# Supplementary material for: Uncovering a Complex Virome Associated with the Cacao Pathogens Ceratocystis cacaofunesta and Ceratocystis fimbriata
Source: MDPI journal article supplement (doi:10.3390/pathogens12020287), 2023-02-09
Supplement: s1 [file s1]

# Uncovering a Complex Virome Associated with the Cacao Pathogens *Ceratocystis cacaofunesta* and *Ceratocystis fimbriata*

Roy Bogardid Ardón Espinal <sup>1,†</sup>, Sabrina Ferreira de Santana <sup>1,2,†</sup>, Vinícius Castro Santos <sup>3</sup>,  
Gabriela Nicolle Ramos Lizardo <sup>1</sup>, Raner José Santana Silva <sup>1</sup>, Ronan Xavier Corrêa <sup>1</sup>, Leandro Lopes Loguercio <sup>1</sup>, Aristóteles Góes-Neto <sup>3</sup>, Carlos  
Priminho Pirovani <sup>1</sup>, Paula Luize Camargos Fonseca <sup>1</sup>  
and Eric Roberto Guimarães Rocha Aguiar <sup>1,\*</sup>

<sup>1</sup> Center for Biotechnology and Genetics, Universidade Estadual de Santa Cruz, Ilhéus 45662-900, BA, Brazil

<sup>2</sup> Department of Microbiology, Universidade Federal da Bahia, Salvador 40170-115, BA, Brazil

<sup>3</sup> Department of Biochemistry and Immunology, Universidade Federal de Minas Gerais,  
Belo Horizonte 31270-901, MG, Brazil

\* Correspondence: ericgdp@gmail.com; Tel.: +55-31-99202-0015

† These authors contributed equally to this work.

**MK231018.1 - *Mycosphaerella hypovirus A***

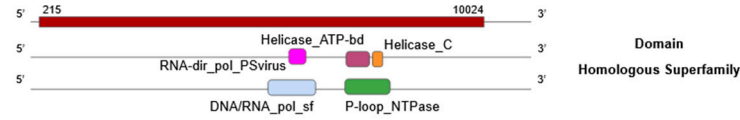

**MK584852.1 - *Alternaria tenuissima negative-stranded RNA virus 1***

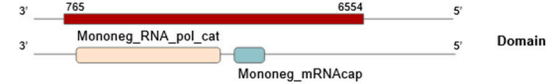

**NC\_006440.1 - *A. cherry disease-associated mycovirus\****

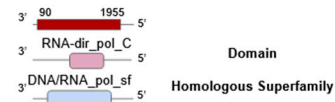

**NC\_006440.1 - *A. cherry disease associated partitivirus CP***

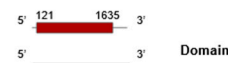

**MN619799.1 - *Botrytis cinerea binarnavirus 5***

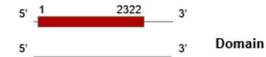

**NC\_004046.1 - *Cryphonectria parasitica mitovirus 1***

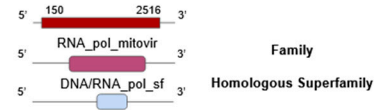

**NC\_012585.1 - *Thielaviopsis basicola mitovirus***

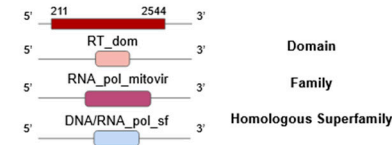

**ON955056.1 - *Tvarminne alphaendornavirus***

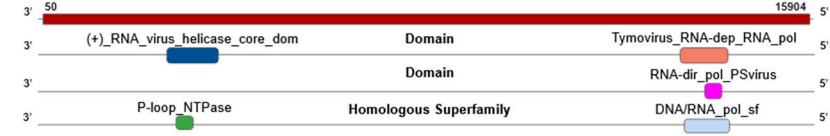

**MW788771.1 - *Alphaendornavirus sp.***

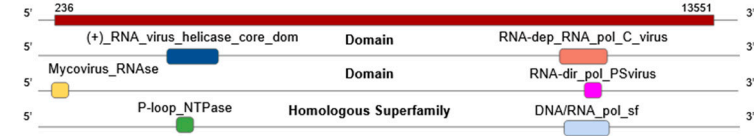

**MK279478.1 - *Morchella importuna endornavirus 2***

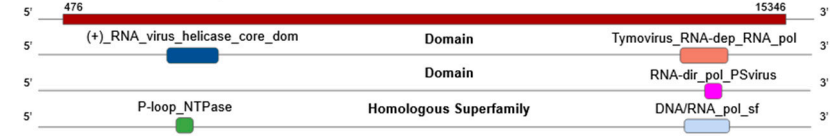

**MZ218601.1 - *Totiviridae sp.***

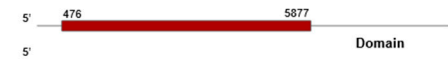

**NC\_040653.1 - *Colletotrichum eremochloae totivirus 1***

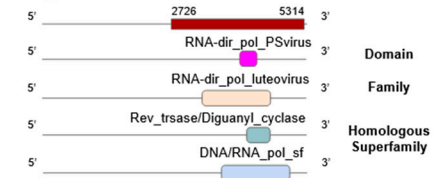

\* *Amasya cherry disease-associated mycovirus* is a below-species classification of *Cherry chlorotic rusty spot associated partitivirus*

**Figure S1. Conserved structures of the hit organisms for e-value of the studied sequences based on BlastX similarity analysis.** The ORFfinder program was used to identify the largest ORF and InterProScan program was used to identify conserved structures.

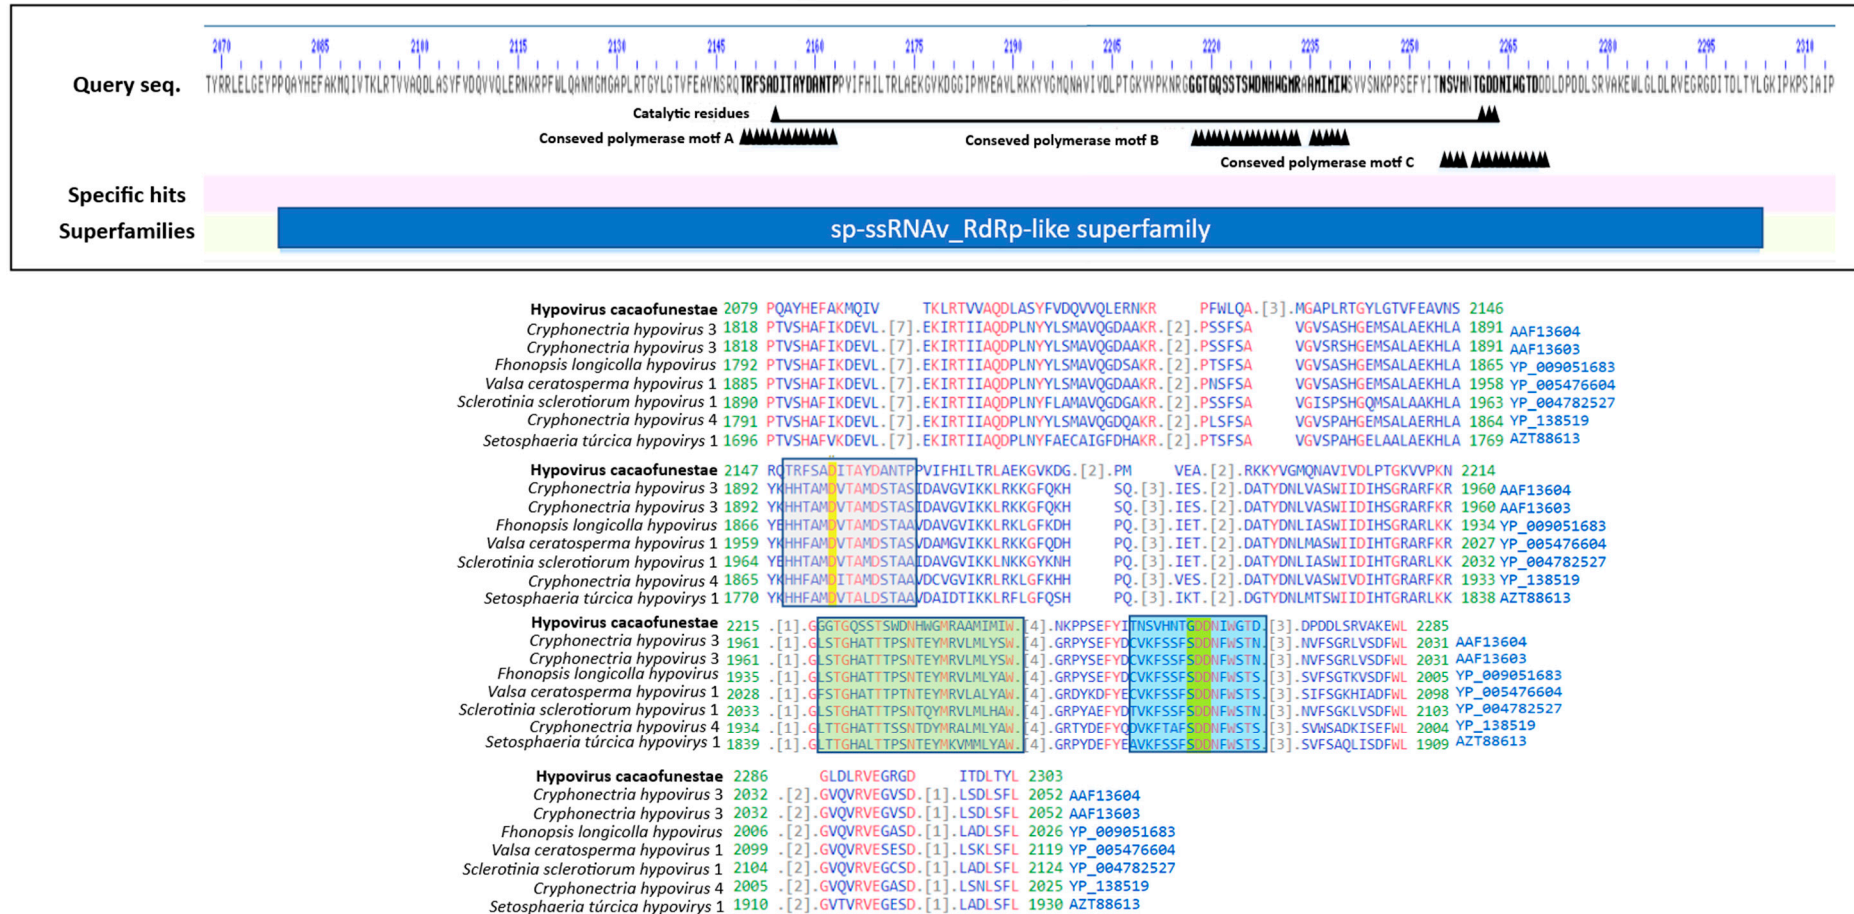

**Figure S2. Conserved motifs and catalytic site in the *Hypovirus cacaofunestae* viral contig.** A. Superfamily cl40470 similar to ps-ssRNAV\_RdRp located in the interval 2079-2303, conserved polymerase motif A, located at position 2149-2163, conserved polymerase motif B, located at position 2217-2233 and 2235-2240, conserved polymerase motif C, located at position 2255-2258 and 2259-2269 B. Species of the family *Hypoviridae* with similarity of motifs conserved with HVC, Catalytic site (Yellow), Motif A (Light Grey), Motif B (Light Green), Motif C (Lemon Green).

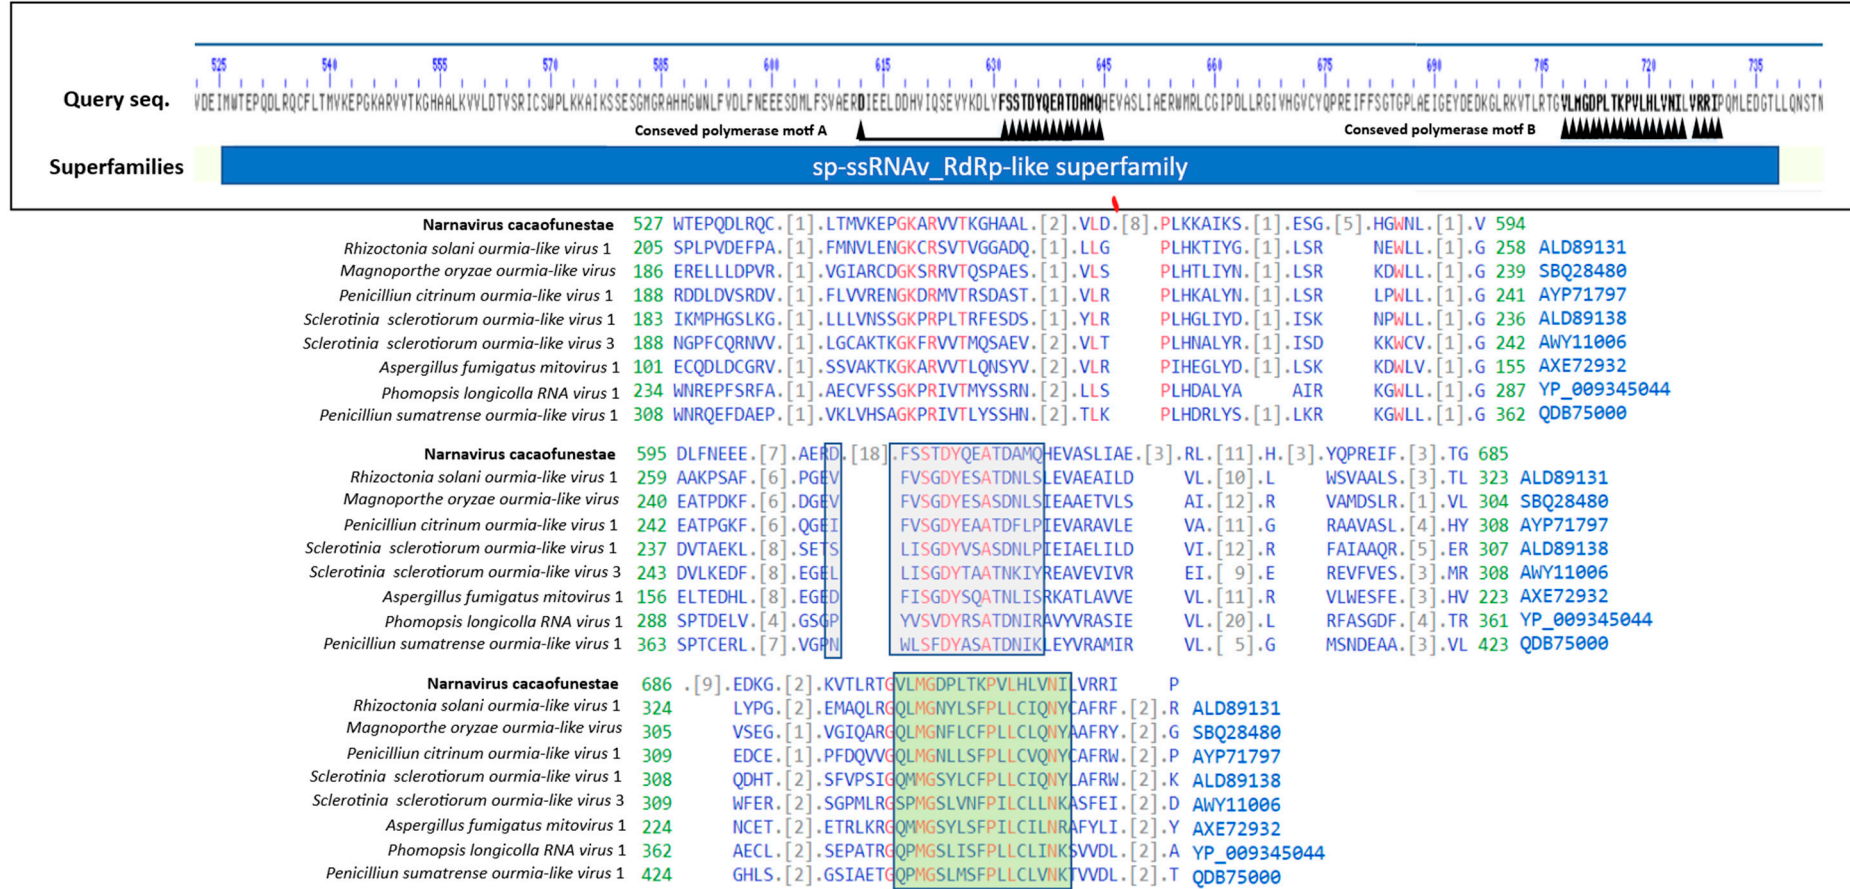

**Figure S3. Conserved motifs and catalytic site in the Narnavirus cacaofunestae viral contig.** A. Superfamily cl40470 similar to ps-ssRNAv\_RdRp located in the interval 527-736, conserved polymerase motif A, located at positions 612 and 631-644, conserved polymerase motif B, located at positions 698-724 and 726-729. B. Species of the family Botourmiaviridae and Mitoviridae with similarity of motifs conserved with NVf, Motif A (light grey), Motif B (light green).



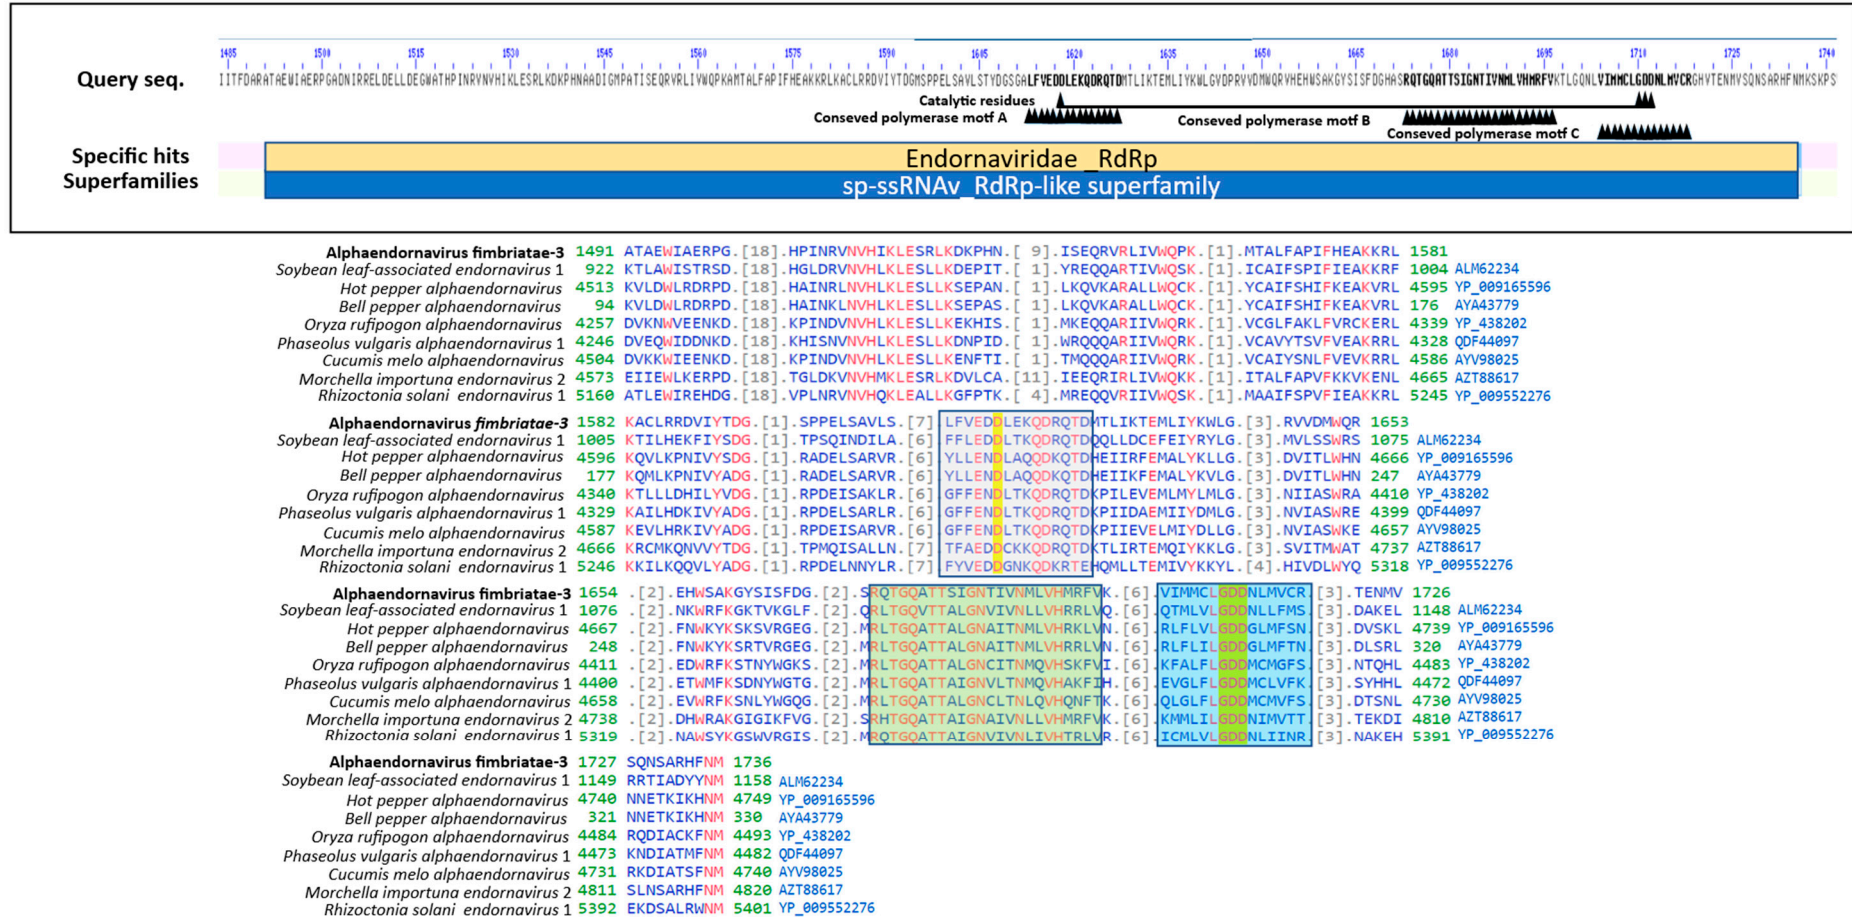

**Figure S4. Conserved motifs and catalytic site in the Alphaendornavirus fimbriatae-3 viral contig.** A. Superfamily cl40470 similar to ps-ssRNAV\_RdRp located in the interval 1491-1736, conserved polymerase motif A, located at position 1613-1627, conserved polymerase motif B, located at position 1673-1696, conserved polymerase motif C, located at position 1704-1718 B. Species of the family *Endornaviridae* with similarity of motifs conserved with AEVf-3, Catalytic site (Yellow), Motif A (Light Grey), Motif B (Light Green), Motif C (Blue).

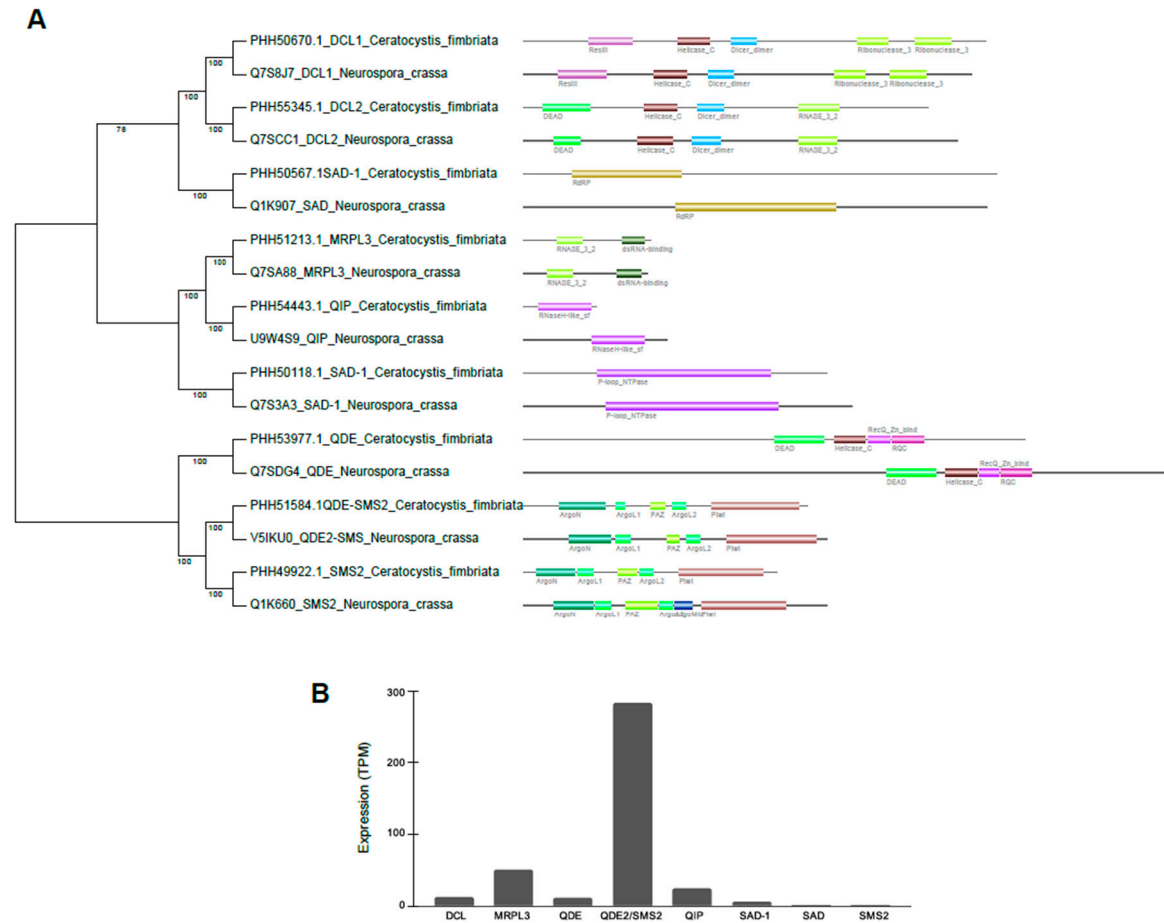

**Figure S5. Characterization of RNAi-related genes in *Ceratocystis fimbriata*.** (A) Dendrogram based on sequence similarity. (B) Evaluation of RNAi-related genes transcriptional activity. Quantification was normalized by Transcripts Per Million (TPM).
