# Supplementary material for: Uncovering a Complex Virome Associated with the Cacao Pathogens Ceratocystis cacaofunesta and Ceratocystis fimbriata
Source: Pathogens. 2023 Feb 9;12(2):287. doi: 10.3390/pathogens12020287 (PMC9967352; doi:10.3390/pathogens12020287)
Supplement: Supplementary file 1 [file pathogens-12-00287-s001.zip]

Archive with 7 entries (7 files):
- Supplementary data.txt
- supplementary_material.pdf
- tableS1_ libraries_information.xlsx
- tableS2_blastn_blastx.xlsx
- tableS3_ phylogenetic_trees-updated.xlsx
- tableS4_kaiju.xlsx
- tableS5_RNAi_related_genes.xlsx
