# Supplementary material for: Uncovering a Complex Virome Associated with the Cacao Pathogens Ceratocystis cacaofunesta and Ceratocystis fimbriata
Source: Pathogens. 2023 Feb 9;12(2):287. doi: 10.3390/pathogens12020287 (PMC9967352; doi:10.3390/pathogens12020287)
Supplement: Supplementary file 1 [file pathogens-12-00287-s001.zip › Supplementary data.txt]

>HVc
ATCCTCCTTATCGCATGGTGGCGAGGAGAATCCGGCCAGACCCACATTTGTGAGTCATGGGAAGCGACACTAAGGTGTCTGTCTAGCATAATTGTGAAGAGGCGAGACCGGCGTCTGTAATAGCGGGGCGATCCCCCGCGACTGGCACGCGACGACGCGAGCAGCGATCGCGGAGCTAAAACCTCTAGCGGTGCGTCTAGGTAAGGCAAGCCTGAGTCAGCGCCTTACTGAAATTAGTCGACTTACTAACAGTAAAATCACCCCCCGTCGTTCTCTTGTAGTTGGTGAGCCAACAAGAGGATCGACGTTAAAATCTTTAACGCTCACCGGCATCATTCAGGGTCTGATGCAAAAACTGACCCTGTGGCTAGTCTGGTTGTGCTGGCCACGCGGTTTGGGCTTGATATTAGCCAAAACCGGGACCGATTCAACCGCTTTGCGGCGTAGATGGGCAACAGCTCTCCCTTGGGAGGGCTGCGTGGGCATCGACGGCGTGTGTTACTTGAAGGCTATTGATTTAGGAAGCTGGGATAGAGCTTATCTTTCCTTGGGAATCTTCCCTCGATACCAACAAGCAAAACAATGGATGGCGCGTGGAGCCCGGTTCCGTAGAACCGGGAAGGCAATGTTGCATTGCTGTTCCGATGGGTTAGCCACCCCATACCGCAATGAGCGGGTGGGCGGCAAACGCCAACGCCATCGACGACTGCTGAACGAAATCAGAGCAGGTTTGCCAGCCTGCTCTGCTTTGGGCGACGGTCGTTACACTACGGATTATGAGGTGCTACAGCCGGTGGGAAGCTGGAAAATGGAGAACGGTTTAATGATTCACGAAGGTGAATTCCTAAACCCTATCCACCCTCCTTCTTCTTCCGGGTGGTGTTACCTTTCAATCTTCCAGCCGCGTTATCAAACCGTCGCGGAAGGAAGGTTGGGTCGATGGCCGCGGACTAGAAGCTTGCAAGATTTCTCTCGCGAAAACCCGAATTTCCTAATCGATGGGAAGTTCGAGTTGCAACTCAGAGTTGTTTCGGGGTTCATTCGTGCTCATATTGAGGGTACGCAATCAACCTCCAATCAAGCTTTGAGCGCGATGGAGATCTTAGATCTGGTTCCACGGCATAAGACCTGCGTCGGAGGTCGATCGCCCAAAGAGAGTTACGCTATTGCGACCAAAGGTTATGGTTATAAATCTTTGGACCAATATGACGCCACTCTCCTGGACGAACTGGTAAACGGCAAGATAACTTGCACCCCCCTTGGCGGGGGACGTTACACCAGCGACCACGACGTGCTGCAATCGTGGGGCAAATGGGAAGAAATCGATGGAAAAATGTACCACACCGGTACTTACCACCATTCTTTGCATAGCCCTACGGTTGACGGTTTTTGCTACTTGTTGTGTTTCTACCCAAGATATCGGGCAGTTGCTCAGGGAAGGTTAGGAAAGTATCCTGACGCTTCCCTCGTGCGACGGCTCGCTATGACGAACACCCATTGGCTGGATGTTCGCCCAATGCTTAGGGTAGAATACGATGTGAACCCATCTCGCGAATGGGCTCCAACGATTACACATGTGGTGCTAGACACCAAATCTGTATTCAATGGAGCTTCCATCGCGCGATGGGGTCTTAAAGGTCACGTAGGCGGCATAACGAGAGGACTAGCTGGGTCGTACATCGACCCGCCAGCTCTCCAACCTGGCGCGGTGCACGTTGAGGACGGTTTCTATTTCAGGGCGGAAGGTACCATTGGTCGACCCGATCAAGGTAAACTCCGTTCCGCTGAATACAAAACGTACCACAATGTGCATCCTGCCGTGGTTGACTCCGCGAAGGGGAAGCAAACGGACTTCGACGAAAACCCCCGTTTTTCGAGGATTTTCGACGTTGCCGATGCTGCCTTCGCGGAAGTAAGCGCTACGTGGCGAACAGGCGACAAGGTGGTTGTCACCGGATGGCCTTGGGGTTCGAACGCTGTCACTTCCAAACACCCTGGCGAAACAGTTCGTCATGGTGTTCGGGGGCTAGTTTTCTGCTCCGAAGCTTCATCCGGTTACATCCACCCCGCCTGGGATGTGATTGAGCTACCATTACAACCAACAGATGGAAGGTTGCTCGCTACCATTCGTTTGCTACCACTTGTCGCAGGAAGGTCTGATGTGGACATATGCATTGTAAATGCTAGAGTCCCTGAACAGCACCTAACTTGCTTCGAGTGCTATGCATTCGCTGGTACGGCAACCTTAACCTCCAATAGTGGTTGGGCGCCTGTGTGGTTTGGTGGATTCGCGGCACAAGGGGCAGTGTGGGGTTTTGATAAAGCCATATGCCGCTCTCACTTCGCGAAATTCGCCGACGTGTATGGTGCAGACGAGATCTTTGCTTATGTCCGAAACCCTATCTGTCTCCCTAACCGGGCGTTAGACGGGGTTTTTGACTGCATGACGCTGTCTGACACCATCCACGATGTGGCGTACTTCCCTCCAGAGTCTTCTTTAGGGGACAAGATATGGCGGTGTCACACCGCCAAAACTTGGACCGTAAGAGACCTGGTGGAAGGATCGAGAGGGAAATGGCGACCGTCGGTTGACATTCCCTCGCGCACGGTGAATCATTTTAGAAACTTGTTCGATCTACAAGGTCAAGCTGAGTATGAATGCGCTCGCGCAAACATCCCCATCTTGGCCTCAGATCGGGCACTATCTAGGAGAGGTCACCGTTACGCCCACACACAGGTTAGCTCGCCGTCGAAGGACTCAACCGGGTACAACTTCATTGGAGGCATCTGGCGACCTTATGACGTCGCCTTTGGCGCACGTTCTAGGTTGCGAACAGATGTCACCCAAGGATTGGACCCTCGGTTGTGGCCTTTGATGACCCACCCCGATGACCGTATAAAGGTCAACGAGGAGGTTTTGGCAGCTCTCACGAAAGGTCAGAAGTTGGTGGAGGTGTACGCCACCAACTTAGAGGCCGGAATTTGTGTCGCCGTCGCAGCCGTAGCCACCCAGCGTGCAATGACGAAATTCCGTTCCGCCAGGAGGGAATTTGATCATTGGATCTGGTTGACTGAAAACAACGAGCTGACGTGCGTCGACGAAAAAGACGTTGTCGTGCACCTCCCGCGGTGGTACGGGGTCGGGTTCCATTTTCAATTGGCCCGTTTGATCCCAGCTACCGCGGGCAGACATGACGTCTTTTTCTCTTGCGTAAACGACTTAGAAACCGACTGGATGCCTCGCAGCGAAAGGTTGGCGGCGGGTCGGCAGTGCATGCCGTATTACGATATGGTATTCCCTGCCATGGGTTTGAACTGCCCGTGCCCGTTTCAAGACGTTTACGGTCGAATGGACGCTCTAAGCGCCCATCCGGCCAAACTCGAAAGTTGGCGACGCGTCGTTGCATCCCTTGGATTCTTATATGGGATTGACGAAGTGTGGTCTGCGGCTTGGGGTTTTCCTACAGTTGCAGTCAGGTGGGAGCTGGGAGCCGGGGCAACCCCGAACTTCCGCAACCCACGTGATAACTTAGTTCTTAGGCAAACCGATGAAGGGTTGAAAGGGTACGTGGCCAGCCGAGGAAATTTCTTCGACTTGTTCCACGGCTCCCCGTCAACTTTCGAGGTTACGCCGATAGGCAAGGATAGGGACGTAGCTGGAATCGTACGAAACAAAATTCCCAAAACGATTGGTGGGGCTGCATGGGATATGCAGGTTCGTCATGACGTTGCGGAAAAATGTAGAAACGGTTACCGTCACATCGCAATCTTTGTCTGGGGTACTCGTGGGGATCGCGTCCCACTTCAGTACGCTGCTTCAGAGCTTCGAAAAGGTGGTATTGAGGCGACAATCGTCGAACTCAACACCACCAGCGAAGGTAAGGCAGGTTTGGAAGAATGCGAGAAAGGGAACGGGCTCAGTTTGACCCCCCACCTTCTACATTCTTCTCAGATTGTTGCCCGAACAGCAACCCCTAATTTGGCGCCAGTCTATTTGTGGTCTGGGGGTAAGTCATTATCATATGATTTAGCTCCAAACCCCAAATATGGTGGTTCCTCACGCGGTGGACTCCCCTGGTATGTTGATTGGTTGGTTCCATTAGTGACGGCGCATTGGACGCGTCATATACGAATTGGAGCCTACCGAGGCACCCAGTGGTTTCCTCGTTCCGCCGACGGCATCTCTCCTCTTCCCCGTAAAGTAGATAAAACGAAGAGAGCCGTTAGGCGGGGCAGGGTTGGAGGTTCATCCTCCATCCCCGTCCCTAAGGAATACCAAGATTGGGAAGAAATCCCTTCAGGGGATCATCTTGAGCTATTCCGAAACTACACAGAGGTTGCGTGTGCGGGTGGAGCTGGAGTTGTCCAGACTATTGCAATGGCCGGAGCCAGAGCAGTGGCATGGGATAACTCCATCGACCGCCAGTATTCCGATCCTACCGACGCAGGGCGGGGAGTCGATGGTAACGAAGCCGGTTGGAAGTGGCGGATCCTGATCCCCTATTTCTACCCGTCTTACTCCAAGATTCTACACCCTAGGGTTTGGTGGGCGTATATGTGGTTCAAGGTTTCGACGGTCGAAATATTGCGCACATTGTGGCAGCTGCTATTTATAGCGTATAGCTTCCGCAAATGGCACATTATGCCTACCATCGAATCCACCATTTCTCGCAACCTTTTAGGCACTAGTCACCCGCTCTTCGCGCTGCTCCTCGCCCGGTTGATCCACTGTTTGTGGGTTGCCTGGGGTGAGGCCACCGGCAAAGGAGTGAATGAACGTATCTGGCTACTAAGCAAACAATTGTTTGCGGGTGTAACTAGTTCGTGCATGTCATTCCTTGCTTTGTGTGGTGCGTCGACTCGGTTGTCTATCGTGCTCTCCACTGTTTATGCGTCATTGCCATCCCCAGCCGCAACCATCGCGAATATTAGATTCGGGAGGTTGTCGGTTGGAGAGTCGAGGTCGGTATGGTGCGGACTGACGGTCGTCTGGTACAAATCAGTTCCAGTCGGCCTTCACGCCACCCTATACAGCCCCGAAACAGGCGTATTATATCAGGGAGTCCACAAGCGGGGAGCTGGGTTAGGAACCAGTTTCGTCGCGCACACAAGAAAGTGTGCGTTCGTCGAGTCCTCGTTGTGGTTACAAACCTCACTTCTAGAAAAAGATCTGGCAATCGAAAAAGAAGTGAGTGGGATGTACTCGGCGTGGTTCAACTGTCAAATGGTCGTAGTTACAAAATTGTACACGTCCGGTGCTGCTAAAACCACTCCGCTCATCTCTTTACTCATCATCGGTTTAGCTACTGGTCATGCCTTCCTAGCATTGACCTTGGCTTCACTTGTTGTTGCCGCGATCGGATCCATGGGGGCTCTAGCGACGCTTATGCTCACACCACTTTTCCCATCACACCCAGAATTGGGTGAATGGTGTAAAGTGATTGTGAAAGCAGCGTCGAAAGCAGTCACACCATGGTTCGGTGGCGTCACAGACGATGATGATGAGGAAGCCAAAGAAGACTTAAGTGATATTACAAAAATCACTGAGGCGGTCGTTATCCTCACGACCGAAGCAATCCGCAGCGGTGTTGACCAAGACACCGCTTTCGAGGCTGCTTCTTCTTCCATAATCACCTCTCTAGCTGATTATGGGGCTACCGACCAAACAGAACCAGTGACAAAAGAAGACACCATATCTTCGGTAGTCGAGCGGTTGAAAACCGCTGGAGTTCCGCAAGAAATAGTGTCGTTCGTTGTCCGAGGTTCGTTTACCATGTTTGAGCAGGCATGGGAGGTCGGGGGGTTCTTCACGAACTTCTTCGCTTTTATCTGCTCGCAAATCGAGTCACAGTGGGGGGTCGTTTTCCTACCAGACCTCGCAAGGGGTCTGGAGCATTTCGTACGCGGTCAAAGTCAGTCGATTAGACAAAAGAACGCGTGGGCTCCATTATTTGGGAAACACCTGGATCGCCTCCGACCCGTTGATTGGTTATCCGCTGGCATCGAAGAATGGAAGGAGCAAGACTACGATGATCCCCTTCACAGGATCATCCAAAACTTGAACGAGTTCTGCCCCGCAGGGCAGGACCCGTTGGATCTTCAACAAACTTTCATTCGAAAGTCCAGGCTGCCTTTTGCGCCCAGGGCTTCCGAGCAAGAGTTTGCTAAGGATTCTCTCCTCCATTCGGTGTCGACGGTGATCGATCCCATGCTCGAAACCAGAGCCAAGAAATATTTGGCTCTAGGTGGAAAGCAAGGAATCGACGGGATGTGGTTAGCGACGGACGAAGAACGGGATCGCGTAAATGCGCGATATTTGCCGAGTCCTCGCCCGACGCTCCCACAGGAGGAACAGTTGGCTGACGCCGTAGCTGAATGTCTGTACGACAACCACCCCGACGCTTTTAGCAGGCCCGGAGTTGTGTCACCAGAGACAGTCAGGAACCAATTAGTTAAGAAGTACAGCCCGGGGCTGCCCCTCTTAGCTAGGTTCAAACGTCGTAGCGATCTGATTAAAACAGGGTGGATGGATGCTGTGATCCAAGCCACCTACCGAAGGTTAGAATTGGGCGAGTACCCACCCCAAGCTTACCACGAATTTGCGAAAATGCAAATCGTGACAAAGCTTAGGACGGTAGTGGCCCAAGATCTAGCTAGTTATTTCGTAGATCAAGTTGTCCAGTTGGAGCGAAACAAACGTCCATTTTGGCTACAGGCGAACATGGGAATGGGAGCCCCACTTCGAACCGGTTACTTAGGTACCGTGTTTGAGGCTGTGAACTCCCGTCAAACCAGATTCTCTGCAGACATAACGGCGTACGATGCTAACACTCCTCCAGTCATCTTTCACATCTTAACCCGGTTAGCCGAGAAAGGCGTGAAAGACGGCGGAATCCCGATGGTCGAAGCAGTATTGAGGAAGAAGTACGTAGGTATGCAAAACGCAGTGATTGTTGACCTTCCAACAGGTAAGGTCGTCCCGAAGAATCGTGGTGGCGGCACAGGCCAATCATCCACGTCTTGGGACAATCACTGGGGTATGCGAGCCGCAATGATAATGATTTGGTCGGTGGTTTCAAACAAACCTCCGTCCGAATTTTACATTACGAACTCTGTCCACAACACTGGTGACGATAACATTTGGGGGACTGACGACGACTTAGATCCAGACGACCTCTCTCGGGTCGCAAAAGAATGGCTAGGACTTGACCTAAGAGTTGAAGGGCGCGGTGACATCACCGACCTCACATACTTAGGTAAAATACCAAAACCTTCTATTGCGATCCCCGAGAGGGGCCGCCTGCCCCTCCCGACTTTTGTCGCGGCACCGCTGCGCGAGCAATTCCTCCTTCGACGCTCCGCCGTAAACTCCCGAGTGGCAGGTCTGCCTCCGGTAAAGTATTACGAAAAGCTCGTCGAAAGAAGTATTGGTCATGCCCAGAACTGTGCCTTCGATCAAGAGATGTATTCGCTTGTCGCCCACGAATACATGGAGGAAGCTTCTTCCTACCTCGGAAAGAACGTGCCAGTAATCTGGCGCGTTAAGTCTGGCGGCGAAAATTTAGTTGAAGGTGTGTCTTTGCGGATACCTCATGGTACCCACTTACCTCCGAAGGTAGTTGCCCGGTTGGAAAGACTTAGGAAAGACCTAAGATTACCAACTTATACCTCGGTGATAAACAAAGACGCGCAGGCCCCCCCCAAAATAAAAGGCGAATCCAAATTCGCGTACGCCACTGTTCCTATCGGGTGGGAACGGCTGATGCGTGCGAGCATTGCAACGGCACGTGTGAAGTGGAATTCTTGGATTCCTGATTCACTGGTTAAGCTAGCTGGAAAGTCTGATATGGCTCCAGTCGCTCCTTTATTTTGGGTTCTGGGGTACCCTGTCGAAACCTTCGTGTGGAGGACGATGGTGTCCGAAGATGGAGAAATACCATCTTTGGATACCTTCGCCTTTCGGTGTAGAAAATCACCTTTTTCCGCTGCAACCGACCCAGTAAACTTTAGCTGGTGGATAGAGAAACATGAGAACCAAGTCCACGTTCTAAATCAAGATTATAGGTCGATGCGCGGAAGAATGATGGTCGCCTTCTTGTGGTACTATGTGATAGATTTGCTTTACGGCATGGCTACACAACTACCACTTGTAGGTTTGGCAGTTGAAATGAGCAAAGTATGGAGGTTCGACATCCCACGTCTATTCTCCGTGCTCAGCTCTTTCTACTGGCTCGACACAGCCGACTCATCTGCTATCATTTCGGCAATGATGCCTTCTGACCCTTTCGGGTTCGAGAAGAAATGCGCTCTCTGGATGGCGGCTTTGACGCCATACCATTTGTGCATTATCATTGGCGGAGTGTGGCCGATTAGTTGGGTTTCTACGCTGAGTAACTTAGTCGGAAAAGTTACCACAATCACCCGCATCTCCCCGTTCAAGCGTGGGGATGCGGTTCCGACAAACAGATGGCAAGGCTCGATCGTCAACGAAGTGATGACAAAATTATCACTTGCGGGCAATCGTGGCCTCGTCATCTCTGCTCCTACTGCTACCGGAAAAAGCACACAGTTTCCCGCCGCGCTCATTCAACTCACGAGTCGAAGGGTGTGGTTAGTCGTTCCACGGATTGTCTTACGAACATCGTACAACAATCCATGGATCGACGGGAGACTGGTTTTGAAGGCCAGCAGAGGAGTAAAACTGGGATCGGAACCCCTGGTCGTGTGCACTTACGGGCATTTAAACGCCCGTGTGACGCACGGATCCGAACTCAGTCCGGAAGACATAGTACTCTTCGACGAGTTCCACGAGGAAGAACCAGAAATGGGAGCTTCCGCGTGGTACTTAAGGGATCATCCTCTGAAAGGCTATTTGAGTGCGACCCCGTCGACGCTTTACGCGCCGAACGCCCTCAAACTTAGCATTTCATTGGAGCGACCCTACGAAGAGCCTGTGCCTATCCGGCTAGCCCTACCAATAGTCCAACTCTTTCAAAAAGCTGCTCAAGATCACCCCCAAGAGATCAAGAGATCTCTCGTGATCGTGAGTAGCTTGAAAGAGTGCGATATGGTTGCTGCATCCATAACCAGTATGGGGTACGCTTGTTCAACCTTGAATAGATTGAACAGACGAGTTCCCCCATATGGTGTTATTGTGGCAACCCAGATCGTTGACTCTGGTATAGATATTGACCCCCCAGTCAATATCGTGGTTGACGCCGGGGAACGCATAGTAAGCAGCAAAGGTTTTACATTTAGACAACCTTCTGATGCTTCTACGGACGTTCAACGACGTGGCCGGGCTGGGCGTAGAGGGAAAGGCTGGTCATATACCACCCTCCACGCCGGGACTGGGAGTCGCCCAATAGCGTATCCTTCTTACACTCGAGTAGTAGGGGATGAGAACCTTCGAAAGTTCTTATTCTCAACCTTGGGCATAGAAGATCAGCTGGACGATTTGCCAAATGCTGTCCGGTTCGACAAGCGGGTATTATTCCCTCCTGCCGAATCCGGATTCCAACTCGTTGGACTGGCCGCCTGGTGGTTATTGATCAATTCTGAAGGAACAGCAACAGAAGCTGGTCGACAGTATGATCAAATATCCTTTTCCGGGTGGTCGGAGCAACACGATGGCGTCCGCAACCTATTGCTAAACTGGTTTGGAACCTGTCGGATCCCCAGCAGATCACTGATCTGCGATGTGGTTTCCGAACCGGCTTTCACTGTAAGCATAGGTGGAGTGCGACGCGTCGTGTCACGTCTAACCATCCAAGACGGTAAAGTGGATGGCGTTTGAAAGGCAAACGCACACGAGGGCAGGTGCCAATCTTCCGACCAGGTTTGATTGACAAGATGACATAAACGCAACCCCCCAAGTGTGGGCCCTTCCGAAAGGGTTTAAAAAAAAAAAAAAAAACTTT
>SVc
ATTCCTATCAACTATAATGTATACTTAGATTCGCTGAGTCGAGGGAAAACTGAATACTCTTATTCGAATTTCTATCGCTTGGCTCATCCGTTTTTTCGCGACTTGACAATGACCTCGAAGAAACCAGAGATCTTGAGTGCTCAGTCTTATCCCGAGTATTTCTCTCGTACTCTCGCCTTACGTTCAGACGTCGTAGCTGCGCTGCAAGAGAGCCGGGAACTTTACAATACAGAACTTGTAGCGATGCGAGATTGGGCCGATGTTCCCGAACTAAGGAAGATGATTGATGGGGAGTTATCTCTTCAGCATAGTATCTCCGAAAAAACGTACATATTCTTCGAGAACTTTAGGTACTGGGATCTAGTGGTAGAGAGGTATAGGTCTTGCAAACGTCAGAAGGCGTTCGGAAAACTTCCTTACAGTGTGCATTCCATAGAGTATCGTTTTTATGACGGGTTTGTGATGGAGACATGGAGCGATGGAGCGCATATCAAGGACTCAAACGGGGTAACGTTGAAGAGATCTCCTCCGACTCGAAGGCTGATGACTTATGAGCAGATTCAAATGCTTCAAGATACGTGTCTAGCGCGATTCAATGCAAGACTCGCACTTGACTTGCATATGCATAATGGGAATGAAGACCTCTCGTCCTTGTTCGATAGGATATTGTGCTGGCAAGAGAAGGTACTTCTGCGCTATGGGAATTCGGGGTACGAACTGGTAAAGGGCCCCGAGTCGGTCGCTAAAGCGCATCTGACGTCCATGACAAACGGGGACGTTCTACCCGAATCGTCGTACGACAGGACGCTCGAGAAGATGCGAAACAAAGAGCGCAAGTTAGGGAATAACTCCAATGTATGGCTGACTGACGAATTGTCGGATATCGTACGGGACACGGGCACCCTTTGGAATTGCGCAGAAATATTCGGCTGCACGAAACTTTCGGGTCATCCTACTGTGTATGCGGACGTATCAGCAGCCTCCGTCAGAGAAGAAGCCTGTACTCCTGCTCAATACGATATACCCGCTATAATCGACACTCATTGTCATTTCAAGAGGATAATACTCCTCCGTTACATCTCGCAGCACAAGGCGTGGCCTCCATTCTCGGAGTACTATCTACCTAGAGAGAGCACCCAATTATACCAGCTCTGGAAGAAAGAAGTACTGACATTATCCGAATCTTCTTTTCCTCTCCGCGATTTGATAAATGTTGAGTTCGGACAGTTCATGGAATTTGATTATTCTCCGGACTATCTCGATTTGATAGATGATAAAGCGATTTGTCCAGGGGCATCCAAAGCAGCCGGATTCTGGTTTAAGCAGCCCGAGGGATCATACCGCCGTCTGTTAGAAGCACTCGTGAAAACAAAAGACATCGACACACGCGCGATAGTAGAAAGAATGAGAAAAGGGGAGTTCCATCTCGAAGAGAGAATTGTAGAGTTGACACAAAAGGAGAGAGAGTTTAAGACTGCGGCTCGATGTTTCTGCAAGTTAACTTTGGAGGTCAGGCTGTTCTTTGTGATCACTGAGGCAAATCTAAAACGGTTTGCCGGGGGCGACGCTGGGGATAACGGATATCTTCCTCAACAAACGATGACTATGTCGAGTCAGAAGCTGAGAAAAAGACTTTACGACATGACCGCCAACAGTACTCGAGAAAATAGTTGTGTGGTGGAGATCGATTTTACCCGATGGAATCTGAGATGGAGGGGAGCATCAGTCAACCACATAGCGAGATCCCTCGAAAAAATCTATGGCCTCACAGGAGTATTCTCGCAGGCTCACAAGTTCTTCTCGGAAGCAACAGTTGTCATGACTGACAAACACTCTCTTCCCCCGGGAGTTCGTCTAGGCGTTCCCGCTCATAAGTGGCCGGAGTCGGACCTCGTTTGGAGAGGGCACGCAGGAGGGTTCGAAGGAATCCAACAGACACTGTGGACCATTGCAACGATCGCGATGATGTACTATGCTACTGCCGACGAGGAGTGCTCCTTCCAAATGGCAGGACAAGGGGACAACCAAGTGTTTTTCCTGACATTCAATACGAAAACCAAGCCACTCGAGTCGCAACTAGCCTCGTTCTTATCCAACATGGAAAACTTGTGCGGTCGTTTGAATCATGACGTCAAGCCTGACGAGTGCGTTGATTCCAGATCCATTTTGACTTACGGGAAAGAAATATATGCGAATGGTGTCCATATTCTCTATAGCCTGAAGTTTTCGTCTCGGTCCTTTGCGAGACTCGATCATAGTATGCCTTCCTTGTCGAAAGAAATATCCGGAGTAGTAGCATCATCCGTCGCAATTGCGGGAACTCTCAAGTTCACCTACAGAGCTATATTGTGGAAGTTCTTACAAGTGATTCTCCTTCTGAGAAGAAGACGACAATCACCCGTGTATCTCTCAGAGAAGGCAGGAATAGATCGCCTCCTTAAGACTTCCGTCTCCCGGCAAGCACTTCTAATTCCAGGTTCGATGGGAGGGTTTCCAATGATGCCTTGGACCCGTTATTTTAGCAAAGGGGAAACCGATGATCTTTCTTTCGACGCGGCGGCAACATATTATCTATCGAAGCATGTACCTCTGGTCAAGTCGTATTCATATCTGTTGAGAATAGGCGAGTTCTCGAGAAGAGATATTGACCCGACTAATATTGTGAACGATCCTCATTCCATACCCATAGACAGGCCGAAAGATGCAGTCCATTTCATCTCCGATGCAATCGGCAAGACTCTACCTAATATTGTATCTAACCGTGACTTAAAGCCGTTAGTCGCACCTGGACTTCGACAAAACGGGGAAGAATATAAGTCTATCTTGACGAAGATGACACCATTGTATCCGGAGGTGGCTGCCGATATGTTCGAATTGACCCCTGCTGGACTGTATAACAAGACTGTAAAACGATTCTCCATGACTCGTACCATAGAGAGGATAGCGCCTCAAGAACGGGTCACTGAGAGGATTGTTGATTCGAACTCTCTCTTTTTGAGGGTGTTTCTTGACAGGATTGCTTCGTCATCCAAATGTGTTGGGATGCAGCACCCTCCTCCATACGAAATGTGTCAGCAGCTCCGCGACTTATGGAAGCTGGATCTAAAGAACTCATCGATAGGAATCTACAGCCCCTTCGACTTCAAGCTAAGCTACAATTCATTCAAACAATCAGTTATATCGGCTACGATATCAGGTGAGAATCTCCTAGACTCGGCCGGGAAGTCACAACCCAATTTTGGCACTCGCACCTCGACCAAAGTTACTACGCAAGGGTATCGTATTGCAAATTGTAATAACACAATCAGAGACCTCAAATCCGCAATCCTAATGTTCTCCGAACTCCAGGGGTCGGAGTCAGTGAGACCCATCGTGGATGGAATTGTATCTTCCCGGTCTCCGTGGTCCACTCACCAGTTGTGTCCCATATTTCCGAAAACATATGGCGGAACAGCAGTTCACCGACACGCGGCGGGGAAACACAACTTTGCGATGTTAGGGAGCTGCTCGGTGCCAACTCATATTTCTTTGAGCTCCGACAGAGCAGGAATCCTGTCCGGAGGAGAACTCGACTATCCGGTTGTTTTCCAGACGTTATTCCTTACCTTGTCGAACTTGTTCCAAAATATAGCTGCTTCGAATAATCCTTTACCTTCGAGTCTTGCATTCTTGATTCCGGCAGACCTTCAACCCATTGACACTAGGAAGGTAGAGATTCCTCTCCCGTCGGTCTCAATCAAGTGGCCGAAGCTGACCGGAAATCGATTAGCCTGGACTGACAAGATATACGCATCGGAGATACCAGAGCACCCTCATCCGAGCGTGGTGCAACACATACAGGATCCTCCGAATGATATATCTCTCATTTACTCCTATCTGGAATCTGAAGTGTCGAGAAAGGTCGATGCATTGAAAGTGTGGGATGGCATTGTGTCTCCTACTGATATCTTTGACTTCAAGGAGATCACTAGGGTTTCTCCATACGATGTCGAGAAGGCAATGTGTTGGACCCTACTCACCGACATATTCTATGAAACTCTTCACAGGACGAAGGTATGCCAGTCGCCTGTGAGCTCAACCCTACAGTCTGTACTGGACAGAAGATCCCTCATTTACGCCGGTATGTGGATTCGAATTCGGCTCCATCCGAACCTGCTTACGGAGGATTACAATTCGAAAAGGAATATCGCGTTACAGCCAGGAAAGGAAGGCTACAGAAGAAGCGTCGAATATATGGCTACTCTCTTGAAGAAGAAAGTCGTCGAATACCTAAAGTCTCATTCCTACAGCTCTCTTCCCCATCTAATACTCTTCCAGAACTGGAAGTCGAAAGCTAAGAACCTGGGACGACGAAGAAGGATCCTCCAGTACGCGATATCCGGCTATCAGAAGATCTCCCTGTCAGATATGAAGAATGCCATTCTCCAGCTAGAACCTCCGTCGTCGCTTTCGTCTGCGGACCCGACTGTTCATTTTTCCGCCGCTGATATATCCAGACATCTCCGGCCTTTGGATATCGACGTGTCTCCTATTCGGACCTTCTATATGAACGTGGATCCTAAAGCGGGTCTGAGAATGCTACGCTGTCGGGAATTCATACCTAGGATGTCAACCCAAAACATGATTTCAGTTCTGACAAGAACGAGCGGACGCGTACGGTATACTATCAAGGATAGCTATGGGTACCTTCCCCCCCCCGATTCGGACTCTCTAGTCCCCGGTCGTGATCGACTCAGGGTACTATTGAGAAGAAGGCTCGGGAAATCTTCTCCTTTGTATAGCGACTGGTTGGCATGGAGTACAACTGTACCGAAGGTGGTGAGAGATACTGGCGGGAAGAATGTTCACCTATTCGGAGTAGGACGGGGTGCTACTGCGCGAGTTTTTACGGAGGCCGGTCGGAATTGTGTCGGTTATGATCTCCGGTCTACGTTCCCAATTCTCGCCCAGCGAGACTCCAGCTACCTCCCGCCCGAAATCTCGACATCGCCCCAAGCTAGCTTGTTCTCTTGGTCAGAACATACGTACCGTACCATGGGTAATGTTTTCTCGGGCGAGTTGGACATACTGCACGACGACCGTTCTTTAGCAGTAGTTGACTTAGACCTGCCGTATGGGGAGGTAACTCGGTTCTTGCAGCTCTTACCTTCGTCTTGCACGAAAGTTGTACGAGTGAAAGGTACTGCAGAGGAGATCAAATATTTCGTCAGTCAATGGAACCCTTCTATTGTAACGTGCCTAACTCTATCCTTAGGAAACCCTGTCGATATTATATCGGTCATATCCCCCGGTTCTTTGCCCGTGACCGGAAACCACGATCGAATTGTCTGGACCGATCCTAAGGAGATCTCATATAGCTCTACGTCAGATGAATTGCTGCATCAACTCTGGGACATATACCCTGCGCTGGCGAAAAATATGGAGGTGGACGTTACAGCCTCTCGCGAGGATTACACGGATCACTTGAGAGGCGTAATCTCATCGGCTGACTCAGGCTTGTCCGGACTCGGACGAAAGGTCAAGCAACTATACACTTGCGATGCTGATTCGTTGCACGGGAAGGATTTGAGAAAGAAGGCCCTTATCCTCAACTTATTGACATGATTCTCTATCCGGTACCTTATTATTATTAAATAAAACTTAGGGAACTGC
>APVc-RdRp
CTGAGGTACAGAACTCGCCATACTTTTGTCTCCAACTTTAAAACAAACTTTTCTGAAAACCGAACAGGTATTACTTCTCACACAATGGACCTACTAACCAGTCTTTTTCAACGATTTGGATTCGGCAACAAGCCCGAAGACAACCTGCATTTCGTGGGCACCTACCATCGTCCTCCACATTCTGTTATTGCTAATGAAATCAACATTGCAAAACACAAAACTACCGTGGAATACGCCATGCGTAAGTATCTTTACCCGCACGAAATCGATCACGTCATTAACCAGATGCGTCGCTCAGACGTCACTGAAGATGCGATCCTCGCGGACTTCTTCGACAACAACGTCGAACCTCTCGAACCCGTGTTCGATGAACACTTTGAAAACGGACTCTCTGCCATGCTGGATGCTTTCCGCCCTCCGCAGAAATGCAAACCCGCTCACATCTACGATGTGCAACATCACTACCCATACAAGTGGCAGGTCAACGCTGAAGCCCCCTTCTCGACCGACTCGTACTACTTAACGAACCGGCCAACCTTCCGCGCTGTTTTCGACAGACTCAACTCTGTTTACACACATCTCGCTACCGATTGGCACCGCCGATACGGCAATAAACGAGACAACGATGATTTCATGAATGATCGTGTCCCTGCGAAATTTGGTCCCATGAAAGAAACAGTCTTTTCCTGGACTCACCGATGGCATCATGTCATCAAATCCGGCTTCACCGACACCGCTGGATTGTCCAAAGACTTTTATTTCGAAAATCGATACATCTTCCCAATGCTGCTCCATACCAAGACAGCTATTGTCAAGAAAGACGACCCAAACAAGATGCGAACCATCTGGGGCTGTTCAAAGCCTTGGATCATCGCAGACACCATGCTATGGTGGGAGTACGTCGCGTACGCCAAACTGAACCCCGGAAGCACACCGATGCTCTGGAGTTTCGAAACCTTCACAGGTGGCTGGCTTCGCCTCAACGCTGCTCTCTTCTGCTCGCACATGTCTTGTTCCTACGTCACTCTCGACTGGAAGCGCTTCGACAAGAAAGCCTATTTTTCAATTATCGAACGAATCTTCGACGGAGTCAAATCCTTCCTCGATTTCAACGACGGCTATCTTCCGACTATCGACTACCCTGATACCAGTACACAGTGGACCCAAGAACGTTCCCACCGTTTAAACAACCTGTTTGAATGGACTAAGGAGTGTTTCTACCACTCACCAATTGTCCTCCCTAACGGACACATGTATAAGCGCAGATTCGCTGGAATACCTTCCGGCCTATTTCTCACTCAGCTTATCGACTCCTGGTACAACTACACCATGCTCGCAACGATTCTTTCAGCGATGGGCTTCAACCCACGCTCTTGCATCATCAAAGTACAAGGCGACGACTTTATCGTCCGTCTAAACGTCCTGATCCCCCCCAACGCTCACGATTCTTTTTTGAACAAGGTACAAGAACTCGCTAACTATTACTTCAAATCCGTGGTCTCAACAACCAAATCTGAAGTGCGTAACGAGCTGAACGGCTGCGAAGTCCTGTCCTACAGGCACAAACACGGTATGCCTTACCGAGATGAGTTAACCATGTTAGCTCAACTCTACCATACCAAAGCTCGCAACCCTAGCCCCGAAATCACGATGGCACAATCCATTGGATTCGCCTATGCGTCTTGTGGAAATCACCAACGAATACTCCTAGTACTCGAAGATATCTACAACTACTACAAAGCACAAGGATTCGAACCCAATCGCGCAGGATTAAGCCTAGTTTTCGGTAACTCACCAGATTTAGTGATTCCACACTATAGTCTAGACCGATTCCCCAACCTACGGGATATCAAAATGTTCTTAACAACTTCGACGTATGTCAATGAGGAAACTAATAGAAGAACGTGGCCCCTCGGCCACTTTCTCTATCCTCCTTGCCAACGCCCTTAGTTCTTTGAGCAATTGCAATTACTTAAATTACAAACAAAAAAAAAAAAA
>APVc-Cp
TTTTGGTGAGCCGTTGGGCTCTTTGATGATATTGCACATGTTGAATGTGTTGCGCGTCAATACAAATCAAGATAGTAATGGAAAAAAGAAAACAAATATCTCGTAAAAAGACGAAAAGCAAAAGAAATTTCAAATAAGAATAAGAAAAAAAAACTCGGTGCGCGAGTTATGTTACTCAAACTTAAGAGCAGAAGGGGTGTGGTAGTAACCGGAGATCAGAGTGGGGATGGTGTTTCCAACTCTAAAAACGGCGGTTCTGCGGGTGTGGGGGAGGTCGTGAATGGGACCACAGTGAGTGAACTCAAAGGTGGGTCCAGTGTAGGTGATCTCGTTGCTAGTGTTGAGGGCGTCCCAGTTGGTGTTCAACTGTGTGAGGGTGCCTGCTTGTTCGGTGACAAGTTCGAGGTACTCTTCAGGGTGGGAGTGCCAGGTAGCGATATCGCCGAAGGTTGGGATATCATAGCGCGGAGTGCCAGCTTCACGGTATCGGACGTCACGAGTAGTGATCTCGTGGAGGAGGTGGTGGGCGTTGGAGGGATCGCCAGTGTAGGTGGTGACGATGTAACCGATGCCTGTGCCGATGGTGGAAATAGCGCCGAGGGAGACGGAGTCCTTGAAAAAGTCGCAATAAGGTTGCATGATGCGGGCGACTTGGCTAAACCAATTGTAGGTTTGGCGGTAGTGCGTGAGCACGCCGCGGAAACCAAGGATTTGGTCGAGACTGAGGGGACTAGTGTTCTGACCACTGGTGTAAATTGAATGGCCGTTGTTGTCAAGGGGCAGAGTGCTTCGCCAGATGTTGGCTGAGGCAGCGAGGCCTGACAAAAGGCCGACGGTGGTTTGAACTTCCTGTCGGGCGTTGGGGGAGAGCATGACGATGCGATTGGCAGTGTTGTTGTTGGCTTGTTCGCCGAATACATTGCCGTACAGATTGTCTGTGTGTGTGTTACTCAGAGCGGGGGCAGCAGCATTGTTGGGGGCTAGCATGTTGATAAGACGTGCGAACTGGTCCAAAGTCAGAATGATATTGGGGAGGATCAGGTGCAGGTTGTCGTTCCAGAGGTAGTGATTTTTCTGGCACATACTGGTGGTGCTGGGGATGCCGAAGGTCATGTTACCAAAATTCTCGTTGGGTCCTGCATTAGCAGCTAAAGACTGAAAGAAGACGACAAGTGGACCGGGGATCTTCAAGTGCTCGGCTTTAAAGTGGCTGTCGAGAAACTCGAGGAAAAGCTGTTGATCGTGGGAGATCATGCCAGCGAGAGCCTGGTTCTTGAGGGTCTGATAGTAGACCAAGACGGAGAAATACAGCTGTGACACAAAGGGGTGCCAGTCACTGTTAGCGTCGGTGAAACGCTTGGTGCGTACCATTTGGGTGTCCATGGTTGAGAGGACGAAGAAGAACTGTCCAAAGTCGGGTATCATGTACGAGACTTCGTTGTGCTTAACTCCATAGAATGGGAGGTCGCTGACGCCGGATAGCATCATCGAAAGACCGGGATTCTTAGGTCCTGACGAGGCAGGGGCGGGCTCCTTGGCCTTGAAATTTTTGGCCTTGCGGGTGGGGGCCTCGTACTTGACAGCGGGGGCTTGGTCAGTGGAGGGTGCCGCGGAGGAGGGAGGGCCTTCCTGGGTTGAGGCAGGGGCGGCTGCTGGGGTGGTGGTGGACCCGGTAGTCGCGGGGGCGGACATTTTCTTGTTTTGAAAAATGGGACGTTTTGTTACGTAAGGGGTGTTGGTAGGTAATATGTGTTAGCAGTGCTTGAGAATTTGCTTTAGTGTTTGAGGCGAAAGACGTTATAAGAACAAGTTGCCCAG
>NVc
GACCTTGATCTAACCTAACCTAACTTCTGTGCAAAGGCACCATTTAGGTAGGAATTGATTTAACAAAATTAAACCAACATCCTTGAAGATGAAGCTCGCGAATTACTCGCGGCTAACTTCAAAACTCGCCTGTCAGTCCATAGAGGACTGCAGGCTTTACTACGATCGGAGGGAGAAGAGTAATCCAATCCCTCCTAGTCTAGAGGAGTATGCTCAAGGCACACACACTCTATACCTCCGTCAGGTGCCAAGTGCATCGACGTTGAGGAAGGCATCAGGTAAACTGGTGCCGTCTCACCTCGCCCGAATGGTCGGGGTGAAACTTCCCGAGCTCTGGAATTCTCTAGAGCAGAAGAATCGTACCCCCTCTCCGTATACGGAAGAGGAGGGTAGTGAGGAAGACTCATTCGAAGAATGGGACTCTCCTTTGCCCTTGACAGGGGCAAAATACAAGGATCCATGGAAAATCATGGCCGCGTACGCTTTCACCGAGCAATATAGCTCGGTGAAGCCTGAAATTCTCGTGTGGTCCGGAGGACACAGGAGGATAACGGACCGAGTACCTCAAAGGTTATTCGGCTCGGACCGGAAGGGAAGTACAAACTTCACTTCCGTTGCTGACGTGGATGAGAGATTATACTTCATCCGGGTCCACACTCACTGGGGTCATGCCCTGGGAGAGTGTCGCATTGGCCGGTCTCGAATTGTCGAGGCAGGTTTCGCAAAAAATCTTTGGAGGCGGATTTGCCGCTTCCTGAGAGGCCACTCCGATCCCATCTGGACCGGAGAGGAAAAGGGGCGGTTCTGGAAAGACCAGAAACCGCGCAAACCAGCAGCGCGAGCCATTCGCCTGCTGGAAGTTCTGAAGACAGTCGATGGACTGTTTCTTCAGAGATATCTAAGCTTCCCAGAGGAAGTTTGGACATGGGACAAGTATGACGCTTTCGTCTTACAAGCCCTCTCGTACCTTCTCACGGACGAGTTCCTGGACGGCAGCGTTAATGCTGACGCCATGGATCAGGTCACCTTTTACGAGGAAGTAAAAGGGGCCCGTAAGCAAGCTAAGCTTGCCTTCCATACTAAGCTTGAAGCTCAGTATCGGAACCTGGACTCCCTACCGAGGTGGGTCCAGTCTTTCCTTCGTCCAACCTGGAGGTTGGCACAAAGGATGTCGGGAACTCAATATGTTGAGCTCGCCGGCATAGTGTCGCAAACGAGGGGGTGTGGAACCCCCCCGGCGACCGTGCTTCTTAAGTCGAAGCGGAAGTTCCTGTTGGGAATCCAGCAGGAACCGATAAAGTTGGAGACTGGCCAGCGCCAGCTCCTCCTAAGGGCAATGAACGGGTTAATCTCGTCCATTCCCAGTCACATCTTTAGTGGCCTGACCACTAAAGCGCGTGTTACCGTGACTGGCTCTGCCTGCGCAGAAGCTACACGTCGAGAAGGCGGGACTGCACAGGCAATCCTCGACCTTTTGGAGAAAATCCGGGAGTTTGGGGTCAGCGTTCGCGACCTCCAAACTGGCGAAACTGTTGGGAGTAAGTCCCTGGACAGTTTTGATTCCATCGGCACTGCAATCTTTTTTGCGTGCGTGGACGAGATCATGTGGACCGAACCACAGGATCTCCGACAGTGCTTCTTGACAATGGTCAAGGAGCCTGGAAAAGCCCGTGTCGTTACAAAAGGACACGCGGCCCTGAAGGTCGTGCTTGACACGGTCTCCAGGATATGCTCCTGGCCTTTGAAGAAGGCCATTAAGAGCTCTGAGTCCGGGATGGGGCGAGCCCACCACGGATGGAACCTCTTTGTTGATTTATTCAACGAAGAGGAGTCAGACATGCTCTTCTCCGTAGCGGAGAGAGACATAGAGGAGTTGGATGATCACGTCATCCAATCCGAAGTTTACAAGGATCTGTACTTCTCGAGTACGGATTACCAGGAAGCCACTGATGCCATGCAGCACGAGGTGGCTAGCCTCATCGCCGAAAGGTGGATGAGGTTATGCGGTATCCCTGACTTGCTCAGGGGTATCGTGCACGGGGTCTGCTACCAGCCCCGTGAAATTTTCTTCAGCGGTACTGGACCGCTGGCAGAAATTGGTGAGTACGACGAAGACAAAGGTCTTCGAAAAGTAACTCTACGGACAGGGGTTCTCATGGGAGATCCCTTGACCAAACCGGTACTTCACTTAGTGAACATACTGGTGCGCCGAATCCCACAAATGTTGGAGGATGGCACGCTGCTGCAGAATTCTACGAATTTTGCAGAAGCCCAGGAAGCAGTCAAAGGAATGTTCCCTGGTCCCTAACTAGCTGGCTCTTTTGAGCGAAAACTAGGTTAAAAAAAAAAAAAAAAAAAAAAAAACACTGTCATGCCGTTACGTAGCGTATCGTTGACAGCAACGGCATG
>MVcefi1
GTGACTATTGGCATCCTAACCTGCCATACCGAAATGCAAGTAACCATTGACTCCCTCTCTGGATTTCTCCAGAGGGACGGACCTTTAAAGGTATTTAGTTTTAACTAAATACTATTTAACGGTAAGACCTTGCAAAAGGCATACAGAAGGAATTCCTTTCCTGTATATCCACTGGTTATGGATTCAATCTAAACCACTAGTTTTGTGTTTTGGGGCTAATAACCTCATAATAACTTTCTAGCTGCTGAGATAAGCAGAATAAAAATTCTAACTTATTACAACAAACTTTAACAAATATACTAAAATACTAATTAAAAATCAATTTTTAATTCAAAAATTAACTTTTAAATTAATAAATAATATATTCATTAAAGTCGACTATAGTATCATTAAGAATCACTTCCAAATTATATTTTCTTTATGGAGAAATAATGGTTTTATCCAAATGATCAAGTATATGAAGTCTGTTAGACTTCACATTACAAGATATATTTGTGGTAAACCTCTATTAATCAATAAAGATGGTGTAAGTTTGGATAGGGACGGATTCCCGAAAAGATTTTCAATATTGAAAACATTCTTAAATGAACCAGGGCTAAAATCTTCAGTTAGAGTTAAAAGATTAAGAATTATCTTAACTTTATTAATGATTACTAGGGGATTAAATCCTCTACCTCATGAACAAGAAAAGATAAAAGTTAATCTTTTACCTATAACTGAAGAGTTTAGTGGAACAAGACAAAATCCTGTTCCAACCTGATTCATCAAAGAGTTTGTTAAATATTATAAACTTTCGGTCATGAAACCCACTTACGACGAAAATAGTTACTATTTAAGTCCTAAGGGAGGTCCAATGGGTAAATCAACATGATCATCAATATGATCAATGTATGCTCTATCAAATGACCTAATCCTATCGATTCAGTACTTTTTAGGAACAAGTTTTAAAACAATGTTTTATGACAAATTCTTAAAGAATATGGAAATTACTTATGGTGTAAATTTACACCCTAAGAAATGACCTTCTGGAAAGTTAGGATTAGTTCGGGACCCTGAAGGTAAGCTAAGGGTAATTGCAATGGTAGATTACCATTCACAATTAGTCCTTAGATCTATTCATGATAAACTTCTTGAGAAATTAAGAAATCTACCATGTGATAGAACTTACACTCAGAGTCCTTTCGCCAAATGGGAAGAGAATAGTGAGAATTACTTCTCACTTGATTTATCATCCGCCACTGACAGATTCCCAGTAACACTACAGGCTAGATTGCTATCAGAAATGTTTAGCGATCAAAACTTTGGTAAGTATTGGGTAAATCTACTCTTAAACAGAGATTATCTCTGTCCCGGTGAACAACCAGGAGGTGACTCAGTGCGTTATGCAGTGGGTCAACCCATGGGTGCTTACTCGAGTTGAGCAGCATTTACCTTAACCCACCATTTAGTAGTTGCCTGATGTGCCCATAAGAAAACTAAGAAATTAGGTTTCAACCAATATATAATTCTTGGAGATGACATTGTCCTGAAAGACAATGATATCGCCATGAAATATATTGGAATTATGAGTAAATTAGGCGTGGAAATCTCTAAACCAAAAACACATATATCGAAAGATACATATGAATTTGCAAAGAGATGAATCCATAAAGGAGTGGAAATTTCAGGTTTACCTATGAAGGGAATCCTTATGAATATACATCATTTGAGAAGAGTTTACACAATTCTCTTTGATTATATTCAAAGAATCCCTACAGAAAGTAATCAGAATTCTCTGGTCCTTTTTGCTAAATCTTTATCGGGTATTAAATTCGGTAAAAGAATATACTCTGAGAGATCACTAATAAGAATTTTGAATAATTATTATATCACTCTACGTTATTCTTATGGAGTATTGACTCCATATGAATTACGTGAATATATTCTAAACCGTTTTAATACAGGTGAGGAAATAATACCATCAGATAAAAGAATCCTTGATTGATTCAAGGGTGTTATCTGTGATGGTGTGGCTGGAAAAGTGTCAACCCTAGCAAGGGGATACACAGCAGATGTCAATAAGCTTGAATCTTTTAAAAAGGTTCAAAATATTGGAGTTAGAGGTGGTGGAAACCAACTCGAACCTTTAATATCTTTTGAACTTGATTTTAAGAAGATAGCTCACGGACCTCTGCTGCCAGGAATGTATAACCATATCAATAAACTTTCAGAAAAGATGAGAGAATGAATGTACGGTGACGTCAAACTTGACGAAATCATACAAGAATTCACTCTACCTTCTGCTGATAGTTTATCGAGAAAAGATCGTGATATTAATTTAAAGATTGATGAATTAGATTCATTAATATTTAAATCATTAAAACGTCATTTCGATGGAAATCCATTCCCGGATCATTTCTATGGAGAAAGATCAAATGGGGATAGATATCTATACCCTGGTCTTTGTTCATTAGATGTGAATGTAAACCCACGTATAGGGTTTGAGGTAAAAAGTCCGATGAATATGATTCTTAACACTGAAATTAACAGACTAAAAGATAGTCTGTCAATGTTAAAGAATAGTATTAATCGGAAGCCTGTAACGAAGTTCTACTAGGGAGTAGTTACCCTTGAGACCGCTCATTACAGACTATTATATAATGTATTAGTTAGGAATAGTTACCTAACAAACCGCTTATATAATAAATTATACCTTTGACACTTTAAATTAGTGATACAGTACTTGACTGTGGTCTATGAATGAGGTGCTGGGTTTATCCATACCTTTAGCCTATCCATAGGTTAGAGTGCTGGGTTTACCCATACCTTTAGCTCTAAGGACCACTAATGAATTTATTATTTATCTCAATATGAAGTTTAACCCACAGAGGCATGGTGTCCTCTGTCAGGAAATATTTCAGACTAAAAGATAGTCTGTCAATGTTAAAGAATAGTATTAATCGGAAGCCTGTAACGAAGTTCTACTAGGGAGTAGTTACCCTTGAGACCGCTCATTACAGACTATTATATAATGTATTAGTTAGGAATAGTTACCTAACAAACCGCTTATATAATAAATTATACCTTTGACACTTTAAATTAGTGATACAGTACTTGACTGTGGTCTATGAATGAGGTGCTGGGTTTATCCATACCTTTAGCCTATCCATAGGTTAGAGTGCTGGGTTTACCCATACCTTTAGCTCTAAGGACCACTAATGAATTTATTATTTATCTCAATATGAAGTTTAACCCACAGAGGCATGGTGTCCTCTGTCAGGAAATATTT
>UMVcefi1
TGGTGGCTGTAACAGACGAGTCGAGAAGGGCTTTTGTCTCCTGTTTACATCAATTCACAATGTCTGAGCTTCAGGTTGGCCAGGACTTCCCCGAAGGCGTTGTCTTCGGCTGGATTCCTCCTGCTGAGGGGATAGGGGGCCTAAAGCCCTCTGACACTGTCCTAAGTTATAGATCCGACTCAGTCTCGAAGTAATTCGTGTGCTCAGATAACTGTGTAGCCAATACTGCTACTCCAAAAAGATCCTTAGAAGATCCATATTAAATTATGTGTCACATTGAAAGGGGTTGGCACCCTCTGATATGTTAAAATTCTGAAGTCTTTTTGGGTGAAATATTTTATCAATATATTATATTAACAAAATACGCCACTCAAAACTTCTATTATAAATTCCAAAACGTTTGAGAAAAAATCGTTCGAAATAATAAAATTTCTCAGGCTCATATTAATGAGTCTTTAAAAGTTATCATTCCTCTAATTTTGTCTCTTAACGAAAAGATGTTTTCCGATCTAAAACGGAAAATTGATCTATTAAAATCTATAATAGTTAAGTTGAAAGACGATTCAGAGGTACATAAGCGAAAATCTTGAATTACCCAAAAGGAAATTCATAGATATATAACTTTTGTACTGTGATTAACAAGACAGAAGGATCAGAAAAAATCATTCCATAAAATGGGTGATAAGTTCATATTTATCTGAAATACAGCTGGATCAAATTTCCTTTTTAAGTATCTTAAAGAGGTGATGCGATTAACTGTACGTAGGTTAGCAAATATTGAGCTTCACAAAAATCCTAAAATCTTTGTAAAGTTAGATAAGAATCAATTTCCAGCAATAATTGGTAAAGATATTACTAATTCTATCCTGAAATCAGGTAGAACTAATTATATTTTATTAACTGTTGCTGTATTAACCGTTCTTTCAGTTTTCCGTGTTTTACCAACAAAGGTTAAGCCTGAAATTTCAACTATAATCGAACCTTTTACAGGTATCGGTGAAAGTTTAAGTTCAGAACTTATATCTAAGGCGTTAAAACAATTGAAAATTAAAAGAATAGGGAATTTAAAATTGAAACTTAAAGGCTCTTTAAAAGCTGGTCCTAACAGTAAAGTTTCTCTTATGGGAACGTGTTTAGATGCTATGGCTTTTTGATATTACCCCAAACACTTATTTCACCTAATCAATTTCTTGATTCGTGTATATGGTGTACAAGGTATATTATATAGCCTATGACTAATTGTCATTATGCTCGTCACGCTCCCGTATCTACTCTCCGCGTTACTAATTGGATCTAAAAGTCTAAAATTAGGAAGATTATCTGTTGTATATGATCAAGCTGGTAAAGCTCGAATCATTGCAATAACAAATTGTTGAGTTCAATTGGCCCTTCTGCCCCTTCACGAAAGAATATTTCAATTCTTACGTAGATTGGAAACAGACGGAACTTTTGATCAAACAAAATGTTTTAATAGAGTTCTTTCTAAATTAGGTTATAGATACAATTTGAACGGATTTGATTTAAGCGCTGCAACAGATAGATTGCCAATATCTTTACAAGCTGACATATTAAATAATATCGGATTTCCTGGCAACCATTGAAAAAGTCTAATCAGTCTTCCTTTCTCTTTTAAAGGAGAAGAGGTTAAGTACTGTGTTGGACAGCCAATGGGTGCCTATTCATCTTTTGCTATGCTGGCACTAACACATCATGTGATAGTTCAGATAGCAGCGGTGAATAAGGAAATTCTTAGTTTTAGCGAATATTGTGTTCTGGGAGATGACATTGTCATTTCCAATACTGAAGTTTCACAAGAGTATTTGAACCTGATGGAATATCTAGGTTTAAAGATCTCAACACAGAGGAGTGCGAGAACATCAAAAACAAAAGGAAATTGTGGGCTGTGTGAACTCTCAAAATTCAGTCCTGAGTGTGAAGGTGAACTCCTTGAGTTGGAGTGGTGTTGCGGCGATGAGGAGTTGGCAATCGTGAAAGATGTCGTGAAAAGGGGGCGAGTCGACGACATCATGTTCTTTTCGCCCTCACTGTCTTATTGCCTATAAACAGTACTATGTTCCCTTCTGGAGATGGTGTTGTGAAGTCTAAGCTGCAGGTGCAGACACACAGCATTTGGGACGTGTTCCCCATCGTTGGCTTTTACGCCCGTCTGTGGTGGCTCGATGCCCTTGGTGGTCCTTTTGCTGTCAATCTACGTTGTTTATAACTGGTCTGATCGGCTATGCACCACGCACGCAACCTGACGGGCTTAGCGCTGAATTTGCCACAACCATTAAGCAGATTCAGAACCTCCGTGCCTACCACACTGGCGACAAGCTGGCCGTCGAAGTGGACATTGTTCTTCCCTCACACACCCCGCTAAAGGATAGCCATGATC
>AEVf-1
ATGGAGCTACTACGTCATCTAGACATCAGGAGCAAAGACCTAGTGTGTCGGAAGACAAAGAGGCACCGACTAGTATTTCGGGATGATGGACTCAAGTCCCATCATCCCGAAACGAGGGCCATGCTCAATTGGATGAAGAATCCAAAGCATGTGCCCACAAACAGGGCTAATGCCACCGAACAAAGTCAAACTTCTCTTGAACGCAGGAATTTGGCCAGATGGATGGCCCTACACACCAAACAAAATGTCCGTGTTGGAGACAACGGGGACACAAAGTCAATTTTTAAATACATGAAGAGTAAGGGCATGGGGAGCATAGCATGGACCCAAACTTGGGGTTATGACACTTACCAACGCACTGGTCTGTCCCAAGGATCCACACGGTTAATGTCTCAAGGACTCACAGAGGATCCATCCATGGGGTACTACAGTGCACCCAAGGAGTTGAGAGAGAGCACTTTTACACAGATTGGGAAAATGTACTTGACTGGAAAGCACACTGGATTACAAAACGCCAGAGACGCTATGATGCTGGCCAAATGGGTCACAATGGATTACCGTGTGCACCCAAGCTGTCCAGTTTACAAGTGGATAACAAACAGCCAAGAAAACCCCGTGGCCCCAATTGCTTATTTCTTCTACTACCTGGAGGGCAACCAAAAGATGAGAGGTGCTCTCGAAAAGAGAGGCGCCATCAAACCTGTCAGTGACTCGGAAAATGACATGTTCAACCTGATCTTCCTCAAACAGGTGTGTAAGAAAATAGCCAGATGGAGGGATTGGAAGCAATCCAAGTCTCAGCAAATGGCTTACATCAATGAACAAGGAGACATAGCAGCCACCACATCTGTTAGATGGTACACTCCAGAAGAGCGGATTGAAGGCGAGGTGTGCTTGAGCTTATCAGAACCTAGTGACGCCTATTATAATGACATTACGCAATTGAATGGCTCGAACTTGGGTTGTTGCAAGCTGTGCAGACACTGTGGAACCCTGAACATCAAGCAAGACTTGCTGTACAAACCATCTATCGACGTAGAAGAGAATCAGTGGTGGAGCGAAGAAGAAAATTATTGTGCGGAATGTCACTCCTATTTGGACATGCCAGACCAAGAGTGGGAGGACGCACACAATGTAGAGGATGTGGTCAATTACTTCATCTCTGCGAACGTTGGTTCGAAAGTTGATGAAATGGGTTTAATGAACTACCTAGATGGCGTTGATTGGCTAGGGGCCAGCAACACAAAATCCAATATCAAAGCCCATGATCTTCTGATCGTGAACAGTGCGCTTTCTAGGTTCAATTACACCACAGTGTTGACCGGACCCGGGGTCAGTCATGGCAACCTGCTAAAACTCCATGATGGATTTCCACACATTCAGTTTGCCGATGGCGCGGGAGAATTCGTTCCAGGACCAACCTTCCGGGCTTGCAAAGATGCCATGGTCTCTCTAACAGAGCTGCTCACTCGCAGGGACCAACACATTCATGTGCCAGGAATGGACATGGTTCGGAACATCATCAATAATGATAGGTTCACAACACAGCTAGAAAAAGCTAGTGTTTCCCTGATTGATGGAACTGAGGAGAGTCTGAACCTACATTCATTGTTATCACATCAAAAACACAACGATCTGTTCGTCATACTACTAAGCACTAGCGGACCTGCCGAGGTTGTGCAAGGGGAGACGTGGTTAGCCAACCATGCTGGAACGAACCTCATGGTCCACGCCGGCTCCTCCAGGGCAACGAATTTCACATCCATAGACTCACCTGGCTGGTCGGACAGAGGAATGATTTCCTATGAAAACAGCTGCTTCTCTAGCAGAGTAGTGATCACTCACGGACCGCTATCACTGGTGCATTACTCATCAGTCAAATCCAAGAAGGCCGTCATGATGCAATGGATCTTGTCAGAGGGTGACAAGATCAAAACCATGAAAGTGCCAACCATCAATAACCACGCTTTGCTCACAAAGGCCGGTCTGCCCATCATTGAGATGGAAGAATTGACCCTCCACAAAGCACTCATCAACAGCTTGTTGGCCCGCGCTGTCGCTGGCAAAGCAACCTACGAGGAACTTGTGGAATACGGAATCGCATTCGCACGTTCCAGGTACAGCTTGCAGGATGAGACTGTTTCATACAGAGATGTGAGTTTTGAACAAGTCTCGAGACATGCATGGGTCGCCCATTGCCTGATGGCCAGGGCTCATGCCAAGACATGGACAACTTCTTTCATGGCCAGCGCTGAAGGCCTGATGGGTTTGGGTTTGAGGTCCACTGTGACTGTCAGCAATTGGCTACTCAAGGCAGCCCACTCTGCCCTTCCCGACAACCTGTCAGCAGCACTACAAGAAGCTCTGAATGTTAATGCCACACAAATCACCCGCGGCAGGGACTCTCCGGTCTGGGATGAACTGGATATTTGGCTTAACACTAGACATGCCTACATCAGCAGGGGATTCAATGAACAAATTGAAATAAATGCTTGTGGTCATCACAATGGGGGGCCTTGCAATTGCCCAATCACCAGCCACACTTGCAACTGCTGCGGACAACCAACAGCCACAGATTCCGGCAGATGTTTGGGTTGTCAGCCAAAGAACCCCTCCTGCACACACAAACCCACCAATGTGGACTTTAAGGGCATGGTTATCTGCTATTGCTGTGGACTCCCGTTCACGCAAGGCTGTGACAATTGTCCTCCAATGATTGCAGAAGTGGACAGTGAAGACGAATACGAGTTGAGATCCAAAAGAAGCATCAAGAACCCCAAAACCATCACTAAACAGGAAAGGAAACCCCCTTCCAACAAGGCGCAGATCGTGGAAGAACCAGCACTATTGACCACACAACAGCCAACCACTCTGGTTTCTTCCGAGAGCAAGCCACGTGATTATGCCAGCGCGGCCACCCCTAAATCAGCCAAACAGCCCGAAAGTGTCACCCAGACAAAAGAGGAGTTGGAAGATTACTTGGTCGCAGCCAACAGAGAGTTTACGCCAGAAGAGAACATCGTGTTGTTTTCAGGGAAGGATTGCAACACCGACCTCTTGTACTCTGGAAGTAACAACAAGTATGCCATTTACTTGCACCATTGCCCTATGGGGGAGATCGTTACCATGTCCAACAACTTCACACTCCTAGGCTTTGACAACACCGTGCAACCTGGAAATCAATGCGGCCATTACTCATTCTCGATCTGCACCGATGGTATTGGGAAGATCTCAGATTTTAACAAAGTGTTGGGTGTGGCCGGTCCATACTCGGATCAACACCTTTTGAGAATGGCAAGACATTACAATTTGAACATAATTCTGTACGGAGGCACTTTCACCACCGTGCAAACCATGGTTCCGGGAGAGCAACACTACACCATCCAACACATCAAGGATGAAAGGTTCAAGGATGGACACTGGAGGCCTTGCACCTTATCAGTCAGGAAGAGGTGGACAGACAAGCTGTCAATAGCCACCATGTTCAACCAACAAGAACTGGACAGTCTAACATCAGAAGCGCTCGGGGAAAAGAAACACTACTCCACAGAGTTGCTGGAACCCCGTGATCTGTACACGGCCTCCAAGCACATCAAAGACTGTGCGGGGATGCTAACCAGCAATGTGCAATCCACTCTTCCACAACTGACAGAGCGTAAGGGCCAATGGTATCTATCCAATGGCAACACCACAGACATCGCCAGAGGTCTCATCAACCAGCCAGTGCCAGGATGGGCACTGGGAGCTTTGGAACCCATCAACTTTGACATTAATGACAAGGTGAAACATCTAACGGTGAGGGGTGCAGTTGACAGCACAGCTGATAGCGTAGTCAATGTGGACGCCACCCTAGATGGGGTGATCAACCTTGCATGTCACGACATCATCAGGACCAGACTGTTGCCAGAGCAAGATGTGAATTCCAACCTCAAATCATCTGTGAAAATTATTGACCTTCCGACAAGAACGCTATCCAGTGGAATTCTAGCGATAAACTTGGAAGGTACCAGACTCAAGCAGTTGGACGAGATTTATGTTAAAGAATGGAAGACGATCATTAGTGTCAGAGTGAAGATGATAGAAGGTACACCATTCTGCATCACTCCCATGAAGTCTTCACTCAAGAAGGGAGTGGTCAGGGTTGCCGTTCCATCATCCAGCGTTGGAAGCGCTTGGAGGGTAATCATAGCTGCTTTAACCACCAATGTCACTCAAGGTCACTTTGATATGACTCTCAAGCACATGAGAGGAGTTTCAGCCATATTTGGCTGGGGCAAGTCCACCACCATGGAAAATGGCCGACATGAACACAACCGTGGCGCAATGACCAGGGGCGCGCAAACCGTACTCAAAGGGAAACTGATCGAAAGTGGGAATCTAGCCACCAGAGCCAAACCGGGAGCTATTGTAATGTCAGCAGAGGCAGCTTCAATGAGGAAAGTGGTAACAAAGCGGCTGATTGTCGATGAAGCCTCCAAGCTGGGGCCCGCGCAACTGTTGATGATGCTCACAGACAAAGTAGAAGAGGTGGTGCTGTTTGGAGATCATCTGCAAATCGGAGCCAGAGACATGAACGCCACTCCCGGTGAGAGAGTGGCCACAAGTTGCTTGGATCTGTGCAACAACGTAGAAATTTACAAACACACCAGGCGCTTGGGGGCCCCACTTGCAGAGGAGCTAAAGAAAATTCCCGCTTTGCAAGATCTTACATATGATGCAAAGATCACAAACTTCTCCACGACAACAACAAGCAAATACGACAGCACCATGATCAATTATTTGGTGCAACAATACCAAATTGACACCGTGTTAACACATTACCAGGAAATGGCAGCCATGCTCAGGCACGACCTCACAAACATGGTCAAAGAGGGTACCTTGGTTGTTAGCACAATAGATTCTTTTCAAGGCCAGGAAAGTGAGAGAGTTCTGATAGTTGCATCCCCCACAGCCAACGGGACCAGACACTTGGTTGACGATTTCGAGTTCAATGTGAGCGCGGCATCGCGAGCCAGAAGTTATTTGCACTGGTGGTCGATCAACTGCCACCAGGAATCCACTCCACTCCACTTACGCATCCTTGGATCAATGGTGGGCGCAGGCATGCCCGGAGGATTCCCCGATGAGGACGGACATGATGACATGATGGACAACCACATTATTGCTGAAGAGTTGAACGTTAACATAGCAACCGAGACAATGCAGACGTTGGAGCATGTACTGAGAACAAAGACCAAAGAGTTTGGTTGCACTTACAAGCTTTGCAACAACCCGTCAAACCTAGAAATTCACATCATCAAGAACTTCGGGCCTCTGTCAACCACCATGGCAACTTATATGTGGAACCATGAGGCTAAGACCTCCACCCTGTCGGTAAGTGCTTTGGCCCCCATCAGTGCTTTGGAGTCTGAAGCTCTAAGACGTCAAATGGACAAATTCATGGAGAAAACCAACCCACAACCAGATGAGGAACAAGAAATTGCCAAGACTAAAAAGTGTTGTCACTCACCATCAGCAGCTGAGACTTACAATGAAGACATATACTTCAGCACCACAACATCTTACAAGCTCAAGAATTTGGCCTATCTTTGCCAACAATTCCAATCCACTGGCAACAAACTAGGATTGTACACCAATACTGGAGTGTTGGTAGAGTTAACTTCAGGCGGAGGGTGCTCCAGTTGTGGAGGCATAACAGGAAGGAGAGTAGATGGCACAATGATCATCAAATTATCATCCGATTATCAAAGACTCGGTAAGAGAGGAATCACTGTGGGCCAAGATGAGGACGTACTTGCCAACTCCATAATCATCATGGTGGGAGGCTACAGAGGGCCGACTGACGCCTGGATCAATACAGTGCCAATCGATGACATTCTTAGATCTAGATACGTTTGTGCAATAAACATCTTTGAGCGTGCACTCACGCTGGGAGTCCAGACGGTCATGGACATTGCAAAAGCCGATTCACCCTTAACGTTGGAGAACAGATATCAAAATGTCAATTCTCAACATTTATCAGAGGGAGAGAGACTTAAAAACAGCCTGCTGACGTCATGTGGACTGGACAACAACATCCACGAATGGTTTGATATGTCAAACAAATTGATGGGCCACATGAAGACGGACCATTTACCTTGGGTGTACAGAACAACCGACGGGTCCTTTACGCTAGCATTCACTCCAAAGACGGGATCATTGTTGCAAAGACATGAACCATCTGACTACAGACAGATCATTCTAGACTGCATTAGAGCACACATAGACAAGACTTCTATCATTAAGGAAGTGCAAGCCATTATTTCAGACATTCACAGCAAACGCAAAGTGGGAGCAAGAATTAACGGATTGTTGCAGCCAATCTCACAACACAAAGATGCGGGTGATGAAATTTACAAAACTCTCCAGAATTTTGCAGCAAAAGCAGAGCTAGGAAAACTCAAGCACATGCCCAAACCAGTGTTCATGACCAGGATGGGAATGAATATGATGGGGGATGCAATCAACGAAATGCATCCAAAATTAGCAGTGCAAGAGCACAATATGACTCATGGGCATGATCCTTTAGGTCAGGCTAGAGAAACAGCAGCTAATGCCTGCAGAAGAAGGGACCGTAATAACGTTGACATACTGACACAGCGGCCAAGTGTTTACTTCGTAAACTCCTGGTTCAACAGCAACCTAATGACACCTAACGATGAAGACCTGCACAAACATTGGTTTGACAGCGAAATGGGGCTGTGTTATAATGTCTTATCAAACATCGCTGGGCGCATAGGCGCCAGAGAGAAAATAGATGAGACCAGCTCGGCCATGAAGATCGCTGTGGAGTCGTATAAAAACCAGTCCATGCAACCATTCATCTCAAAAGAAAAACAGCATAAGGCTCTGGAAATGAACGATGTTTGGTGCACCATGACACCAGGCGAAATTATCTCAAAGATCATTGACCATGGATGCAAAGAGGCAACAGGTTGGTTTAGCTATGACTTTGACGGCACCCACCAGGCTCTCAACTTACCAGGCAAAGGAATGGCTAGATCGCAATGCTTGACAGGACAAGACATTCCATCCGTGTTATTGGACTCTCACTTCGAAATGATAACAACTGGGAGAGTCAACAAAACCAAACACGAAGAGCACACATTGTTGATTGAAAAGCAAAGCACTTTCTCAGGGGTGCACCTAGTTAAACTCATGGTGGACAACACACGCGACAAATTCTACCACATTGACCACCAAGTAGTTGGGAGATCCACCATCAATGTCACCATTCCGGCCCTACACCCTAACATTGTTAAAGGTATCACCACTGGGCAGCCGCTTCTGACAAAGAAACACTGCGTTATGGACAAGAAACTACTGGAAGCGATGATCATGAGAAGAGCCAGACTGAGCTGCAGCTTTGATGACCTCCTGGAATACGGACGATCTCAAATGATGACCAGATATTACACTACGCGAGGTGTGCAAGACAAATTTAGCCTAACCACTGAGAAATGCCATGACATGGCTGTCGCGGCTTGGTGTGCCGGGGGGGCCTTAACTCACGACATCACCTCTTACAAAAATTACAACCTGGAAAAAGAGTTCACTCCCCAACTGCTGGAAACGATCAAGCAAGTGTGTTGGAGCAACGTTAATTACTCGGCGGACAAGTTAGCCGGTGTGGCTTCAATGGCAATGACCATGTTCGGTGGAAAGTTGAGCGAGTTCGACCTGGGTGACTTGGTTAAATCCTTGGATATTACAAATACTATGGGCACAGCGACAGAGATACTGCAGTCAATGCAGTTGTGGAAGGTCAACTTACACAGCGGTCACGGGAAAATAGTCAAGATTGCCAATGCACCACTTAATGTTGTGGAACAGGAAACCAAGCGATCCGGCCCAGTGTTGATAGCTGGGATGGGCACTTACGGAGATGTCGCCATAATGAGACAAGTCAAGAAGATGGTTGAGCAAGCCGGGCTAAGCACCGTGCTTGCTGTGCCGAAAACTTACTGCTCTCCTTCAGAAGTGTCTCTGAACTTTGATGCCATCGAGGCGGCGAATGAAGCCAGGATGTTAATTGAGAATCCATTAAAGTTGATCAAGCAAATGTTAAATGGGAAGAGATTTATGTTTGCAGATGACGTCGTTGACAAATTGAGTGATGTAGAGTCTCCTTCCCTGATCATCACTAACGCAGTCAGCCCGCAAGTGCACATGTATGCCAAGGCCAACAACATACCGACAATAATGCTGAATGGAATGATCATGCGTGGGCATCTGTTCCCAAGTTTAGAGAAGTATGATTTGACTGTGCCAGATTGCGCCACCAAGACAGCACTGTCCATGGTCTGGTCCATGGCAGTGAGAGAGCAACAAGAATACCACAATAGTGAAGGGAAAAACACGAAGGGATGGGAAAGCCACGCTACCACCACCATCCTCAGTCACCCACTATTCATGCAGATAGAGAGCGATTCTCCCACTGTTAAAAATGCCGGATACCTGGGGTACAATGACACGGAAGGCCTGCAGGAGGAGGATGTACCCACCCACATCCTATTCACCATGGGATCAATGCGAGGCAAGGCCGTGTCCACTTTGATGGAGAGAGTGTCACACGTCTCCAAAACTCTGCACATGCAATTGCTAATAATAGAAGGGGCTGAACCAGTGCCTGCCAGGTTGCGAATGGAGGAACATGTGATTGTTCGTGGCAGAACCCCACTGGAAAGCGTTACCCCACACTCTCGGTTTGCCATAACTCATGGAGGCACTGGCACCATAGCCACTCTCATATGTGAGAAGGTGCCAACAATTCTAGTACCCACTATTGGTGACCAGTTCGTGTGGGCAAGCCATTATGCCAATGCACAATTGGCAACGTCCATGTCAATTGAGAGTAACATCAAGGAAATAGAGAAAGCTTGCAGGTCCATCATGTTGTCTCCTGTTATGAGAAGACTACAAGGTATACGACATCTAACAACGTTAGAACGCTCGATGGAGCACGGGCGTAAAGTCATTTTCCAAGCGTTGTTAGAGCAGGGTTTGGAGGTCAAGGAAATGGTGTCAGCCAACACTCAACAAAGACAGAATAAAAAGCCCAAGCCCATGCCCGTGGTCCAACCAATGACAAAAATCGTGCCTAAACACGTAAGGCAGATGGCGTTTGATCTAGTGCATGACTTGGAGCCACTGGACCAAGACCTCAACATGGCGTGTTGTGGTCAGAAACAGACCAATGATACCATAATTGGCCAATCCGAGGAAAATGATTGCTTCATCACTTTTAATCACAAAGAAAAATTAATAAGCTGGGTCACTCGAAAGCATGAAGTGTCCTGGAGACAAATGAGCTTCCACCGCCAGCTGGGACACCCTTGGGTCAGCACCCTCAACAACCACTCTCATGGGAGGGTGTTGTTTGCTGGAGTCAAGCTCAAGTGGTTGCGCTCCATTGTGTTACCGGCAAACCAACCAGTGGACATTAGCATCACTGAGTGGGAGAGGTTGAGTAATAGAGAGTCCAGAAAGTTCAATGATAACGGGGCACTGGAAAAGATCACTAAGAAGGGTGTTTGCTCTTACTGCAAGAGGACCAGACACATGATGCACGATGGACTTTGCAAGAATTGTTCCAGTGACAAGAACTTCTTGCAGCCAGGAGCAGAAGAACTGATTTTCTCACTAGGCATGTCGGATGAGGAACTACCAGTCATGGCCAAAACCCATGGATTCGTGGCAGAAACTCTTCCTGCAGACAGCCATGAGGAAGAGGATTTGGATTTGACTGGCATGTTAGCACCAACAACACCATCTCACAACCTAGGAATCATGACCGACTTCCACCATACACCGGTCCCACCAGGGGTGTACAAGACAGGGCCAATCTTACACACAATTCTGTATGATCCTGTTGGAACAAATGACACCTGTGTGCTAGATTGCTTGAAGTTCAGCCTAGACATCAACAGGGCTGCGGCTGGATTTGACAACATCAGGTCATTCATAACAGCACCAGGAGGTGTCAATCAAGGTGAAATAGTGGGACTATTCCTGGCATGTGGACTCAACCTAGTGTTGCACACAGACACAGAGACCACAGCTTACATTATGGACAGTAAGTTACCTCTTGCCAAAGTGAAACTAGTTGATGGTACTAGAATATCACACTTGTTAGTGGTGGAAAGCAATATCAGGTGGATTTGCAAAGAAAGGATCACAGCCCAACAACAAGATCACAAGGTTTATGACATAACTGAACCCATACACACCATCACAGGAGCAGACATTAAGACCATTAATGACGCCAGCGAGTTGATGCAAAGCATTCTAGATCCAGACAACAATTCAGAGGCTTCAAGAAACTTGACGGCTAGACTTAAGATGAGCAATTACAAGTCTGTCAATAAAGAAGAAACAACTGCATGGTTATAA
>AEVf-2
ATGGCGCGCGCTCACGCAAATGTGTGGACAACAGCGTTCCTGGCCAGCGCTAACGGCGCTGTAGGCCTGGGCATGCGGACTGCAGTTACAGTGTCAAACTGGCTGCTCAAATCCATCGAGAGAGTCATTCCCAGTGAGTTCCACTCCACCCTGTCTTCCCTAGATTCCATGAACTTAACTGCCATCAACAGGGGGCAGGAGAGCGCCGTGTGGGACGAGCTTGATGTGTGGCTGTCCACCAAGAAAGTACAATTGAGCAAGGGCTTCAACCATCAGCTGAGCCTGAGTGATTGTAACCACCACAAGACCAAGGGATGCAACCAACCCAAGACCGGCGAAACCTGTAGCTGTTGTCAAATGGACACCGCCGACCAATCGGGCAGATGCAAGTGCTGCTATCCTAAACGACCTTCATGCACGCACAAACCTGACAACGTCAACTTTGACGGTGAAATGGTCTGCTACTGCTGTGGACTACCATTCATTGAGACATGCAAAGCTTGCCCTCCACTGGTTTCAGAGGGTGTGAAGGAAGATGTGAGCGTAAGCAACCAAGGTGAACTCGTCGCCAAATCTCACCCGAACATTGGCGGCAACCTGTCCACTGGTTGGCCTGACCCACGGGGTGGCAAGCAACACAACCACAAGTGTAAGACTTGCGGAAATGTAGTCACACACGAGCATCAGTTCACAACTTTATCACATGTGCATCCAAGCTCCATGTGCCCAGTGTGCTACCCGAACGACCGAGCTGAGACCCACCATGTAACTGCATCATCCGAGCCAACACCTAGAGAGTACGCAGCAGCGGAAAGGAAAGAGGAGAAGCGAGTAGCAGAGACAAGTGCTGACAAGAGGAAGAGGGAAGCGTTAGTGAAAGCTAATGCCATATTCAGCCCATCAGAAAACCTAGTATTATTTGGCAAGGACAAGTGTCCTCCAGATGTGCTATCAAGCGCGTCCTCTGACAAATGGTCGATCTACCTTAACTACACCCCCACGGGCGAGACTGGGTGCACCAGCAACCACTTCCTGTTGAACGGATTTGATGCTGAAGTGCAACCAGGCGATCAATGCGGGTTCCACGCTTTGAACACGTGCACCAAGGGAATGATCAAGCTGAGCGACTTCAACAAAGTGTTGCAAAGGACCGGTCCTTACACAGACCGACAGCTGATAAGAATGGCGGCATACTACCACATCAACATTCTAATCTTCGGAGATGTCTTCTCAATGGTGGTTACAAACTCCCCGGGAGAACCCCATTACACAATTCAGCACATTAAGAACAAAGAGTTTCCGGAGGGGCATTGGCGACCATGCCAACTGTCCTTGAAGGACAGGTGGACTGACAAACTGACAACCAGCCCAATGTTCTCCATCTCTGAACTAGACAGCCTGTGCAGTGAGATCATGGGCGCTAACACGCACTATTCCACAAACCTAATGGATGAGGCCACGCTGTTAAAGTGTGCCACACACATAAAGCACTGTGAGGATCTGATGCAAAGCAAAGTTACAGCACAACTCCCGCAGGTATACGAATCAGACTCAGATTGGTGGATCACGAATTCTAAATATGACAACATGGCAACGGGAGAGATCAAGATTGCCGTCCCAGGGTGGGCCAAGAGCGCCATTGAGCCGTTAACCAAGACCGGAAGAGAGATGGCTGACCATTTGAGCATGGCTGCCAAGGTGAACGTTTCCCCGGAGGGCCTCACAGACGTGGACAGCCTGTTACACAACGCCATCACCATGGCTTGCCATGACATAATGAGAGTGAGACTACTCGCGGAGCTGGAGGTGTCAGAACAACTGAAGGCCAGCTTTAAGATTCATGAGTTGTCCACCAGAAAACTAAGCACTGGCCTGCTGGCGATCAATTTGTCCGGGACTAAGTTGAAGCCAATGGATGAAGTGTACATTAAAGAATTAGGAGCCGTGTTGAGCATCCGAGTCAAGTACCTGAAGGACGTTCCCTACTGTGTCACCCCCATCAAGAACTCTGTTGGCACCGGCAACATTAAGGTGTTGGTGCCAAACTCCAGCGCCGGGAGCGCGTGGAGAACGATTAAGGCAGCTCTGACATGCAACATCAACCAAGGAAAGTTCAACGATGTTCTTCGCAGCATGGAAGGGACGTCAGCAGTGTTCGGCTGGGGAAAGTCCACGCGCATAGCGCAAGAAGCCGATAACGACACAACGGTAGTTGCAATGACGAGAGGCGCTGTGGAAGTTCTCAAGGACAAGCTACTCAAGTTAAACAAACAACCAACTGTTGTCAAAGCCGGCACCAGAGTGATGTCCGCAGAGTCGGCATCTCAATCTAAAGTCATGACAAAAACCCTCATCATAGACGAAGCCTCGAAGCTGACAACTGACCAATTGTTATTGATGTTGAGCGACAAAGTCAAGACTGTGAAGCTGTATGGCGATTACTTGCAGATCGGGGCCAGAGACATGAGCCAGACTCCAGGAACCAGGGTGGTCTCCAGCTGCCTGGAGATCTGTCAACAAGTTGACGTACGGAAGCACACGCACAGAGTCGGCCAACCATTGGCGGGGGAGCTGGCCAAAATACCACAACTAATTGATTTAACTTGCGATGAGGACAAAGTCACCAAGTTCGGAACGACCACGACTGCCACCTACGATAGCAACATGAGCCGGTTCTTGGTGGAGCAGTACCAGATAGACACAGTCCTGACCCATTACCAAGAAGGAGCTGCGATGCTGAAGAGAGATCTCCAAGATAAAATTGATGACGGGAGCCTCCGGGTCAGCACCATCGACTCCTTCCAAGGTCAAGAATCGAACAACGTCATGGTCGTCGCAATGCCGACGGTAAGAGGCACCCGTGGCCTAATTGATGACTTCGAATTCAACATCAGTGCCGCCTCCAGAGGAAAGTCGTACCTTCATTGGTGGTCCATCAACTGCCACCAAGAAAGCACCAGCTTGCATCTACGCATCATGGGATCGACAATTGGCTCTGGGTTGCCTGGGGCGTATCCAGATGAAGAGGCCATTAGATTGATGGAAGTTGACGGGTTCACAGAGGACGGGCAGCCCTTCATGGTCGGGAAGGAAGTAAGAGACTCGCTAGAGGACTCCATTCACAACCAAGCCAGCAGGTACGGGTGCAAGGCAGACATCAGCTCGGACCAGGACCATTTCAGGGTCGAAATCAGAAAGAAGATTGGATTCATGAACACCGTCATGGCGACGTACCAGTGGACTTTCAATACAGCCAGTTCTGTTATGAGTGTTAGCCCCTTCGCTCCGATCAGCAGCGAACAGGCCGACAAGCTCCAGTCAACCTTGGACTCGCAATTGAAGTGCATGTCCGCTCCCTCCTCGCATGTGGATCACAAAGTCAAATCGACCAAGTGTTGCCATGCAGAATCAGCAACAGAGAAACATGCGGAATACCTGTTTGCCAATCCCTTGAGCAGCTGGAAGCTGCGCAACCTGGCTTACATCTGCCAACAATTCCAGGCCGCTGGCACAAAGCTGGTCCTATACACTGAGAAGGGCCATGCCGTCACCATCTCATCAGGAGGGGGTTGTTCTACATGTGGTGCCTTGAGTTTCAGAAACGAGGCACGGTCGGCTAATCATGAAAATATCCTCAGATTACCAGAGAATGGGCAACAGAGGAATGACCATCAGCCTTATGAGGATGCGATAGCGAACAGTTGTCTACTAATGGTAGGACACTTCAGAGGACCAACAACAGAAGTGATGGTCAGCGACTCTGTAGATCATCTGCTCGACTCCAAGCGGCTGATGGTCATGAACCTAATGGAAAGAGGCCTCACCCTGACAGGACAAGTGGTCAACAGCTCACTGAAGCGTGAGAACAACACCAACCTTGAAAATAGATACATCGATGCGAACACCAAGCACATTGAAAAAGGGAAACAACTCATCAGACAGGCCTTAGCCGCGAACAACATCGACCCTTGGTATGTTGACGAGTTCGTGTTGACCAACAAGCCCGTAGGGCACATGTCCTGCGACCACTTGCCGTGGGTGTACCAAGCTAAGACTGGCAACCTTTCCATTGCGTACAATGGAAAACGGGCGAGTGACTTCAACCCAGCGCCATGGCAAAGCTTGATTCTAGAGTCGATCATAGAGAAGTTGAACACTAACACAGTAATGGGAGAGTTCTCCAAGTTCTTAGCATCTATGGTGGACAATAGAAAGGTGGGGGCGAGAATTGCGGGCTTATTGGAACCAGTGTCAGCGCACAAGGACGCAGGGGACGAGATCTATAGGGCCTTGCAAAACTTTGCTGCAAAATCAGAAATGCTCAAACTCAAGCACACCCCACCGCCTATATTCATGACCAAAAAGGGGATGGAAATTATTGGTGACACAATAAACTCCTTGCACCCGAAGCTGGCCGTCCAGGAGCATAACATGACACATGGCCAAGACGCTTTGGGTCAAGCCAGAGAGACGCTGGCGGCGGCAGCGAGAAGAAGGGACAGGAACGCGGTCAACGTAATCACCCAGAGGCCAACTGTGTACTTTGTTAATTCGTGGTTTAACAGCACCCTCATCAGCCCTGAAGAGACCTCGTATCATAAACACTGGTTTGATCAGGATCTAGGCATTTGCTACAACGTGTTATCTAACATTACCAGCAGGGTATCAAGCAAGTCAGAGCAAGGCGAGCTGAGGCCAATAATACAAAGAGCCGTCCAGGCGTACAAATCTCCGACCATGCACCCGGTCATTTCTGAGCAAATCAGTCACATGGTCACGGACATGAATGACACATGGAGTATCATGACTCCCAGTGAAATAGCAGATCACATCAAGGCAAGCAACGGGGAGTACGTCCTGGGCTGGTACGGTTTCAATCCCGAAGCTAGCAGACAGAAAGTGAATGTTCCTGGAAGAGGGTGGGCCACGGTCCAAGCCACGACAGGTCAAGACATACCAACGATAATGCTAGACACGTACCTTAACCACATGGAAACCGGAGTTACTATTAAAGTGCCGGGAACTAAGGACCGCATAATGATAGAGAAACAGTGCAGTTTGGCGGGAGTGCATCTTGTCAAGATCCACCTCAATCAAAGTTTAACCAATTTCTACCACGTTGACAACAACGAAATAGGGACGTCTACCGTTACGGTTGACATCCCCACTATCAACTCCAATCTGATCAGGGGGATCACAAACAAGGTTCCTTACTTTCGAAGAAGACAACCAAGATGGACAAGAAGTTGCTCGAAGCAAGGATCATGCGCCGAGCACGAACAGATTGTCAATTTGACGACTTGTTGGAGTACGGAAGATCCCAAATGA
>AEVf-3
ATGAGACGGGTGATGAACAACGGCACTGACGTCTTTTCTGACGGCCCACTCGCGGCCGTCATGACATACGTCACGAGTATACTCATGGATGAATACGGTACATGTCACATCGAACCCGACTCTGCCATCACCGTCGCCGACAGTGCGTCACTCGGACCGTTCTCCTACACTGTACCCAGCTGGTGCGAACAGTCCCGCCTCACGTGGGCGACGTCTTCCACCATCGCACGGAAAATGCTCGAACGATTCCGTTCCCGCGTACCCGCGTCTGATGTACGACACGGCCGGCTTGCCGATCTTGAACGAAGCCTGGCCTTCCGCGAAGGTACTTACGGAACCGTGTCCGGGGACGTCCAGCGAGTTGTGACGCCACACGTGCTCAGCCTCGCACCCAACGATCTGTCGCGACACTACAGCAACTACGCCGGCAAGACGTACAGTTTCGTCACACGCGACATCGTGCGCACAGCTCACGGAAGCGGATTCGTGCTGCCGCATTCGGACCGCTTGTTCCTAATCAACAAGCATCAACTGGCGTCAATCGAAGACGGACGCATGATAGCGGGAACCGACCTTCGATGGCACACAATCGACAACTTTGAGGGCCTGCGGCTGCTGAGACTTTCAAAACAACGTCTGTGGGCCCGCAACACCACGCAGCACTTAGCCGACGCCACTGTAAAAATGCCCACGATCAACATCACCTTGCCCGAACTGGCAAGAACTGGCGAGCTGTTCACGCACAGCACGCTGAGAATCAACAAAAACTTCATGACGAACCTGCGCAAGCGTCTGCTGCTGAAACCCACCGATAGAGAGGATTTGTACGCGTACGCACGCACCATGATGCAAACTGCCGTGTACATGACCACCGGAGCTGCGTCCAAACGCGTGTGCACCGCGCGCGATGTGGAAGGCATGGTACACTTAGCCCTCATCATGAACAGTTACGAACAAGTCGCGTTTAGCGGTACGAAAATCGGGAGCTACGCCGATGCTGAACTAAAAGATAACATGATTGCGCTCCTGGCTCGGTTGTGCGACGACGGAAAACGAAATGTCGACGCGGTCGTCGCACAGCTGTCGTCGATGGTGCCCCACGTGTCCGACCTCGCGCGATCGTACAGGGACATAGCAGCCGTCTTCAACGATATCATGCGACATCTATCGTCCGTAGACGGCGATTTCATGGCTGGCGACGAAATGATCACCCCACGCGGAAGCGCCACGATGCGTCCCAGGATCAAACATTTACAGCGTGTAAACTTAAACGACAAACACGGCGCCATCGCAGGAAAAGACGAATTTGCCGGGACTCGGCCGTCTGATAACTTTTACAGCGATCTGATCGAGGACCCCGCCGCCGCCAACGTCGAGCGCTTTGCTCGCCTAGGCCGCGGTGACGCGCATTGCGAACCGCGCTGGACTCACGCTTTGATGGGCAGTGGTAAGTTCGCTGTGGGTCGTGATTGGCTGGCGTTCAAAAATACGCACTGGGTCAGCTCCAAGTATCTCAACCAGCCCGCTTTGTCCACGACGCAACAGCGGTTCTTGAGCACACTCAGCAATGCCGTCGACAAATTAGAACACGCCGACTCTTACCACCTGTACTCCCTGTGCGACGGAATAGCTAGCCGCTCTCCGGCTACGGCTGGACCAGGGCGGAACCTACATGTCAACATCGGCGCTAGCGGATCCTACGATCCGCTCGGCTTCGTGTCCATACTTCGAAGCGACCCCGGGCGATTCGGCGCGTGCGCACGAGTTATCGTCGCACACATGCTCGTAACCAGGCGACAGGGATGTACCGTGTATATTCGCAGTGGGCGACCCGGGCCGCACGTGTATTGGGCCGAAGCCGCGCTAGCCGAGACTGACGACGAACGGCTGTCAATGGGCAACACAGTCGCTCTTCCGTTCACCACATTTGGTCCGTTCCTCGACGGTATGCGCATCGTCAGCCCGCTACAAAACATGGACGGATTCGTCAAGAACAACATGAACTACTATTGGCTGTACGGGATCGACGAAGCAGACCACACTGTGTTCAACATAAAAACCACGCTAACGTGGGAGCGCGCCACGTTCCCTTACTCGAATTGGTTCTTCCATGACGACCGTGAAAACGTTATGCACGGAATCGACGCCGTCACGGTCGCTACGCGCGCGCCCGGCGCGCTCACCGACGAACTCGTGATCGAGGGCACGCGCAACCCCGAAAATATGGGGTCGTTGATCAAACTTCACGATCGCGCACATTCGGGACCAACACGCTCGGGCGACTCGCCTTCCGCCCTCGCTAGCGCGTGGGCAGCCGGCGGCAAAGCGCCGCGAGGAGACGTCAACAAAAAGTGGCTGCCGTACCGCACGACCAACCGCGGAACAGGATGCATCGAAGTGTATCGCGGCACCGCGTCACCAGGAACTGTTGTTTACGACCCCCACACCGACGGACAATGCGTGTGGCACTGCTTCGCACATTATGCACGCCACGCTGCTGATTGGGACGACGCTCGCATTGTCCAAGCCTATCAATCGCTTGCGCCGAAGACCTTCGAAACCGTACAGGACATCGCGAAATACGGCGTGGCCATGGGATTTAGCACCAGCGTCACGACACCCGACGGCGAATATTACTCCGTGCAAATTGACGGCAGTCCTAGTTTGTGCCTACACGTCAAATACACGATGGGCACTTACTTCCATTGTACCATCGTTGAACAGCACACCATAACAGAACAACGCCGCCAGAGGGAAGATACGATTGACGTCGCTGGACTGTCCGCCGCAGCCGGCAACGCTCGACTCGCACAACGCCTAATACGGGACGGCCTCTCTGGCCGTGCCGGGGGAGACGTTGCCAATGCCATCGAAGCCACACGAGGCCCTATCTGGCCCCGTGCCGTCGTAATCGCCCAGAACCCCGATTTGCGCACAAAAGGTCGGGACGGCACCGACGAATTTATGCAGGTGTCAGGCGCGCAACCGGCCTCCGTGATCGCCATCCCTGGGAGTGAAGGGTTGGACTTCAAGGTTGCCTTTGAGCACGCCGGACGCGTGTGGATCGAGCATCCGTACACCGATGTGTACATTGCATTATCCTTGCGCTGCAGCGTAGATTCTCTCGTGGCGAGGAACGCGCGTGACGACAAACCGGCTTTGGTCGACGTAAGTGGAACGACGGACGCGCAGCCGAGCTTTATCAACCACACATCAAAAACCAACGCCGCGCCCGAATTGCAACACCACGTTGTCGACTCGGCCGGACGTCCGCTAATAGTCGTCGACTTCGACAACACGAACCACCACGGATCCGCCGCACATGACGACCTCGCCGCACGCGGGTTTGACGCGCTCATTTTGCCGGGTGAACACATGGACGAACAGACATGCGACGAACTGGCAACGCAAGGCATGCTCATCGCCGGTGTGACAGGCGGCAAGTTGCGTTACCGCACGTGCACCATTAACGACGACCTGGCCGCAGCCGTGTACTATGACAGTGGCGTGCATCACGAACAACGGCCCACCAAAGCAGCACTTGAGGCATACAACCAGGGATGGGCTCAAACGCGCGTCGGAAACAGATACGGATTAGGTCCCGCGTGCAACGACGACGCGTGCCCATGCAACCAGGTCGCCGACAGCTTAAACGCCACAGGCCGCGCGCGTCTGGAGCTGGGCCGGGCCGAGTCTCGCGCGCTACTCGCTTGCACCGGCGAGACAAGCTTTGACCTAACGCACAGGACAGACACGCACACGCGACTGCAATGGGTGTTCCAACTCAACACTGGCGATAGTGAGTGCGAGATCTACGAATACGCAGCGGACAAATGGATGTCCACTTTTGACGTGTTCGCCGTCGGATCCGGACACATGCTCGTGAGCGAGTTTGCCGCCCACGTCAACTCGAAAGCCTACTACGACTACAAAACCGGACGCACCACGAAAACCGAGCGTGCGCCCGAACCGCGACCGAACATGAACGATCGGGTTGACGCCGTCAAGCATGCACTCGGCGACAGCGGCAGCGCCCATACAATAAGCGCCGAGGCGCCCACACGGCGAGAGTACGAATACATCGAACACATGGACGCTAGCGTCGAGCTGCTCACCGACGAATACCACGAGCGCATCGCCGCTAAAACGATGGATTACTGGGACAATAACACGGCCCTGCTGCCCACAGTCGCCCCCACCCCACATGACGCCGTTAAATTCAACGTAAAGGAGCACGACATTGAGTTGAAAACTGTCGGCAAAGCGATACTCACCCCGTACCCCAGCCACGCGCAACCGAACTATACCAAACGGTACCACGCAATGCAGCAGGCAGCAGTGGATTTGTTCGGGAAATCTTTCAAGTTGCGCCAGGTTGAACACGACCCGGAAGCCGACGCGCGCGAGCTTGTACGCACGTATTTCACCCGCAGCGTCCCATCTACCGAAATCATCACGTTTGACGCGCGCGCCACCGCCGAATGGATTGCAGAACGGCCCGGTGCCGACAACATACGCCGCGAGCTCGACGAGCTACTCGACGAAGGATGGGCGACGCATCCGATCAACAGGGTGAACGTGCACATAAAGCTCGAGTCACGACTGAAAGATAAGCCGCACAACGCGGCGGACATCGGCATGCCCGCTACCATTTCTGAACAGCGCGTGCGTCTGATCGTGTGGCAGCCTAAAGCGATGACTGCGCTGTTCGCTCCCATATTCCACGAAGCGAAGAAAAGACTCAAGGCATGCCTGAGGCGCGACGTGATTTACACGGACGGCATGAGCCCGCCCGAACTATCCGCCGTTTTGTCCACCTACGACGGATCAGGAGCTCTGTTCGTCGAGGACGATCTCGAAAAACAGGACCGTCAGACCGACATGACCCTGATCAAAACGGAAATGTTGATCTACAAGTGGTTGGGGGTCGACCCACGAGTTGTGGACATGTGGCAACGGGTGCACGAACACTGGTCCGCAAAAGGTTACTCGATCAGCTTCGACGGACACGCTTCGCGGCAGACTGGGCAAGCAACAACTTCCATCGGTAACACCATAGTCAACATGCTAGTACACATGCGCTTCGTCAAAACGCTTGGGCAAAACCTCGTCATCATGATGTGTCTCGGCGACGACAACCTGATGGTGTGCCGCGGGCACGTCACGGAGAACATGGTGTCCCAGAACAGCGCTCGGCACTTCAACATGAAGTCGAAACCGTCCGTGAGTAAGACGCACGGGGGTTTTCTGCGCATGATAGTGACCACCAGGTCCAACGGGACACTAATGTGCGGCCCGGATTTTATAAGATTACGGCGCAAATACGAGGTGACAAACGGAGTTTCCGAAGCCACCGTCGAAAACCTGCAAGCGCGGGGCGGCCAGCTACTGCGCCATGGTCGGCCCCGTTGGGCAATTCCCGAGTCTTTTCCCCCCTGGCGAATACGTCAGCCCGCCGTTGTGGTACGAACCACACAAGATCATAGCCATGACGGCAGAGAAATACGACACCACGCACGCCGCGGTCGAGGGAGAGATCGCCCGACTTTTCAACTACGTGCGAGACCCCGTCGTCAGGGAAGTCACAACAGAGATGTTTGTCGCCAGAGTGTAAAGAAATGCATGTCAGAGTGTAAAGAAATGAATGTTGTTGAAGTTGCCCCCAGAATGAGGTCATGGCCTTCAAGGAAGTCGGCAAGGTTGCCAAGCTCAAGCAGCTCCCCGTCGTCAGGGAAGTCACAACAGAGATGTTTGTCGCCAGAGTGTAAAGAAATGCATGTCAGAGTGTAA
>VVf-RdRp
CACGAGGGTGAATTCATTGCGAAGTTCCCTCTGATTCCCGGTCACGAGACCGTGGGCGTAATCGCCGCTGTAGGCCCTAAAGTCAAAGGCTTCAACATTGGCGACCGTGTGGCCGCTGATAACAGTGCTTCGCCGATCTCGGCCAGGATCACGGGCTCGATCGGGAGAACGAGAGGGCAATAAAAGAGGAGAGCAGGGCCGGGAGAGAGGACGTGAGAGGGGACGAAGGCCGGATATTACCACCACTTCAATCAAGCCATCTCGCCGACAACGCGAAGAGTCGTGGATCGAAATCCCCAAGAAGATTGTTAATCGGGCGGCGCTCCGGGCCCACGAGTATGACTTTGAAGAAACCGAGGCCTTCTTCTACGTCAAGGCTTACCTAGGACCGAATGAGGTGGCGGAGCTTTGGGCTGTCGCCTGGGATTATCGCCCATGGAGCTGAAGAGAAATACATGACTGCATCATCTGTTGCCGGCCAGTTGAGCGACTTCTGGTCGCGTAATGCGCCTGCTGCTGCAAGCGCTGCAAGTGCAAGTAATGTCGCCTCAGGCCAATCTGCGAGTGCCGCTACTACGGCTACTGCCGCCGCAGCTACTGCGGCTGCTGCTGCCACCGGCTCATCGCGTTGGGGTACTTGGGGCAAGCTTGCTATTGCAGCCGGCGGTGCCGCGGTAGTTGCAGCTGGTGCAGGGGCGGCTTGGTATAACCGCGACAACATCTCATCAGGCATCGGATGGGTCGGCGAGCATCCACAACTTCCCGCCGCCCTCGCCAACCCCGAAGACCGACCCAAGCCCAGAGCCGAAACGATACCCCGACAGAAGGAACAAGGAAAGCTTGGATCCGCCAACACGGACCGGTCCTTCCCCAACCGCGCCCCCCGACCACCCCCACGTGCCCTGCCAGGGTCTCGGAGTGCTAGAGCCGGAGGCTCGCCCTTTTACCGGGCTCTCACGGTAAACGGCCGATACCGGGACGAGTGTTTCCCCCACAAGAAGCACTCGGCCGCGCGTACCAAACCCCACCTTGCACTCGGGGCCCTCATCCGTAGCTGGGCCCACGTTCACGGGATGACAAAGGTCGAGGATGCGCTCGCCGCTGCTGCGGGCCGCCTCACGGCCGATCAAGCCACCGCGTACCTCATGTACGACACGGTGCTACGCCCCCACCTCGGTCCAACGGCTTGGCAGTACGCCCTGGCGTTGATCGTGGATCCTGCTAGGGCAAAGGGCCTGTCCGGCGCCCTGAAAGCCCTCGGATGGAACTGCACCGTCCTCGGCGCCGCATTCGTAGAAGCGAATGTTCTCGCCGGACGTGGTATAGGTGCAGTCGACTGGGAGAAGGAGATCTCCCGTCGGACGGATCAAGCTGCGGTGGACTCTGGCACAGTTCACCTCGACGAGGATCGCCTCCGGGGCCACGTTCGAGCCCTCTTCCGTGCCGAACTGCCTCGCGCCCCAGTCCTCCCCGACATGGATGACTGGTGGACGGCGAGGTGGGGCTGGTGTGTCAATGGCGCGCAGACCACGCGCTCTCTAGACTCAATGGGTGTGCCCCGCGACGCACTCAGTCAATTCAAACGGGTCTACCGTCGGATGGCCTCTGAGTGTCTCGACTCTTGCCCAGTGTACGGGTGGGACGGGACCACTAGTGTTTCAGCCTCCGAGAAGTTGGAACACGGGAAGACCCGGGCCATCTTCGCGTGCGACACGACCTCGTACTTCGCCTGGTCGTACCTGTTAAACCCCGTCGGTAAGTCATGGCAGAATAGCCGCGTCTTACTGGACCCGGGGAGAGGCGGGTCGATTTCGATCGCCCGCCGTATCCTGAAGGCACGGAGCTGCGGCTCGGTGAACCTGATGATGGATTTCGACGACTTCAACTCCCAGCACAGCACGGAGTCAATGAAGATCGTCACCGAGGAGCTTTGCTCCTACGTCAATGCCCCGCCCTGGCTGGCCGACGTCCTCCGGACTTCCCTCGATCGGGAATACATCCACCACGGAGGTCAGGCCCACCATGTCAAGGGCACCCTAATGAGTGGCCACCGCGGCACGACGTTCTTCAACTCCGTGTTGAATTACGCGTACATCCGGGAGGCGTACGGTCCTTCCGCGTTCGATGCTTGCTTCTCCTTACACACGGGGGACGACGTCTACATGCGCTTGCCGACCCTTGCGCACGCCGCCACTCTCCTCAGCTCAGCCTCCGCCCTAGGCTGTCGCCTTAACCCATCGAAGCAGTCGGTCGGTTTCCACAATGCTGAGTTCCTCCGTATGGGCATTTCTCCCGCCAGAGCCTGCGGCTACCCAGCCCGGAGCATCGCTACCCTTAGCTCCGGTTCATGGACGGTCGACGCCCCACCGACTCCACTCGAGGGCATCACGACAATCATGACCACCCTGAGGTCCCTCATCAACCGTACGGGGTCCGAGACAGTTGCAGCTGTCGCCGGACCTGCGGTTAAGTACCTCTCCAACACCTCAGCCGGACTTGCTACGAGTCTCTGCCGGGGTCAGGTCTCCCTGAACACCTTGCCTGTGTTCACCCAGCGGCACACAGTTCGCCGCATCAAGCTCCCGCCCGAAAGGCTGGATCCGATGCAGCTGACTGGGCTACCGCTACGGGCAACAACGGCCTACCTCACTAACCACGCCAGTGAGGTTGAGGTCGCCGGTTTAGAAATGACCGGGATGTCCCCCGCCTACGACATGGCCGCCTCGAGTTACCGAAAAGGGCTAGACCATGACGCCGGGATCCTCCCAGTCGCCCCTGCACTGGCAACCTCGGGTAACGTTACCCTACGAGGGATGGATGATGCTGCATCCCTCGTCACCCAGCCCCCGAAGGAAGGTGTACTGTCCCGGTACCCTTTACTACAGCTCATCAGACCGAGGTTGGGACGACAAGATCTTCTGGATCTCCTCGGTCTCTGTGGAGTGGCCCACTCTTCAAACCCGGAGCTCGACGCCTGGGGACCGGACTCACGGACAGTTATATCCGTGGAGTCCTACCCTTCGCCGACGCCCAATACCTATCCGCCCGGACCGACGCCGGGCACATCCTCAGCCGGACTCGCCACGAGTCTCTGCCGGGGTCAGGTCTCCCTGAACACCTTGCCTGTGTTCACCCAGCGGCACACAGTTCGCCGCATCAAACTCCCACCCGAGAGGTTGGATCCGATGCAGCTAACTGGGTTACCGCTACGGGCAACAACGGCCTACCTCACTAACCACGCCAGTGAGGTTGAGGTCGCCGGTTTAGAAATGACCGGGATGTCCCCCGCCTACGACATGGCCGCCTCGAGTTACCGAAAAGGGCTAGACCATGACGCCGGGATCCTCCCAGTCGCCCCTGCACTGGCAACCTCGGGTAACGTTACCCTACGAGGGATGGATGATGCTGCATCCCTCGTCACCCAGCCCCCGAAGGAAGGTGTACTGTCCCGGTACCCTTTACTACAGCTCATCAGACCGAGGTTGGGACGGCAAGATCTTCTGGATCTCCTTGGTCTCTGTGGAGTGGCCCACTCTTCAAACCCGGAGCTCGACGCCTGGGGACCGGACTCACGGACAGTTAATATCCGTGGAGTCCTACCCTTCGCCGACGCTCAATACCTATCCGCCCGGACTGACGCTGGGCACATCTACGTCACCTACCCCATAGGGATGTAAGTGTAGCCGGTAGGTTTGACAACCCCAGGACGTTCCTGGGGTTCTCCTTTTTCACCCCCGAAGGGGGGTGTTCTTTTAGGGCTCTTTTCGTACACTTGAGGCTTTTATATCTTCTCGCTGTATGGTTCTCTCTATACGCCTTTATTCATTTCTACTATATGTACTTCAGCAAGCGGTCCTCAAGCAAAGCGTGCTTTTGGTATAGACTATCTTGTGACTAGTGCTTTCTCTCAAATCTCCATACCGCTCCAACGTCAAGACCCGCTACATCGATCCCCTCCGGCCAACAGTCGTTCCTCGTCAGCAACGTCCGTGACG
>VVf-Cp
AATATGAACGACTCTAAGGTCTGGCTGATGTCTAATGACAACTTCCTTCAGGAGTCGACCGGGAGATTATTAACCGCTCCGTTCTCATCAAGAACATGCTAGAAGATATTGGCGACCTAGTTCTGTCAAAAGATAACCCTATTCCGAATAACAACCTCGACCACTCGAGGTTGCATATTCGGACGGGCGGGAGCAGGAGCTCCCGTAAATTCCGCTTGGGCCGTCCTTGTGGGGTACCCGGCTGCCAGGCCGGTCGTATCGTTGAGTCTCGCCCCCCGTGGCAGGGGGAAGTCCGCTGCGTCAACCATCGCTTGATTTCCGGGATTAGAGTTTCCTTGCTGGCCTCTCTGGAGGAGGGTTCCGTTGATACCAGACGCTAGCTAGTTTGCCTCAACTGATACTTTAGACACCCACCGACCACCCCAACTTTGCCTTTTTCCTGTCCCGCCTCCACCACCATGGACGGCGCTGTTTTTTCCGGCCTGTTGACAGGCCTCATCTCCTGCCCCCGCGGTGGGCTGCTCGACAGCAGCACCACCTACCGCCGCTATGCGGCCGCCCTGACGACGTCCACCGTCATCCGGGGCAACGTCGACTCCCGGTCGATACCCATCCAATACGAGGTGGGTAGACACACGGACCGGCTCGGCGCCCTTATGGCGCCCCCCCCCGATGGCGTCCCGTTCGTTAACGGGTCCTACTCGACCGCCGCCGTCCTGGCCCAGGATTTCCTGGGCTTGTCGAAGAAGTATTCCAACTTCTCGGCTACCTTTGCTTTCTCCTCGCTCGCGGGCTTGGTCGAGCGCATTGCCAAGGGCCTCGCGGCCAGCTCGTTGTACCCCGACGTGACGTCGGACAGTCTTCGGGGCGGCCGCTCCCTCGTCATCAATGCCCTCGGCACCTACGACGAGCCCGTCAACAGCCTTGTTGACACCGTGTTCATCCCGCGGGTGGTGAACTCGACCGCCACCGGCGACGTCTTCACCATCCTGGTGAGTGCGGCCGCCGGTGAAGGCGCTCGGGTCGCCACCGATACTCTGGAGTTGGACGGCGCCACTCGCCGTCCCATCATCAACACCGTCGGCGCGTCTGTTTTTCCCTCCGCTTGCGTCGCCGCCCTGCGAGTCCTGGGGACCAATATGGTCGCCAGTGACCAGGGCCCTCTCTTCGCCTTGGCCGTGACCAGGGGCCTCCACCAGGCCCTGACGGTTGTCGGCCACACCGACGAGGGTGGCATCATGCGCGACTTGCTGCGCTGTGCCGCCTTCTCGCCGCCCTTCGGCGGCATCCACACGGGCTTGACCCCGTACACCGGCATCCCTGCCCTGAGCAGTGATGCTACAGTCGACCGTGCCGCCTACGTCGACAGCCTCGCCCTCGCCACCGCCGCCCTCGTCGCTCACTGCGATCCGGGAGACGTCCACGCGGGGACCTGGTTCCCCCAGTTTTTCTCCGCCGCGGGTGGGGACGATCAGGAGCCGGGGGCTAACTGTCCCCCGACTCCTGAGATGTCCGCCGCTAATCGGACGCAGCTCTTGGCCAACCAGGGCCCATTCTGGGAGCAGTACGTCGCCGGTCTCGCTCGCCTCTTCGCTGCTGAGGGGCACAACGACACCGCCGTCCGCGCCGCCACCGCGGCCTCTTACGCCCTTTGCCCCGACCCCCGCCACCTCAGGTACCAGTCGGTCACCCCCTGGTTCTGGGTCGAGCCGACCGGCATCCTCCCGCCCTCCCTCCTCGGTTCAGCCGCTGAGGCGAACTCCTCCGGTTCCTTCGTGCGCCGGTGCGAGCGGACCGAGGTTCGCGCCTTCCCGGACGCGTACCTACAGGGAGCGGGTGACACTACCGTGTCAGCTTTGGTTTGCTCCGCCCCGTCCGCCCGCCGCCTAGGCGTGCTGCTGCACTTCCAGCAGCACCCCTGTGCTGGGTTGGGCAGCCTTGTGCCCCGCCAGCTGGACCCTTCGGGGATCATCCAGCCTGGTGGCCACGATGGCCACGAGCTGGTCAGGGACCGCCTCGTTGCCGGGCTCCCTCTGCCAGATTACCTCTGGCAGCGAGGCCAGTCGCCGCTCCCCGCCCCCGGGGAGTTCTTGAACCTCCGCGGTTCGGTGGGCTTTCGGGTCCGCCACCAGTCATGGGACGACGAGGGCTACGTCACGCCCGAGCACATCTACCCGATGCGCGAGATAGTCGACGCCACCGTCGTCTTGGAGTGCTCCACCCTCCGGGGCATGGCAACCGGCCCCTCCAACAAGGGGACGGCTGCGGTCCGCCGCGCTCGGTCCGGGGCCGCGAGGGAACTCGCCGCCTCGCGGCGCCGGCTGGGCCAGTACGGCCGGGCTGACGTCGCCGAGATGGCCCTCTCCTTCTCTGCCCCCTCCCTCCGCCCGGGCTCTGTCCCCCGCGACGACTCTCTGCCGGGCCCAACCCCCGATCCCACGCGCCGGGTCCTCGCCAAACCGGCGGGCACCTACGCAGAGGTGGTTTCCGGCC
