# Supplementary material for: Uncovering a Complex Virome Associated with the Cacao Pathogens Ceratocystis cacaofunesta and Ceratocystis fimbriata
Source: Pathogens. 2023 Feb 9;12(2):287. doi: 10.3390/pathogens12020287 (PMC9967352; doi:10.3390/pathogens12020287)
Supplement: Supplementary file 1 [file pathogens-12-00287-s001.zip › tableS1_ libraries_information.xlsx]

## Sheet: Table S1
Bioproject	Organism	Run	Total Sequences	Bowtie2 - Aligned 0 times	Bowtie2 - Aligned exactly 1 time	Bowtie2 - Aligned >1 times	SPAdes	rnaviralSPAdes	Trinity	CAP3
PRJNA415812	Ceratocystis cacaofunesta	SRR6217952	55951393	3.549.075 (6.39%)	50.613.134 (91.15%)	1.366.876 (2.46%)	1750	965	480	1002
PRJNA67151	Ceratocystis fimbriata CBS 114723	SRR8599076	42480313	9.524.414 (23.58%)	27.690.238 (68.55%)	3.178.582 (7.87%)	7.398	10.709	64961	52493
