# Supplementary material for: Uncovering a Complex Virome Associated with the Cacao Pathogens Ceratocystis cacaofunesta and Ceratocystis fimbriata
Source: Pathogens. 2023 Feb 9;12(2):287. doi: 10.3390/pathogens12020287 (PMC9967352; doi:10.3390/pathogens12020287)
Supplement: Supplementary file 1 [file pathogens-12-00287-s001.zip › tableS2_blastn_blastx.xlsx]

## Sheet: S2_blastn_blastx
Contig	Length	BlastN (blastn)					BlastX
		Query Cover	E value	Per. Ident	Hit	Accession	Query Cover	E value	Per. Ident	Hit	Accession
Cc_Contig1	9920	-	-	-	No significant similarity found	-	0.94	0.0	42.58%	unknown [Mycosphaerella hypovirus A]	QED42897.1
Cc_Contig2	5652	0.3	3e-148	67.83%	Fusarium graminearum negative-stranded RNA virus 1 strain HN1, complete genome	MF276904.1	0.98	0.0	55.14%	RNA-dependent RNA polymerase [Alternaria tenuissima negative-stranded RNA virus 1]	QDB75013.1
Cc_Contig3	1998	0.98	0.0	78.19%	Cherry chlorotic rusty spot associated partitivirus RdRp gene for RNA-dependent RNA polymerase, segment 1, genomic RNA	AJ781401.1	0.93	0.0	83.55%	RNA-dependent RNA polymerase [Amasya cherry disease-associated mycovirus]	YP_138537.1
Cc_Contig4	1818	0.46	3e-79	71.69%	Amasya cherry disease associated partitivirus CP gene for putative coat protein, genomic RNA	AJ781167.1	0.8	0.0	58.61%	putative coat protein [Amasya cherry disease-associated mycovirus]	YP_138536.1
Cc_Contig5	2409	-	-	-	No significant similarity found	MN605460.1	0.91	0.0	50.00%	RNA-dependent RNA polymerase [Botrytis cinerea binarnavirus 5]	QJT73728.1
Cf_Contig6	2395	-	-	-	No significant similarity found	LN827943.1	0.53	4e-113	48.97%	putative RNA-dependent RNA polymerase [Cryphonectria parasitica mitovirus 1-NB631]	NP_660174.1
Cf_Contig7	3268	0.77	0.0	69.50%	Thielaviopsis basicola mitovirus RNA-dependent RNA polymerase gene, complete cds	AY563138.1	0.64	0.0	66.00%	RNA-dependent RNA polymerase [Thielaviopsis basicola mitovirus]	AAZ99833.1
Cf_Contig8	10431	-	-	-	No significant similarity found	-	0.38	2e-55	23.85%	putative polyprotein [Tvarminne alphaendornavirus]	UYL94275.1
Cf_Contig10	5328	-	-	-	No significant similarity found	-	0.51	4e-40	23.25%	polyprotein [Alphaendornavirus sp.]	UIA10510.1
Cf_Contig8	5790	-	-	-	No significant similarity found	-	0.53	1e-125	0.5071	polyprotein [Morchella importuna endornavirus 2]	AZT88617.1
Cf_Contig11	3995	0.19	3e-38	65.59%	Totiviridae sp. isolate 237-k141_22307 genomic sequence	MZ218601.1	0.66	0.0	48.79%	putative RNA-dependent RNA polymerase [Totiviridae sp.]	UHS72462.1
Cf_Contig12	2493	0.41	2e-69	0.6645	Fusarium asiaticum victorivirus 1 isolate F16176, complete genome	NC_040653.1	0.77	0.0	54.05%	coat protein [Colletotrichum eremochloae totivirus 1]	AZT88632.1
