# Supplementary material for: Uncovering a Complex Virome Associated with the Cacao Pathogens Ceratocystis cacaofunesta and Ceratocystis fimbriata
Source: Pathogens. 2023 Feb 9;12(2):287. doi: 10.3390/pathogens12020287 (PMC9967352; doi:10.3390/pathogens12020287)
Supplement: Supplementary file 1 [file pathogens-12-00287-s001.zip › tableS3_ phylogenetic_trees-updated.xlsx]

## Sheet: TableS3
Hypoviridae			Mymonaviridae			Partitiviridae			Narnaviridae and Mitoviridae			Endornaviridae			Totiviridae
Organism	Accession number		Organism	Accession number		Organism	Accession number		Organism	Accession number		Organism	Accession number		Organism	Accession number
Wuhan insect virus 14	YP_009342443.1		Soybean leaf-associated negative-stranded RNA virus 1	ALM62220.1		Podosphaera tridactyla virus 1	UXX51154.1		Fusarium mangiferae mitovirus 4	UBZ25883.1		Ceratobasidium endornavirus A	YP_009310113.1		Fusarium asiaticum victorivirus 2	UBS89881.1
Fusarium sacchari hypovirus 1	QIQ28422.1		Fusarium graminearum negative-stranded RNA virus 1	UNG44335.1		Podosphaera prunicola partitivirus 3	ATS94413.1		Fusarium globosum mitovirus 1	YP_009126872.1		Alphaendornavirus sp.	UIA10509.1		Fusarium sambucinum victorivirus 1	UBR58457.1
Apis hypovirus 2	UCR92524.1		Fusarium asiaticum negative-stranded RNA virus 1	UNG44331.1		Rhizoctonia oryzae-sativae partitivirus 3	BCY26956.1		Fusarium circinatum mitovirus 1	AHI43533.1		Rhizoctonia solani endornavirus 7	QDW65434.1		Alternaria dianthicola victorivirus 1	UYZ32455.1
Nigrospora oryzae hypovirus 1	BCY26969.1		Fusarium proliferatum mymonavirus 1	UWK02084.1		Rhizoctonia fumigata partitivirus	AJE25830.1		Mitoviridae sp.	URG16629.1		Ceratobasidium endornavirus 2	QNN89174.1		Totiviridae sp.	UHS72462.1
Fusarium graminearum hypovirus 1	AZT88611.1		Plasmopara viticola lesion associated mononega virus 2	QHD64785.1		Gaeumannomyces tritici partitivirus 2	AZT88604.1		Fusarium coeruleum mitovirus 1	YP_009126873.1		Rhizoctonia solani endornavirus 4	QDW65431.1		Magnaporthe oryzae virus 1	YP_122352.1
Trichoderma asperellum hypovirus 1	AZT88614.1		Alternaria tenuissima negative-stranded RNA virus 1	QDB75013.1		Vicia cryptic viru	ABN71237.1		Fusarium poae mitovirus 2	YP_009272899.1		Gyromitra esculenta endornavirus 1	AZT88615.1		Botrytis cinerea victorivirus 2-BCS8	QLC37104.1
Botrytis cinerea hypovirus 2	QJT73706.1		Alternaria dianthicola negative-stranded RNA virus 1	UYZ32462.1		Tulasnella partitivirus 3	BDB07479.1		Thielaviopsis basicola mitovirus	AAZ99833.1		Morchella importuna endornavirus 2	AZT88617.1		Chalara elegans RNA Virus 1	YP_024728.1
Macrophomina phaseolina hypovirus 2	QOE55583.1		Botrytis cinerea negative-stranded RNA virus 3	QJT73696.1		Diuris pendunculata cryptic virus	AFQ95555.1		Leptosphaeria biglobosa mitovirus 1	YP_009553599.1		Rhizoctonia solani endornavirus 2	YP_010086587.1		Rosellinia necatrix victorivirus 1	YP_008130308.1
Trichoderma harzianum hypovirus 2	UDP60414.1		Cryphonectria parasitica sclerotimonavirus 1	QMP84020.1		Cherry chloroticrusty spot associated partitivirus	CAH03668.1		Ophiostoma mitovirus 4	NP_660179.1		Rhizoctonia solani endornavirus 6	QDW65433.1		Botryosphaeria dothidea victorivirus 1	YP_009072433.1
Bipolaris oryzae hypovirus 1	QDY81493.1		Sclerotinia sclerotiorum negative-stranded RNA virus 3-A	AWY11025.1		Amasya cherry disease-associated mycovirus	YP_138537.1		Monilinia fructicola mitovirus 4	UTQ48821.1		Erysiphe cichoracearum alphaendornavirus	ALX17418.1		Beauveria bassiana victorivirus 1	YP_009508251.1
Fusarium graminearum hypovirus 2	YP_009130646.1		Botrytis cinerea negative-stranded RNA virus 4	QJT73698.1		Alphapartitivirus sp.	UDL14427.1		Rugonectria rugulosa mitovirus 1	UTS95837.1		Grapevine endophyte alphaendornavirus	AFV91541.1		Ustilaginoidea virens RNA virus 1	AGO04407.1
Fusarium poae hypovirus 1	BAV56305.1		Plasmopara viticola lesion associated mymonavirus 1	QHD64779.1		Rosellinia necatrix partitivirus 9	BBB86797.1		Ophiostoma mitovirus 7	AGT55877.1		Helicobasidium mompa alphaendornavirus 1	BAE94538.1		Aspergillus foetidus slow virus 1	YP_009508249.1
Rosellinia necatrix hypovirus 1	BBC21049.1		Plasmopara viticola lesion associated mononegaambi virus 6	QHD64777.1		Heterobasidion partitivirus 5	ADV15444.1		Cryphonectria cubensis mitovirus 2b	AAR01974.1		Neofusicoccum parvum endornavirus 1	QTE76046.1		Botryosphaeria dothidea victorivirus 2-like	UVZ34687.1
Agaricus bisporus virus 2	AQM49947.1		Plasmopara viticola lesion associated mononegaambi virus 8	QHD64783.1		Rhizoctonia oryzae-sativae partitivirus 2	BCY26954.1		Cryphonectria parasitica mitovirus 1-NB631	NP_660174.1		Helianthus annuus alphaendornavirus	UMQ74215.1		Epichloe festucae virus 1	YP_009508253.1
Sclerotium rolfsii hypovirus 8	AZF86113.1		Fusarium oxysporum mymonavirus 1	UNQ75001.1		Ceratobasidium partitivirus	AOX47570.1		Fusarium sambucinum mitovirus 2	BCP96873.1		Agaricus bisporus endornavirus 1	AQM32768.1		Coniothyrium minitans RNA virus	YP_392467.1
Sclerotium rolfsii hypovirus 1	AZA15168.1		Lentinula edodes negative-strand RNA virus 1	BBI93117.1		Rhizoctonia solani partitivirus virus 3	ASZ83552.1		Botryosphaeria dothidea mitovirus 1	QMU24933.1		Hot pepper alphaendornavirus	ALD49085.1		Gremmeniella abietina RNA virus L1	AAK11656.1
Rhizoctonia solani hypovirus 1	QDW92698.1		Auricularia heimuer negative-stranded RNA virus 1	QJP04103.1		Rhizoctonia solani dsRNA virus 4	YP_009551520.1		Setosphaeria turcica mitovirus 1	AZT88625.1		Bell pepper alphaendornavirus	YP_009513187.1		Leishmania RNA virus 1 1	NP_041191.1
Mycosphaerella hypovirus A	QED42897.1		Botrytis cinerea negative-stranded RNA virus 7	QKW91270.1		Rhizoctonia oryzae-sativae partitivirus 4	BCY26958.1		Neofusicoccum parvum mitovirus 3	QTE76052.1		Phaseolus vulgaris alphaendornavirus 2	ALJ56098.1		Trichomonas vaginalis virus 1	AAA62868.1
Hypovirus sp.	USC30043.1		Apple virus B	QIC52850.1		Rhizoctonia solani dsRNA virus 2	UIW13805.1		Plasmopara viticola lesion associated mitovirus 43	QIR30266.1		Winged bean alphaendornavirus 1	BAV69339.1		Saccharomyces cerevisiae virus L-BC La	NP_042581.1
Sclerotium rolfsii hypovirus 4	AZF86109.1		Gysing virus	QGA70913.1		Erysiphe necator associated betapartitivirus 1	QKK35382.1		Botrytis cinerea mitovirus 9	QKW91256.1		Triticeae associated alphaendornavirus	QPF20438.1		Giardia lamblia virus	AAB01579.1
Beihai hypo-like virus 1	YP_009333297.1		Orinoco virus	ANQ45640.1		Betapartitivirus sp	UEP18204.1		Grapevine associated narnavirus-1	CEZ26304.1		Hordeum vulgare alphaendornavirus	ALT66307.1		Pseudomonas phage phiYY	YP_009618381.1
Beihai sipunculid worm virus 6	YP_009333562.1		Formica exsecta virus 4	AWI42881.1		Spinach deltapartitivirus 1	ARO72610.1		Erysiphe necator associated mitovirus 31	QKI79979.1		Cluster bean endornavirus 1	AYA60157.1		Pseudomonas phage phi13	NP_690817.1
Sclerotinia sclerotiorum hypovirus 6	AZF86111.1		Beihai rhabdo-like virus 4	YP_009333418.1		Medicago sativa deltapartitivirus 1	ATJ00052.1		Monilinia fructicola mitovirus 1	UTQ48818.1		Phytophthora alphaendornavirus 1	CAI47561.1
Fusarium oxysporum dianthi hypovirus 2	QHI00074.1		Nyavirus midwayense	ACQ94979.1		Erysiphe necator associated gammapartitivirus 1	QKK35392.1		Geopora sumneriana mitovirus 1	QDM55307.1		Rhizoctonia cerealis alphaendornavirus 1	YP_008719905.1
Botrytis cinerea hypovirus 1	UNI72644.1		Beihai rhabdo-like virus 6	YP_009333413.1		Gammapartitivirus sp	UDL14336.1		Rhizoctonia solani mitovirus 39	QIS79099.1		Lagenaria siceraria endornavirus-California	AHK22715.1
Rosellinia necatrix fusarivirus 1	BAP16392.1		Wenzhou tapeworm virus 1	APG78764.1		Cryptosporidium parvum virus 1	ARS33771.1		Sanya narna-like virus 3	UUW20998.1		Cucumis melo alphaendornavirus	ALV83885.1
Fusarium poae fusarivirus 1	BAV56303.1		Socyvirus heteroderae	YP_009052467.1		Saccharomyces cerevisiae cryspovirus 1	UGZ04791.1		Guiyang narna-like virus 3	UUW20994.1		Yerba mate alphaendornavirus	AID67139.1
Botrytis cinerea fusarivirus 7	QJT73723.1					Coccinia mottle virus	YP_009272707.1		Botryosphaeria dothidea narnavirus 1	QED22729.1		Persea americana alphaendornavirus 1	AEX28369.1
Lentinula edodes fusarivirus 1	QOX06044.1					Caladenia virus A	YP_006666511.1		Sclerotinia sclerotiorum narnavirus 2	QZE12026.1		Oryza sativa alphaendornavirus	BAA06862.1
						Brome streak mosaic virus	UZN89630.1		Botrytis cinerea binarnavirus 5	QJT73728.1		Phaseolus vulgaris alphaendornavirus 1	ALJ56097.1
						Passiflora edulis symptomless virus	UIX56007.1		Leptosphaeria biglobosa narnavirus 3	UYL94518.1		Brown algae endornavirus 1	BBZ90073.1
						Agropyron mosaic virus	AUF81943.1		Cladosporium tenuissimum narnavirus 1	QDB74996.1		Tvarminne alphaendornavirus	UYL94275.1
						African eggplant mosaic virus	YP_009666833.1		Erysiphe necator associated narnavirus 24	QJT93756.1		Sclerotinia sclerotiorum betaendornavirus 1	AHN50398.1
						Blackberry virus Y	YP_851006.1		Bremia lactucae associated narnavirus 3	QIP68021.1		Botrytis cinerea betaendornavirus 1	AOZ66245.1
						Alpinia oxyphylla mosaic virus	YP_010086847.1		Plasmopara viticola lesion associated narnavirus 2	UUW20990.1		Gremmeniella abietina endornavirus 1	ABD73305.1
						Bellflower veinal mottle virus	YP_009508455.1		Rhizoctonia solani narnavirus 4	UIW13846.1		Sclerotinia minor betaendornavirus1	AXX39023.1
						Barley mild mosaic virus	AAC42215.1		Epirus cherry virus	YP_002019754.1		Tuber aestivum betaendornavirus	ADU64759.1
						Areca palm necrotic ringspot virus	UIW31246.1		Ourmia melon virus	YP_002019757.1		Alternaria brassicicola betaendornavirus 1	AJA41110.1
						Celery latent virus	YP_010087166.1		Cassava virus C	YP_003104770.1		Rosellinia necatrix betaendornavirus1	BAT32944.1
									Hubei narna-like virus 3	YP_009337787.1		Citrus sudden death-associated virus	YP_224218.1
									Beihai narna-like virus 9	YP_009333316.1		Maize rayado fino virus	NP_115454.2
									ssRNA phage Esthiorhiza.2_44	DAD51276.1		Grapevine fleck virus	NP_542612.1
									ssRNA phage Esthiorhiza.4_3	DAD50247.1		Andean potato latent virus	AAC25015.1
									ssRNA phage Gerhypos.3_3	DAD50287.1		Anagyris vein yellowing virus	YP_002308578.1
									ssRNA phage Gerhypos.4_17	DAD51589.1
									ssRNA phage Esthiorhiza.1_9	DAD52218.1
