# Supplementary material for: Uncovering a Complex Virome Associated with the Cacao Pathogens Ceratocystis cacaofunesta and Ceratocystis fimbriata
Source: Pathogens. 2023 Feb 9;12(2):287. doi: 10.3390/pathogens12020287 (PMC9967352; doi:10.3390/pathogens12020287)
Supplement: Supplementary file 1 [file pathogens-12-00287-s001.zip › tableS4_kaiju.xlsx]

## Sheet: C. cacaofunesta
674	root	cellular organisms	Eukaryota	Opisthokonta	Fungi	Dikarya	Basidiomycota	Agaricomycotina	Agaricomycetes	Agaricomycetidae	Agaricales	Marasmiaceae	Moniliophthora	Moniliophthora roreri
486	root	cellular organisms	Eukaryota	Opisthokonta	Fungi	Dikarya	Basidiomycota	Agaricomycotina	Agaricomycetes	Agaricomycetidae	Agaricales	Marasmiaceae	Moniliophthora	Moniliophthora perniciosa	Moniliophthora perniciosa FA553
135	root	cellular organisms	Eukaryota	Opisthokonta	Fungi	Dikarya	Basidiomycota	Agaricomycotina	Agaricomycetes	Agaricomycetidae	Agaricales	Marasmiaceae	Moniliophthora	Moniliophthora roreri	Moniliophthora roreri MCA 2997
75	root	cellular organisms	Eukaryota	Opisthokonta	Fungi	Dikarya	Ascomycota	saccharomyceta	Pezizomycotina	leotiomyceta	sordariomyceta	Sordariomycetes	Hypocreomycetidae	Microascales	Ceratocystidaceae	Ceratocystis
46	root	cellular organisms	Eukaryota	Opisthokonta	Fungi	Dikarya	Basidiomycota	Agaricomycotina	Agaricomycetes
28	root	cellular organisms	Eukaryota	Opisthokonta	Fungi	Dikarya	Basidiomycota	Agaricomycotina	Agaricomycetes	Agaricomycetidae	Agaricales	Marasmiaceae	Marasmius	Marasmius fiardii	Marasmius fiardii PR-910
27	root	cellular organisms	Eukaryota	Opisthokonta	Fungi	Dikarya	Basidiomycota	Agaricomycotina	Agaricomycetes	Agaricomycetidae	Agaricales	Marasmiaceae	Moniliophthora
25	root	cellular organisms	Eukaryota	Opisthokonta	Fungi	Dikarya	Basidiomycota	Agaricomycotina	Agaricomycetes	Agaricomycetidae	Agaricales
19	root	cellular organisms	Eukaryota	Opisthokonta	Fungi	Dikarya	Basidiomycota	Agaricomycotina	Agaricomycetes	Agaricomycetidae	Agaricales	Marasmiaceae	Moniliophthora	Moniliophthora perniciosa
18	root	cellular organisms	Eukaryota	Opisthokonta	Fungi	Dikarya	Ascomycota	saccharomyceta	Pezizomycotina	leotiomyceta	sordariomyceta	Sordariomycetes	Hypocreomycetidae	Microascales	Ceratocystidaceae	Ceratocystis	Ceratocystis fimbriata	Ceratocystis fimbriata CBS 114723
13	root	cellular organisms	Eukaryota	Opisthokonta	Fungi	Dikarya	Basidiomycota	Agaricomycotina	Agaricomycetes	Agaricomycetidae	Agaricales	Marasmiaceae
11	root	cellular organisms	Eukaryota	Opisthokonta	Fungi	Dikarya	Basidiomycota	Agaricomycotina	Agaricomycetes	Agaricomycetidae
11	root	cellular organisms	Eukaryota	Opisthokonta	Fungi	Dikarya	Ascomycota	saccharomyceta	Pezizomycotina	leotiomyceta	sordariomyceta	Sordariomycetes	Hypocreomycetidae	Microascales	Ceratocystidaceae	Ceratocystis	Ceratocystis platani
10	root	cellular organisms	Eukaryota	Opisthokonta	Fungi
9	root	cellular organisms	Eukaryota
8	root	cellular organisms	Eukaryota	Opisthokonta	Fungi	Dikarya	Basidiomycota	Agaricomycotina	Agaricomycetes	Agaricomycetidae	Agaricales	Marasmiaceae	Tetrapyrgos	Tetrapyrgos nigripes
8	root	cellular organisms	Eukaryota	Opisthokonta	Fungi	Dikarya	Basidiomycota	Agaricomycotina	Agaricomycetes	Agaricomycetes incertae sedis	Polyporales	Gelatoporiaceae	Gelatoporia	Gelatoporia subvermispora	Gelatoporia subvermispora B
7	root	cellular organisms	Eukaryota	Opisthokonta	Fungi	Fungi incertae sedis	Mucoromycota	Mucoromycotina	Mucoromycetes	Mucorales	Mucorineae	Mucoraceae	Mucor	Mucor ambiguus
7	root	cellular organisms	Eukaryota	Opisthokonta	Fungi	Dikarya	Basidiomycota	Agaricomycotina	Agaricomycetes	Agaricomycetidae	Agaricales	Physalacriaceae	Armillaria
7	root	cellular organisms	Eukaryota	Opisthokonta	Fungi	Dikarya	Basidiomycota	Agaricomycotina	Agaricomycetes	Agaricomycetidae	Agaricales	Agaricaceae	Leucoagaricus	Leucoagaricus leucothites
7	root	cellular organisms	Eukaryota	Opisthokonta	Fungi	Dikarya	Ascomycota	saccharomyceta	Pezizomycotina	leotiomyceta	sordariomyceta	Sordariomycetes	Hypocreomycetidae	Microascales	Ceratocystidaceae
7	root	cellular organisms	Eukaryota	Opisthokonta	Fungi	Dikarya
6	root	cellular organisms	Eukaryota	Opisthokonta	Fungi	Dikarya	Basidiomycota	Agaricomycotina	Agaricomycetes	Agaricomycetidae	Agaricales	Omphalotaceae	Gymnopus	Gymnopus luxurians	Gymnopus luxurians FD-317 M1
6	root	cellular organisms	Eukaryota	Opisthokonta	Fungi	Dikarya	Basidiomycota
6	root	Viruses	Riboviria	Orthornavirae	Pisuviricota	Duplopiviricetes	Durnavirales	Hypoviridae	unclassified Hypoviridae	Mycosphaerella hypovirus A
5	root	cellular organisms	Eukaryota	Opisthokonta	Fungi	Dikarya	Basidiomycota	Agaricomycotina	Agaricomycetes	Agaricomycetidae	Jaapiales	Jaapiaceae	Jaapia	Jaapia argillacea	Jaapia argillacea MUCL 33604
5	root	cellular organisms	Eukaryota	Opisthokonta	Fungi	Dikarya	Basidiomycota	Agaricomycotina	Agaricomycetes	Agaricomycetidae	Agaricales	Strophariaceae	Psilocybe	Psilocybe cf. subviscida
5	root	cellular organisms	Eukaryota	Opisthokonta	Fungi	Dikarya	Basidiomycota	Agaricomycotina	Agaricomycetes	Agaricomycetidae	Agaricales	Psathyrellaceae	Coprinopsis	Coprinopsis cinerea
5	root	cellular organisms	Eukaryota	Opisthokonta	Fungi	Dikarya	Ascomycota	saccharomyceta	Pezizomycotina	leotiomyceta	sordariomyceta	Sordariomycetes
5	root	Viruses	Riboviria	Orthornavirae	Pisuviricota	Duplopiviricetes	Durnavirales	Partitiviridae	Alphapartitivirus	Cherry chlorotic rusty spot associated partitivirus	Amasya cherry disease-associated mycovirus
5	root	Viruses	Riboviria	unclassified Riboviria	unclassified ssRNA viruses	unclassified ssRNA negative-strand viruses	Alternaria tenuissima negative-stranded RNA virus 1
4	root	cellular organisms	Bacteria	Terrabacteria group	Actinobacteria	Actinomycetia	Corynebacteriales	Mycobacteriaceae	Mycobacteroides	Mycobacteroides abscessus	Mycobacteroides abscessus subsp. abscessus
4	root	cellular organisms	Eukaryota	Opisthokonta	Fungi	Dikarya	Basidiomycota	Agaricomycotina	Agaricomycetes	Agaricomycetidae	Agaricales	Physalacriaceae	Mucidula	Mucidula mucida
4	root	cellular organisms	Eukaryota	Opisthokonta	Fungi	Dikarya	Basidiomycota	Agaricomycotina	Agaricomycetes	Agaricomycetidae	Agaricales	Omphalotaceae	Gymnopus	Gymnopus confluens
4	root	cellular organisms	Eukaryota	Opisthokonta	Fungi	Dikarya	Basidiomycota	Agaricomycotina	Agaricomycetes	Agaricomycetidae	Agaricales	Omphalotaceae	Gymnopus
4	root	cellular organisms	Eukaryota	Opisthokonta	Fungi	Dikarya	Basidiomycota	Agaricomycotina	Agaricomycetes	Agaricomycetes incertae sedis	Polyporales	Fomitopsidaceae	Fomitopsis	Fomitopsis rosea
4	root	cellular organisms	Eukaryota	Opisthokonta	Fungi	Dikarya	Basidiomycota	Agaricomycotina	Agaricomycetes	Agaricomycetes incertae sedis	Cantharellales	Ceratobasidiaceae	Rhizoctonia	Rhizoctonia solani
4	root	cellular organisms	Eukaryota	Opisthokonta	Fungi	Dikarya	Ascomycota	saccharomyceta	Pezizomycotina	leotiomyceta	dothideomyceta	Dothideomycetes	Pleosporomycetidae	Pleosporales	Pleosporineae	Pleosporaceae	Alternaria	Alternaria sect. Alternaria	Alternaria alternata complex
4	root	Viruses	Riboviria	Orthornavirae	Pisuviricota	Duplopiviricetes	Durnavirales	Partitiviridae	Alphapartitivirus	Cherry chlorotic rusty spot associated partitivirus
3	root	cellular organisms	Bacteria	Terrabacteria group	Actinobacteria	Actinomycetia	Propionibacteriales	Propionibacteriaceae	Cutibacterium	Cutibacterium acnes
3	root	cellular organisms	Bacteria	Terrabacteria group	Firmicutes	Bacilli	Bacillales	Paenibacillaceae	Paenibacillus
3	root	cellular organisms	Eukaryota	Opisthokonta	Fungi	Dikarya	Basidiomycota	Agaricomycotina	Agaricomycetes	Agaricomycetidae	Boletales	Coniophorineae	Serpulaceae	Serpula	Serpula lacrymans	Serpula lacrymans var. lacrymans
3	root	cellular organisms	Eukaryota	Opisthokonta	Fungi	Dikarya	Basidiomycota	Agaricomycotina	Agaricomycetes	Agaricomycetidae	Agaricales	Strophariaceae	Galerina	Galerina marginata	Galerina marginata CBS 339.88
3	root	cellular organisms	Eukaryota	Opisthokonta	Fungi	Dikarya	Basidiomycota	Agaricomycotina	Agaricomycetes	Agaricomycetidae	Agaricales	Psathyrellaceae	Psathyrella	Psathyrella aberdarensis
3	root	cellular organisms	Eukaryota	Opisthokonta	Fungi	Dikarya	Basidiomycota	Agaricomycotina	Agaricomycetes	Agaricomycetidae	Agaricales	Pleurotaceae	Pleurotus	Pleurotus ostreatus	Pleurotus ostreatus PC15
3	root	cellular organisms	Eukaryota	Opisthokonta	Fungi	Dikarya	Basidiomycota	Agaricomycotina	Agaricomycetes	Agaricomycetidae	Agaricales	Physalacriaceae	Armillaria	Armillaria gallica
3	root	cellular organisms	Eukaryota	Opisthokonta	Fungi	Dikarya	Basidiomycota	Agaricomycotina	Agaricomycetes	Agaricomycetidae	Agaricales	Omphalotaceae	Rhodocollybia	Rhodocollybia butyracea
3	root	cellular organisms	Eukaryota	Opisthokonta	Fungi	Dikarya	Basidiomycota	Agaricomycotina	Agaricomycetes	Agaricomycetidae	Agaricales	Omphalotaceae	Gymnopus	Gymnopus androsaceus	Gymnopus androsaceus JB14
3	root	cellular organisms	Eukaryota	Opisthokonta	Fungi	Dikarya	Basidiomycota	Agaricomycotina	Agaricomycetes	Agaricomycetidae	Agaricales	Amanitaceae	Amanita	Amanita rubescens
3	root	cellular organisms	Eukaryota	Opisthokonta	Fungi	Dikarya	Basidiomycota	Agaricomycotina	Agaricomycetes	Agaricomycetidae	Agaricales	Agaricaceae	Agaricus	Agaricus bisporus	Agaricus bisporus var. bisporus	Agaricus bisporus var. bisporus H97
3	root	cellular organisms	Eukaryota	Opisthokonta	Fungi	Dikarya	Basidiomycota	Agaricomycotina	Agaricomycetes	Agaricomycetes incertae sedis	Polyporales	Laetiporaceae	Laetiporus	Laetiporus sulphureus	Laetiporus sulphureus 93-53
3	root	cellular organisms	Eukaryota	Opisthokonta	Fungi	Dikarya	Basidiomycota	Agaricomycotina	Agaricomycetes	Agaricomycetes incertae sedis	Polyporales	Grifolaceae	Grifola	Grifola frondosa
3	root	cellular organisms	Eukaryota	Opisthokonta	Fungi	Dikarya	Ascomycota	saccharomyceta	Pezizomycotina	leotiomyceta	sordariomyceta	Sordariomycetes	Hypocreomycetidae	Hypocreales	Ophiocordycipitaceae	Tolypocladium	Tolypocladium paradoxum
3	root	cellular organisms	Eukaryota	Opisthokonta	Fungi	Dikarya	Ascomycota	saccharomyceta	Pezizomycotina	leotiomyceta	dothideomyceta	Dothideomycetes	Pleosporomycetidae	Venturiales	Venturiaceae	Venturia	Venturia inaequalis
3	root	cellular organisms	Eukaryota	Opisthokonta	Fungi	Dikarya	Ascomycota	saccharomyceta	Pezizomycotina	leotiomyceta
3	root	Viruses	Riboviria	Orthornavirae	Negarnaviricota	Haploviricotina	Monjiviricetes	Mononegavirales	Mymonaviridae	Sclerotimonavirus	unclassified Sclerotimonavirus	Cryphonectria parasitica sclerotimonavirus 1
2	root	cellular organisms	Bacteria	Terrabacteria group	Actinobacteria	Actinomycetia	Propionibacteriales	Propionibacteriaceae	Propionibacterium	Propionibacterium freudenreichii
2	root	cellular organisms	Bacteria	Terrabacteria group	Actinobacteria	Actinomycetia	Micrococcales	Promicromonosporaceae	Isoptericola	Isoptericola cucumis
2	root	cellular organisms	Bacteria	Terrabacteria group	Actinobacteria	Actinomycetia
2	root	cellular organisms	Bacteria	Terrabacteria group	Firmicutes	Bacilli	Bacillales	Paenibacillaceae	Paenibacillus	unclassified Paenibacillus	Paenibacillus sp. P22
2	root	cellular organisms	Bacteria	Terrabacteria group	Firmicutes	Bacilli	Bacillales	Paenibacillaceae	Paenibacillus	unclassified Paenibacillus	Paenibacillus sp. GM1FR
2	root	cellular organisms	Eukaryota	Opisthokonta	Fungi	Fungi incertae sedis	Mucoromycota	Glomeromycotina	Glomeromycetes	Diversisporales	Diversisporaceae	Diversispora	Diversispora epigaea
2	root	cellular organisms	Eukaryota	Opisthokonta	Fungi	Dikarya	Basidiomycota	Ustilaginomycotina	Exobasidiomycetes	Microstromatales	Microstromatales incertae sedis	Pseudomicrostroma	Pseudomicrostroma glucosiphilum
2	root	cellular organisms	Eukaryota	Opisthokonta	Fungi	Dikarya	Basidiomycota	Agaricomycotina	Tremellomycetes	Tremellales	Trimorphomycetaceae	Saitozyma	unclassified Saitozyma	Saitozyma sp. JCM 24511
2	root	cellular organisms	Eukaryota	Opisthokonta	Fungi	Dikarya	Basidiomycota	Agaricomycotina	Dacrymycetes	Dacrymycetales	Dacrymycetaceae	Dacryopinax	Dacryopinax primogenitus
2	root	cellular organisms	Eukaryota	Opisthokonta	Fungi	Dikarya	Basidiomycota	Agaricomycotina	Agaricomycetes	Agaricomycetidae	Boletales	Suillineae	Rhizopogonaceae	Rhizopogon	Rhizopogon vesiculosus
2	root	cellular organisms	Eukaryota	Opisthokonta	Fungi	Dikarya	Basidiomycota	Agaricomycotina	Agaricomycetes	Agaricomycetidae	Boletales	Sclerodermatineae	Sclerodermataceae	Scleroderma	Scleroderma citrinum	Scleroderma citrinum Foug A
2	root	cellular organisms	Eukaryota	Opisthokonta	Fungi	Dikarya	Basidiomycota	Agaricomycotina	Agaricomycetes	Agaricomycetidae	Boletales	Paxilineae	Gyrodontaceae	Gyrodon	Gyrodon lividus
2	root	cellular organisms	Eukaryota	Opisthokonta	Fungi	Dikarya	Basidiomycota	Agaricomycotina	Agaricomycetes	Agaricomycetidae	Boletales	Melanogastraceae	Melanogaster	Melanogaster broomeianus
2	root	cellular organisms	Eukaryota	Opisthokonta	Fungi	Dikarya	Basidiomycota	Agaricomycotina	Agaricomycetes	Agaricomycetidae	Boletales
2	root	cellular organisms	Eukaryota	Opisthokonta	Fungi	Dikarya	Basidiomycota	Agaricomycotina	Agaricomycetes	Agaricomycetidae	Amylocorticiales	Amylocorticiaceae	Plicaturopsis	Plicaturopsis crispa	Plicaturopsis crispa FD-325 SS-3
2	root	cellular organisms	Eukaryota	Opisthokonta	Fungi	Dikarya	Basidiomycota	Agaricomycotina	Agaricomycetes	Agaricomycetidae	Agaricales	Strophariaceae	Psilocybe	Psilocybe cyanescens
2	root	cellular organisms	Eukaryota	Opisthokonta	Fungi	Dikarya	Basidiomycota	Agaricomycotina	Agaricomycetes	Agaricomycetidae	Agaricales	Psathyrellaceae	Coprinopsis	Coprinopsis marcescibilis
2	root	cellular organisms	Eukaryota	Opisthokonta	Fungi	Dikarya	Basidiomycota	Agaricomycotina	Agaricomycetes	Agaricomycetidae	Agaricales	Pluteaceae	Volvariella	Volvariella volvacea	Volvariella volvacea WC 439
2	root	cellular organisms	Eukaryota	Opisthokonta	Fungi	Dikarya	Basidiomycota	Agaricomycotina	Agaricomycetes	Agaricomycetidae	Agaricales	Pluteaceae	Pluteus	Pluteus cervinus
2	root	cellular organisms	Eukaryota	Opisthokonta	Fungi	Dikarya	Basidiomycota	Agaricomycotina	Agaricomycetes	Agaricomycetidae	Agaricales	Pleurotaceae	Pleurotus	Pleurotus ostreatoroseus
2	root	cellular organisms	Eukaryota	Opisthokonta	Fungi	Dikarya	Basidiomycota	Agaricomycotina	Agaricomycetes	Agaricomycetidae	Agaricales	Mycenaceae	Mycena	Mycena sanguinolenta
2	root	cellular organisms	Eukaryota	Opisthokonta	Fungi	Dikarya	Basidiomycota	Agaricomycotina	Agaricomycetes	Agaricomycetidae	Agaricales	Mycenaceae	Mycena	Mycena kentingensis
2	root	cellular organisms	Eukaryota	Opisthokonta	Fungi	Dikarya	Basidiomycota	Agaricomycotina	Agaricomycetes	Agaricomycetidae	Agaricales	Cortinariaceae	Gymnopilus	Gymnopilus junonius
2	root	cellular organisms	Eukaryota	Opisthokonta	Fungi	Dikarya	Basidiomycota	Agaricomycotina	Agaricomycetes	Agaricomycetidae	Agaricales	Bolbitiaceae	Panaeolus	Panaeolus cyanescens
2	root	cellular organisms	Eukaryota	Opisthokonta	Fungi	Dikarya	Basidiomycota	Agaricomycotina	Agaricomycetes	Agaricomycetidae	Agaricales	Bolbitiaceae	Agrocybe	Agrocybe pediades
2	root	cellular organisms	Eukaryota	Opisthokonta	Fungi	Dikarya	Basidiomycota	Agaricomycotina	Agaricomycetes	Agaricomycetidae	Agaricales	Amanitaceae	Amanita	Amanita polypyramis	Amanita polypyramis BW_CC
2	root	cellular organisms	Eukaryota	Opisthokonta	Fungi	Dikarya	Basidiomycota	Agaricomycotina	Agaricomycetes	Agaricomycetes incertae sedis	Polyporales	Phanerochaetaceae	Phanerochaete	Phanerochaete carnosa	Phanerochaete carnosa HHB-10118-sp
2	root	cellular organisms	Eukaryota	Opisthokonta	Fungi	Dikarya	Basidiomycota	Agaricomycotina	Agaricomycetes	Agaricomycetes incertae sedis	Hymenochaetales	Schizoporaceae	Schizopora	Schizopora paradoxa
2	root	cellular organisms	Eukaryota	Opisthokonta	Fungi	Dikarya	Basidiomycota	Agaricomycotina	Agaricomycetes	Agaricomycetes incertae sedis	Hymenochaetales	Hymenochaetaceae	Fomitiporia	Fomitiporia mediterranea	Fomitiporia mediterranea MF3/22
2	root	cellular organisms	Eukaryota	Opisthokonta	Fungi	Dikarya	Basidiomycota	Agaricomycotina	Agaricomycetes	Agaricomycetes incertae sedis	Gloeophyllales
2	root	cellular organisms	Eukaryota	Opisthokonta	Fungi	Dikarya	Basidiomycota	Agaricomycotina	Agaricomycetes	Agaricomycetes incertae sedis	Corticiales	Punctulariaceae	Punctularia	Punctularia strigosozonata	Punctularia strigosozonata HHB-11173 SS5
2	root	cellular organisms	Eukaryota	Opisthokonta	Fungi	Dikarya	Basidiomycota	Agaricomycotina	Agaricomycetes	Agaricomycetes incertae sedis	Cantharellales	Ceratobasidiaceae	Rhizoctonia	Rhizoctonia solani	Rhizoctonia solani AG-8	Rhizoctonia solani AG-8 WAC10335
2	root	cellular organisms	Eukaryota	Opisthokonta	Fungi	Dikarya	Basidiomycota	Agaricomycotina	Agaricomycetes	Agaricomycetes incertae sedis	Cantharellales	Ceratobasidiaceae	Ceratobasidium	unclassified Ceratobasidium	Ceratobasidium sp. AG-I
2	root	cellular organisms	Eukaryota	Opisthokonta	Fungi	Dikarya	Ascomycota	saccharomyceta	Pezizomycotina	leotiomyceta	sordariomyceta	Sordariomycetes	Hypocreomycetidae	Glomerellales	Glomerellaceae	Colletotrichum	Colletotrichum spaethianum species complex
2	root	Viruses	Riboviria
2	root	cellular organisms
1	root	cellular organisms	Bacteria	Terrabacteria group	Actinobacteria	Actinomycetia	Streptosporangiales	Streptosporangiaceae	Sphaerisporangium	Sphaerisporangium siamense
1	root	cellular organisms	Bacteria	Terrabacteria group	Actinobacteria	Actinomycetia	Propionibacteriales	Propionibacteriaceae	Cutibacterium	Cutibacterium acnes	Cutibacterium acnes HL074PA1
1	root	cellular organisms	Bacteria	Terrabacteria group	Actinobacteria	Actinomycetia	Propionibacteriales	Propionibacteriaceae	Cutibacterium	Cutibacterium acnes	Cutibacterium acnes HL053PA2
1	root	cellular organisms	Bacteria	Terrabacteria group	Actinobacteria	Actinomycetia	Propionibacteriales	Propionibacteriaceae	Cutibacterium	Cutibacterium acnes	Cutibacterium acnes HL042PA3
1	root	cellular organisms	Bacteria	Terrabacteria group	Actinobacteria	Actinomycetia	Corynebacteriales	Corynebacteriaceae	Corynebacterium	Corynebacterium efficiens	Corynebacterium efficiens YS-314
1	root	cellular organisms	Bacteria	Terrabacteria group	Actinobacteria	Actinomycetia	Actinomycetales	Actinomycetaceae	Actinomyces	environmental samples	uncultured Actinomyces sp.
1	root	cellular organisms	Bacteria	Terrabacteria group	Cyanobacteria/Melainabacteria group	Cyanobacteria	Oscillatoriophycideae	Oscillatoriales	Coleofasciculaceae	Geitlerinema	unclassified Geitlerinema	Geitlerinema sp. FC II
1	root	cellular organisms	Bacteria	Terrabacteria group	Firmicutes	Bacilli	Lactobacillales	Streptococcaceae	Streptococcus	Streptococcus pneumoniae
1	root	cellular organisms	Bacteria	Terrabacteria group	Firmicutes	Bacilli	Bacillales	Paenibacillaceae	Paenibacillus	unclassified Paenibacillus	Paenibacillus sp. P1XP2
1	root	cellular organisms	Bacteria	Terrabacteria group	Firmicutes	Bacilli	Bacillales	Paenibacillaceae	Paenibacillus	unclassified Paenibacillus
1	root	cellular organisms	Bacteria	Proteobacteria	Gammaproteobacteria	Pasteurellales	Pasteurellaceae	Actinobacillus	Actinobacillus pleuropneumoniae
1	root	cellular organisms	Eukaryota	Opisthokonta	Fungi	Dikarya	Basidiomycota	Pucciniomycotina	Pucciniomycetes	Pucciniales	Pucciniaceae	Puccinia	Puccinia coronata	Puccinia coronata var. avenae	Puccinia coronata f. sp. avenae
1	root	cellular organisms	Eukaryota	Opisthokonta	Fungi	Dikarya	Basidiomycota	Pucciniomycotina
1	root	cellular organisms	Eukaryota	Opisthokonta	Fungi	Dikarya	Basidiomycota	Agaricomycotina	Agaricomycetes	Agaricomycetidae	Boletales	Paxilineae	Paxillaceae	Hydnomerulius	Hydnomerulius pinastri	Hydnomerulius pinastri MD-312
1	root	cellular organisms	Eukaryota	Opisthokonta	Fungi	Dikarya	Basidiomycota	Agaricomycotina	Agaricomycetes	Agaricomycetidae	Agaricales	Tricholomataceae	Tricholoma	Tricholoma matsutake	Tricholoma matsutake 945
1	root	cellular organisms	Eukaryota	Opisthokonta	Fungi	Dikarya	Basidiomycota	Agaricomycotina	Agaricomycetes	Agaricomycetidae	Agaricales	Strophariaceae	Hypholoma	Hypholoma sublateritium	Hypholoma sublateritium FD-334 SS-4
1	root	cellular organisms	Eukaryota	Opisthokonta	Fungi	Dikarya	Basidiomycota	Agaricomycotina	Agaricomycetes	Agaricomycetidae	Agaricales	Omphalotaceae
1	root	cellular organisms	Eukaryota	Opisthokonta	Fungi	Dikarya	Basidiomycota	Agaricomycotina	Agaricomycetes	Agaricomycetidae	Agaricales	Lyophyllaceae	Termitomyces	unclassified Termitomyces	Termitomyces sp. J132
1	root	cellular organisms	Eukaryota	Opisthokonta	Fungi	Dikarya	Basidiomycota	Agaricomycotina	Agaricomycetes	Agaricomycetidae	Agaricales	Lyophyllaceae	Hypsizygus	Hypsizygus marmoreus
1	root	cellular organisms	Eukaryota	Opisthokonta	Fungi	Dikarya	Basidiomycota	Agaricomycotina	Agaricomycetes	Agaricomycetes incertae sedis	Polyporales	Polyporaceae	Dichomitus	Dichomitus squalens	Dichomitus squalens LYAD-421 SS1
1	root	cellular organisms	Eukaryota	Opisthokonta	Fungi	Dikarya	Basidiomycota	Agaricomycotina	Agaricomycetes	Agaricomycetes incertae sedis	Polyporales	Meruliaceae	Phlebia	Phlebia radiata
1	root	cellular organisms	Eukaryota	Opisthokonta	Fungi	Dikarya	Basidiomycota	Agaricomycotina	Agaricomycetes	Agaricomycetes incertae sedis	Cantharellales	Botryobasidiaceae	Botryobasidium	Botryobasidium botryosum	Botryobasidium botryosum FD-172 SS1
1	root	cellular organisms	Eukaryota	Opisthokonta	Fungi	Dikarya	Ascomycota	saccharomyceta	Pezizomycotina	leotiomyceta	sordariomyceta	Sordariomycetes	Hypocreomycetidae	Hypocreales	Ophiocordycipitaceae	Ophiocordyceps	Ophiocordyceps sinensis
1	root	cellular organisms	Eukaryota	Opisthokonta	Fungi	Dikarya	Ascomycota	saccharomyceta	Pezizomycotina	leotiomyceta	sordariomyceta	Sordariomycetes	Hypocreomycetidae	Hypocreales	Hypocreaceae	Trichoderma	Trichoderma atroviride	Trichoderma atroviride IMI 206040
1	root	cellular organisms	Eukaryota	Opisthokonta	Fungi	Dikarya	Ascomycota	saccharomyceta	Pezizomycotina	leotiomyceta	sordariomyceta	Sordariomycetes	Hypocreomycetidae
1	root	cellular organisms	Eukaryota	Opisthokonta	Fungi	Dikarya	Ascomycota	saccharomyceta	Pezizomycotina	leotiomyceta	sordariomyceta	Leotiomycetes
1	root	cellular organisms	Eukaryota	Opisthokonta	Fungi	Dikarya	Ascomycota	saccharomyceta	Pezizomycotina	leotiomyceta	dothideomyceta	Dothideomycetes	Pleosporomycetidae	Pleosporales	Massarineae	Didymosphaeriaceae	Didymosphaeria	Didymosphaeria enalia
1	root	cellular organisms	Eukaryota	Opisthokonta	Fungi	Dikarya	Ascomycota	saccharomyceta	Pezizomycotina	leotiomyceta	dothideomyceta	Dothideomycetes	Pleosporomycetidae	Pleosporales	Massarineae	Didymosphaeriaceae	Bimuria	Bimuria novae-zelandiae	Bimuria novae-zelandiae CBS 107.79
1	root	cellular organisms	Eukaryota	Opisthokonta	Fungi	Dikarya	Ascomycota	Taphrinomycotina	Taphrinomycotina incertae sedis	Saitoella	Saitoella complicata	Saitoella complicata NRRL Y-17804
1	root	Viruses	Riboviria	Orthornavirae	Negarnaviricota	Haploviricotina	Monjiviricetes	Mononegavirales	unclassified Mononegavirales	Plasmopara viticola lesion associated mononega virus 2
1	root	Viruses	Riboviria	Orthornavirae	Pisuviricota	Duplopiviricetes	Durnavirales	Partitiviridae	unclassified Partitiviridae	Ceratobasidium partitivirus
462	Unclassified

## Sheet: C. fimbriata
11619	root	cellular organisms	Eukaryota	Opisthokonta	Fungi	Dikarya	Ascomycota	saccharomyceta	Pezizomycotina	leotiomyceta	sordariomyceta	Sordariomycetes	Hypocreomycetidae	Microascales	Ceratocystidaceae	Ceratocystis
10854	root	cellular organisms	Eukaryota	Opisthokonta	Fungi	Dikarya	Ascomycota	saccharomyceta	Pezizomycotina	leotiomyceta	sordariomyceta	Sordariomycetes	Hypocreomycetidae	Microascales	Ceratocystidaceae	Ceratocystis	Ceratocystis fimbriata	Ceratocystis fimbriata CBS 114723
942	root	cellular organisms	Eukaryota	Opisthokonta	Fungi	Dikarya	Ascomycota	saccharomyceta	Pezizomycotina	leotiomyceta	sordariomyceta	Sordariomycetes	Hypocreomycetidae	Microascales	Ceratocystidaceae	Ceratocystis	Ceratocystis platani
248	root	cellular organisms	Eukaryota	Opisthokonta	Fungi	Dikarya	Ascomycota	saccharomyceta	Pezizomycotina	leotiomyceta	sordariomyceta	Sordariomycetes	Hypocreomycetidae	Microascales	Ceratocystidaceae
131	root	cellular organisms	Eukaryota	Opisthokonta	Fungi	Dikarya	Ascomycota	saccharomyceta	Pezizomycotina	leotiomyceta	sordariomyceta	Sordariomycetes
100	root	cellular organisms	Eukaryota	Opisthokonta	Fungi	Dikarya	Ascomycota	saccharomyceta	Pezizomycotina	leotiomyceta
79	root	cellular organisms	Eukaryota	Opisthokonta	Fungi	Dikarya	Ascomycota	saccharomyceta	Pezizomycotina	leotiomyceta	sordariomyceta	Sordariomycetes	Hypocreomycetidae
54	root	cellular organisms	Eukaryota	Opisthokonta	Fungi
37	root	cellular organisms	Eukaryota	Opisthokonta	Fungi	Dikarya	Ascomycota	saccharomyceta	Pezizomycotina	leotiomyceta	sordariomyceta	Sordariomycetes	Hypocreomycetidae	Microascales	Ceratocystidaceae	Thielaviopsis	Thielaviopsis punctulata
36	root	cellular organisms	Eukaryota	Opisthokonta	Fungi	Dikarya	Ascomycota	saccharomyceta	Pezizomycotina	leotiomyceta	sordariomyceta	Sordariomycetes	Hypocreomycetidae	Microascales	Ceratocystidaceae	Ceratocystis	Ceratocystis fimbriata
24	root	cellular organisms	Eukaryota	Opisthokonta	Fungi	Dikarya	Ascomycota	saccharomyceta	Pezizomycotina	leotiomyceta	sordariomyceta
22	root	cellular organisms	Eukaryota	Opisthokonta	Fungi	Dikarya
21	root	cellular organisms	Eukaryota	Opisthokonta	Fungi	Dikarya	Ascomycota	saccharomyceta	Pezizomycotina
14	root	cellular organisms	Eukaryota	Opisthokonta	Fungi	Dikarya	Ascomycota	saccharomyceta	Pezizomycotina	leotiomyceta	sordariomyceta	Sordariomycetes	Hypocreomycetidae	Hypocreales	Nectriaceae	Fusarium	Fusarium oxysporum species complex	Fusarium oxysporum
14	root	cellular organisms	Eukaryota
13	root	cellular organisms
12	root	cellular organisms	Eukaryota	Opisthokonta	Fungi	Dikarya	Ascomycota	saccharomyceta	Pezizomycotina	leotiomyceta	sordariomyceta	Sordariomycetes	Sordariomycetidae	Diaporthales	Cryphonectriaceae	Cryphonectria-Endothia species complex	Cryphonectria	Cryphonectria parasitica	Cryphonectria parasitica EP155
12	root	cellular organisms	Eukaryota	Opisthokonta	Fungi	Dikarya	Ascomycota	saccharomyceta	Pezizomycotina	leotiomyceta	sordariomyceta	Sordariomycetes	Hypocreomycetidae	Microascales
12	root	cellular organisms	Eukaryota	Opisthokonta	Fungi	Dikarya	Ascomycota	saccharomyceta
11	root	cellular organisms	Eukaryota	Opisthokonta	Fungi	Dikarya	Ascomycota	saccharomyceta	Pezizomycotina	leotiomyceta	sordariomyceta	Sordariomycetes	Hypocreomycetidae	Hypocreales	Ophiocordycipitaceae	Ophiocordyceps	Ophiocordyceps unilateralis
9	root	cellular organisms	Eukaryota	Opisthokonta	Fungi	Dikarya	Ascomycota	saccharomyceta	Pezizomycotina	leotiomyceta	sordariomyceta	Sordariomycetes	Hypocreomycetidae	Hypocreales	Clavicipitaceae	Ustilaginoidea	Ustilaginoidea virens
8	root	cellular organisms	Eukaryota	Opisthokonta	Fungi	Dikarya	Ascomycota	saccharomyceta	Pezizomycotina	leotiomyceta	sordariomyceta	Sordariomycetes	Hypocreomycetidae	Hypocreales
8	root	cellular organisms	Bacteria	Terrabacteria group	Firmicutes	Clostridia	Clostridiales	Peptostreptococcaceae	Clostridioides	Clostridioides difficile
7	root	cellular organisms	Eukaryota	Opisthokonta	Fungi	Dikarya	Ascomycota	saccharomyceta	Pezizomycotina	leotiomyceta	sordariomyceta	Sordariomycetes	Sordariomycetidae	Sordariales	Chaetomiaceae	Chaetomium	Chaetomium globosum	Chaetomium globosum CBS 148.51
7	root	cellular organisms	Eukaryota	Opisthokonta	Fungi	Dikarya	Ascomycota	saccharomyceta	Pezizomycotina	leotiomyceta	sordariomyceta	Sordariomycetes	Hypocreomycetidae	Hypocreales	Nectriaceae	Fusarium
7	root	Viruses	Riboviria	Orthornavirae	Duplornaviricota	Chrymotiviricetes	Ghabrivirales	Totiviridae	unclassified Totiviridae	Umbelopsis ramanniana virus 2
6	root	cellular organisms	Eukaryota	Opisthokonta	Fungi	Dikarya	Ascomycota	saccharomyceta	Saccharomycotina	Saccharomycetes	Saccharomycetales	Trigonopsidaceae	Tortispora	Tortispora caseinolytica	Tortispora caseinolytica NRRL Y-17796
6	root	cellular organisms	Eukaryota	Opisthokonta	Fungi	Dikarya	Ascomycota	saccharomyceta	Pezizomycotina	leotiomyceta	sordariomyceta	Sordariomycetes	Hypocreomycetidae	Hypocreales	Hypocreaceae	Trichoderma	Trichoderma atroviride	Trichoderma atroviride IMI 206040
6	root	cellular organisms	Eukaryota	Opisthokonta	Fungi	Dikarya	Ascomycota	saccharomyceta	Pezizomycotina	leotiomyceta	Eurotiomycetes	Eurotiomycetidae	Onygenales	Ajellomycetaceae	Blastomyces	Blastomyces dermatitidis
5	root	cellular organisms	Eukaryota	Opisthokonta	Fungi	Dikarya	Ascomycota	saccharomyceta	Pezizomycotina	leotiomyceta	sordariomyceta	Sordariomycetes	Sordariomycetidae	Sordariales	Chaetomiaceae	Thermothelomyces	Thermothelomyces thermophilus	Thermothelomyces thermophilus ATCC 42464
5	root	cellular organisms	Eukaryota	Opisthokonta	Fungi	Dikarya	Ascomycota	saccharomyceta	Pezizomycotina	leotiomyceta	sordariomyceta	Sordariomycetes	Hypocreomycetidae	Glomerellales	Glomerellaceae	Colletotrichum	Colletotrichum graminicola species complex	Colletotrichum graminicola	Colletotrichum graminicola M1.001
5	root	cellular organisms	Eukaryota	Opisthokonta	Fungi	Dikarya	Ascomycota	saccharomyceta	Pezizomycotina	leotiomyceta	dothideomyceta	Dothideomycetes
5	root	cellular organisms	Bacteria	Proteobacteria	Gammaproteobacteria	Enterobacterales	Enterobacteriaceae	Escherichia	Escherichia coli	Escherichia coli APEC O1
5	root	cellular organisms	Bacteria	Proteobacteria	Gammaproteobacteria	Enterobacterales	Enterobacteriaceae	Escherichia	Escherichia coli
5	root	cellular organisms	Eukaryota	Sar	Alveolata	Ciliophora	Intramacronucleata	Spirotrichea	Stichotrichia	Sporadotrichida	Oxytrichidae	Stylonychinae	Stylonychia	Stylonychia lemnae
4	root	cellular organisms	Eukaryota	Opisthokonta	Fungi	Dikarya	Ascomycota	saccharomyceta	Pezizomycotina	leotiomyceta	sordariomyceta	Sordariomycetes	Hypocreomycetidae	Hypocreales	Nectriaceae	Fusarium	Fusarium fujikuroi species complex	Fusarium subglutinans
4	root	cellular organisms	Eukaryota	Opisthokonta	Fungi	Dikarya	Ascomycota	saccharomyceta	Pezizomycotina	leotiomyceta	sordariomyceta	Sordariomycetes	Hypocreomycetidae	Hypocreales	Hypocreaceae	Trichoderma	Trichoderma harzianum
4	root	cellular organisms	Eukaryota	Opisthokonta	Fungi	Dikarya	Ascomycota	saccharomyceta	Pezizomycotina	leotiomyceta	sordariomyceta	Sordariomycetes	Hypocreomycetidae	Glomerellales	Glomerellaceae	Colletotrichum
4	root	cellular organisms	Eukaryota	Opisthokonta	Fungi	Dikarya	Ascomycota	saccharomyceta	Pezizomycotina	leotiomyceta	Eurotiomycetes	Eurotiomycetidae	Eurotiales	Aspergillaceae	Penicillium	Penicillium freii
4	root	cellular organisms	Eukaryota	Opisthokonta	Fungi	Dikarya	Ascomycota	saccharomyceta	Pezizomycotina	leotiomyceta	Eurotiomycetes	Eurotiomycetidae	Eurotiales	Aspergillaceae	Aspergillus
3	root	cellular organisms	Eukaryota	Opisthokonta	Fungi	Fungi incertae sedis	Mucoromycota	Glomeromycotina	Glomeromycetes	Diversisporales	Diversisporaceae	Diversispora	Diversispora epigaea
3	root	cellular organisms	Eukaryota	Opisthokonta	Fungi	Dikarya	Basidiomycota	Agaricomycotina	Agaricomycetes	Agaricomycetes incertae sedis	Russulales	Bondarzewiaceae	Heterobasidion	Heterobasidion annosum species complex	Heterobasidion irregulare	Heterobasidion irregulare TC 32-1
3	root	cellular organisms	Eukaryota	Opisthokonta	Fungi	Dikarya	Ascomycota	saccharomyceta	Pezizomycotina	leotiomyceta	sordariomyceta	Sordariomycetes	Xylariomycetidae	Xylariales	Xylariaceae	Xylaria	Xylaria flabelliformis
3	root	cellular organisms	Eukaryota	Opisthokonta	Fungi	Dikarya	Ascomycota	saccharomyceta	Pezizomycotina	leotiomyceta	sordariomyceta	Sordariomycetes	Sordariomycetidae	Sordariales	Chaetomiaceae	Chaetomium	Chaetomium thermophilum	Chaetomium thermophilum var. thermophilum	Chaetomium thermophilum var. thermophilum DSM 1495
3	root	cellular organisms	Eukaryota	Opisthokonta	Fungi	Dikarya	Ascomycota	saccharomyceta	Pezizomycotina	leotiomyceta	sordariomyceta	Sordariomycetes	Hypocreomycetidae	Hypocreales	Nectriaceae	Fusarium	Fusarium solani species complex	Fusarium solani
3	root	cellular organisms	Eukaryota	Opisthokonta	Fungi	Dikarya	Ascomycota	saccharomyceta	Pezizomycotina	leotiomyceta	sordariomyceta	Sordariomycetes	Hypocreomycetidae	Hypocreales	Nectriaceae	Fusarium	Fusarium oxysporum species complex	Fusarium oxysporum	Fusarium oxysporum f. sp. cubense	Fusarium oxysporum f. sp. cubense race 1
3	root	cellular organisms	Eukaryota	Opisthokonta	Fungi	Dikarya	Ascomycota	saccharomyceta	Pezizomycotina	leotiomyceta	sordariomyceta	Sordariomycetes	Hypocreomycetidae	Hypocreales	Clavicipitaceae	Claviceps	Claviceps purpurea	Claviceps purpurea 20.1
3	root	cellular organisms	Eukaryota	Opisthokonta	Fungi	Dikarya	Ascomycota	saccharomyceta	Pezizomycotina	leotiomyceta	dothideomyceta	Dothideomycetes	Pleosporomycetidae	Pleosporales	Pleosporineae	Pleosporaceae	Alternaria	Alternaria sect. Alternaria	Alternaria alternata complex
3	root	cellular organisms	Eukaryota	Opisthokonta	Fungi	Dikarya	Ascomycota	saccharomyceta	Pezizomycotina	leotiomyceta	dothideomyceta	Dothideomycetes	Dothideomycetes incertae sedis	Trypetheliales	Trypetheliaceae	Viridothelium	Viridothelium virens
3	root	cellular organisms	Eukaryota	Opisthokonta	Fungi	Dikarya	Ascomycota	saccharomyceta	Pezizomycotina	leotiomyceta	Eurotiomycetes	Eurotiomycetidae	Eurotiales	Aspergillaceae	Aspergillus	Aspergillus novofumigatus	Aspergillus novofumigatus IBT 16806
3	root	cellular organisms	Eukaryota	Opisthokonta	Fungi	Dikarya	Ascomycota	saccharomyceta	Pezizomycotina	leotiomyceta	Eurotiomycetes	Eurotiomycetidae	Eurotiales	Aspergillaceae	Aspergillus	Aspergillus heteromorphus	Aspergillus heteromorphus CBS 117.55
3	root	Viruses	Riboviria	Orthornavirae	Lenarviricota	Howeltoviricetes	Cryppavirales	Mitoviridae	Mitovirus	unclassified Mitovirus	Thielaviopsis basicola mitovirus
3	root	Viruses	Riboviria	Orthornavirae	Duplornaviricota	Chrymotiviricetes	Ghabrivirales	Totiviridae	unclassified Totiviridae	Colletotrichum navitas totivirus 1
2	root	cellular organisms	Eukaryota	Opisthokonta	Fungi	Dikarya	Basidiomycota	Pucciniomycotina	Pucciniomycetes	Pucciniales	Melampsoraceae	Melampsora	Melampsora larici-populina	Melampsora larici-populina 98AG31
2	root	cellular organisms	Eukaryota	Opisthokonta	Fungi	Dikarya	Ascomycota	saccharomyceta	Pezizomycotina	leotiomyceta	sordariomyceta	Sordariomycetes	Xylariomycetidae	Xylariales	Microdochiaceae	Microdochium	Microdochium bolleyi
2	root	cellular organisms	Eukaryota	Opisthokonta	Fungi	Dikarya	Ascomycota	saccharomyceta	Pezizomycotina	leotiomyceta	sordariomyceta	Sordariomycetes	Xylariomycetidae	Xylariales	Hypoxylaceae	Hypoxylon	unclassified Hypoxylon	Hypoxylon sp. EC38
2	root	cellular organisms	Eukaryota	Opisthokonta	Fungi	Dikarya	Ascomycota	saccharomyceta	Pezizomycotina	leotiomyceta	sordariomyceta	Sordariomycetes	Sordariomycetidae	Ophiostomatales	Ophiostomataceae	Grosmannia	Grosmannia clavigera	Grosmannia clavigera kw1407
2	root	cellular organisms	Eukaryota	Opisthokonta	Fungi	Dikarya	Ascomycota	saccharomyceta	Pezizomycotina	leotiomyceta	sordariomyceta	Sordariomycetes	Sordariomycetidae	Diaporthales	Valsaceae	Valsa	Valsa sordida
2	root	cellular organisms	Eukaryota	Opisthokonta	Fungi	Dikarya	Ascomycota	saccharomyceta	Pezizomycotina	leotiomyceta	sordariomyceta	Sordariomycetes	Hypocreomycetidae	Microascales	Microascaceae	Lomentospora	Lomentospora prolificans
2	root	cellular organisms	Eukaryota	Opisthokonta	Fungi	Dikarya	Ascomycota	saccharomyceta	Pezizomycotina	leotiomyceta	sordariomyceta	Sordariomycetes	Hypocreomycetidae	Hypocreales	Nectriaceae	Fusarium	Fusarium decemcellulare species complex	Fusarium decemcellulare
2	root	cellular organisms	Eukaryota	Opisthokonta	Fungi	Dikarya	Ascomycota	saccharomyceta	Pezizomycotina	leotiomyceta	sordariomyceta	Sordariomycetes	Hypocreomycetidae	Hypocreales	Nectriaceae	Fusarium	Fusarium decemcellulare species complex	Fusarium albosuccineum
2	root	cellular organisms	Eukaryota	Opisthokonta	Fungi	Dikarya	Ascomycota	saccharomyceta	Pezizomycotina	leotiomyceta	sordariomyceta	Sordariomycetes	Hypocreomycetidae	Hypocreales	Clavicipitaceae	Epichloe	Epichloe festucae	Epichloe festucae Fl1
2	root	cellular organisms	Eukaryota	Opisthokonta	Fungi	Dikarya	Ascomycota	saccharomyceta	Pezizomycotina	leotiomyceta	sordariomyceta	Sordariomycetes	Hypocreomycetidae	Glomerellales	Plectosphaerellaceae	Verticillium	Verticillium dahliae
2	root	cellular organisms	Eukaryota	Opisthokonta	Fungi	Dikarya	Ascomycota	saccharomyceta	Pezizomycotina	leotiomyceta	sordariomyceta	Sordariomycetes	Hypocreomycetidae	Glomerellales	Glomerellaceae	Colletotrichum	Colletotrichum boninense species complex	Colletotrichum karsti
2	root	cellular organisms	Eukaryota	Opisthokonta	Fungi	Dikarya	Ascomycota	saccharomyceta	Pezizomycotina	leotiomyceta	sordariomyceta	Sordariomycetes	Hypocreomycetidae	Glomerellales
2	root	cellular organisms	Eukaryota	Opisthokonta	Fungi	Dikarya	Ascomycota	saccharomyceta	Pezizomycotina	leotiomyceta	sordariomyceta	Leotiomycetes	Helotiales	Sclerotiniaceae	Sclerotium	Sclerotium cepivorum
2	root	cellular organisms	Eukaryota	Opisthokonta	Fungi	Dikarya	Ascomycota	saccharomyceta	Pezizomycotina	leotiomyceta	sordariomyceta	Leotiomycetes	Helotiales	Sclerotiniaceae
2	root	cellular organisms	Eukaryota	Opisthokonta	Fungi	Dikarya	Ascomycota	saccharomyceta	Pezizomycotina	leotiomyceta	sordariomyceta	Leotiomycetes	Helotiales	Rutstroemiaceae	Rutstroemia	unclassified Rutstroemia	Rutstroemia sp. NJR-2017a WRK4
2	root	cellular organisms	Eukaryota	Opisthokonta	Fungi	Dikarya	Ascomycota	saccharomyceta	Pezizomycotina	leotiomyceta	sordariomyceta	Leotiomycetes
2	root	cellular organisms	Eukaryota	Opisthokonta	Fungi	Dikarya	Ascomycota	saccharomyceta	Pezizomycotina	leotiomyceta	dothideomyceta	Dothideomycetes	Pleosporomycetidae	Pleosporales	Pleosporineae	Pleosporaceae	Alternaria	Alternaria sect. Alternaria	Alternaria gaisen
2	root	cellular organisms	Eukaryota	Opisthokonta	Fungi	Dikarya	Ascomycota	saccharomyceta	Pezizomycotina	leotiomyceta	dothideomyceta	Dothideomycetes	Pleosporomycetidae	Pleosporales	Pleosporineae	Pleosporaceae	Alternaria	Alternaria sect. Alternaria	Alternaria alternata complex	Alternaria alternata
2	root	cellular organisms	Eukaryota	Opisthokonta	Fungi	Dikarya	Ascomycota	saccharomyceta	Pezizomycotina	leotiomyceta	dothideomyceta	Dothideomycetes	Pleosporomycetidae	Pleosporales	Pleosporineae	Pleosporaceae	Alternaria	Alternaria sect. Alternaria
2	root	cellular organisms	Eukaryota	Opisthokonta	Fungi	Dikarya	Ascomycota	saccharomyceta	Pezizomycotina	leotiomyceta	dothideomyceta	Dothideomycetes	Pleosporomycetidae	Pleosporales	Lindgomycetaceae	Lindgomyces	Lindgomyces ingoldianus
2	root	cellular organisms	Eukaryota	Opisthokonta	Fungi	Dikarya	Ascomycota	saccharomyceta	Pezizomycotina	leotiomyceta	dothideomyceta	Dothideomycetes	Pleosporomycetidae	Mytilinidiales	Mytilinidiaceae	Mytilinidion	Mytilinidion resinicola
2	root	cellular organisms	Eukaryota	Opisthokonta	Fungi	Dikarya	Ascomycota	saccharomyceta	Pezizomycotina	leotiomyceta	Eurotiomycetes	Eurotiomycetidae	Eurotiales	Aspergillaceae	Aspergillus	Aspergillus subgen. Circumdati	Aspergillus niger	Aspergillus niger ATCC 1015
2	root	cellular organisms	Eukaryota	Opisthokonta	Fungi	Dikarya	Ascomycota	saccharomyceta	Pezizomycotina	Pezizomycetes	Pezizales	Pyronemataceae	Sphaerosporella	Sphaerosporella brunnea
2	root	cellular organisms	Bacteria	Proteobacteria	Gammaproteobacteria
2	root	cellular organisms	Eukaryota	Sar	Stramenopiles	Oomycota	Saprolegniales	Saprolegniaceae	Aphanomyces	Aphanomyces astaci
2	root	cellular organisms	Bacteria	Terrabacteria group	Firmicutes	Bacilli	Lactobacillales	Streptococcaceae	Streptococcus	Streptococcus agalactiae
2	root	cellular organisms	Bacteria	Terrabacteria group	Firmicutes	Bacilli	Bacillales	Bacillaceae
1	root	cellular organisms	Eukaryota	Amoebozoa	Evosea	Variosea	Cavosteliida	Cavosteliaceae	Planoprotostelium	Planoprotostelium fungivorum
1	root	cellular organisms	Eukaryota	Amoebozoa	Evosea	Eumycetozoa	Dictyostelia	Dictyosteliales	Dictyosteliaceae	Dictyostelium	Dictyostelium purpureum
1	root	cellular organisms	Eukaryota	Opisthokonta	Fungi	Fungi incertae sedis	Mucoromycota	Mortierellomycotina	Mortierellomycetes	Mortierellales	Mortierellaceae
1	root	cellular organisms	Eukaryota	Opisthokonta	Fungi	Fungi incertae sedis	Mucoromycota	Glomeromycotina	Glomeromycetes	Diversisporales	Gigasporaceae	Gigaspora	Gigaspora margarita
1	root	cellular organisms	Eukaryota	Opisthokonta	Fungi	Fungi incertae sedis	Chytridiomycota	Chytridiomycota incertae sedis	Chytridiomycetes	Chytridiales	Chytridiaceae	Phlyctochytrium	Phlyctochytrium planicorne
1	root	cellular organisms	Eukaryota	Opisthokonta	Fungi	Fungi incertae sedis
1	root	cellular organisms	Eukaryota	Opisthokonta	Fungi	Dikarya	Basidiomycota	Ustilaginomycotina	Exobasidiomycetes	Exobasidiales	Cryptobasidiaceae	Acaromyces	Acaromyces ingoldii
1	root	cellular organisms	Eukaryota	Opisthokonta	Fungi	Dikarya	Basidiomycota	Agaricomycotina	Agaricomycetes	Agaricomycetidae	Agaricales	Pleurotaceae	Pleurotus	Pleurotus pulmonarius
1	root	cellular organisms	Eukaryota	Opisthokonta	Fungi	Dikarya	Basidiomycota	Agaricomycotina	Agaricomycetes	Agaricomycetidae	Agaricales	Amanitaceae	Amanita	Amanita muscaria	Amanita muscaria Koide BX008
1	root	cellular organisms	Eukaryota	Opisthokonta	Fungi	Dikarya	Basidiomycota	Agaricomycotina	Agaricomycetes	Agaricomycetidae	Agaricales	Agaricales incertae sedis	Infundibulicybe	Infundibulicybe gibba
1	root	cellular organisms	Eukaryota	Opisthokonta	Fungi	Dikarya	Basidiomycota	Agaricomycotina	Agaricomycetes	Agaricomycetes incertae sedis	Polyporales	Polyporaceae	Dichomitus	Dichomitus squalens
1	root	cellular organisms	Eukaryota	Opisthokonta	Fungi	Dikarya	Basidiomycota	Agaricomycotina	Agaricomycetes	Agaricomycetes incertae sedis	Hymenochaetales	Hymenochaetaceae	Phellinidium	Phellinidium pouzarii
1	root	cellular organisms	Eukaryota	Opisthokonta	Fungi	Dikarya	Basidiomycota	Agaricomycotina	Agaricomycetes
1	root	cellular organisms	Eukaryota	Opisthokonta	Fungi	Dikarya	Ascomycota	saccharomyceta	Saccharomycotina	Saccharomycetes	Saccharomycetales	Saccharomycetaceae
1	root	cellular organisms	Eukaryota	Opisthokonta	Fungi	Dikarya	Ascomycota	saccharomyceta	Saccharomycotina	Saccharomycetes	Saccharomycetales	Dipodascaceae	Yarrowia	Yarrowia lipolytica
1	root	cellular organisms	Eukaryota	Opisthokonta	Fungi	Dikarya	Ascomycota	saccharomyceta	Saccharomycotina	Saccharomycetes	Saccharomycetales	Debaryomycetaceae	Meyerozyma
1	root	cellular organisms	Eukaryota	Opisthokonta	Fungi	Dikarya	Ascomycota	saccharomyceta	Saccharomycotina	Saccharomycetes	Saccharomycetales	Debaryomycetaceae	Candida/Lodderomyces clade	Candida	Candida albicans	Candida albicans P57055
1	root	cellular organisms	Eukaryota	Opisthokonta	Fungi	Dikarya	Ascomycota	saccharomyceta	Pezizomycotina	leotiomyceta	sordariomyceta	Sordariomycetes	Xylariomycetidae	Xylariales	Xylariales incertae sedis	Monosporascus	unclassified Monosporascus
1	root	cellular organisms	Eukaryota	Opisthokonta	Fungi	Dikarya	Ascomycota	saccharomyceta	Pezizomycotina	leotiomyceta	sordariomyceta	Sordariomycetes	Sordariomycetidae	Sordariales	Sordariales incertae sedis	Madurella	Madurella mycetomatis
1	root	cellular organisms	Eukaryota	Opisthokonta	Fungi	Dikarya	Ascomycota	saccharomyceta	Pezizomycotina	leotiomyceta	sordariomyceta	Sordariomycetes	Sordariomycetidae	Sordariales	Sordariaceae	Neurospora
1	root	cellular organisms	Eukaryota	Opisthokonta	Fungi	Dikarya	Ascomycota	saccharomyceta	Pezizomycotina	leotiomyceta	sordariomyceta	Sordariomycetes	Sordariomycetidae	Sordariales	Chaetomiaceae	Thermothielavioides	Thermothielavioides terrestris
1	root	cellular organisms	Eukaryota	Opisthokonta	Fungi	Dikarya	Ascomycota	saccharomyceta	Pezizomycotina	leotiomyceta	sordariomyceta	Sordariomycetes	Sordariomycetidae	Sordariales	Chaetomiaceae	Podospora	Podospora anserina
1	root	cellular organisms	Eukaryota	Opisthokonta	Fungi	Dikarya	Ascomycota	saccharomyceta	Pezizomycotina	leotiomyceta	sordariomyceta	Sordariomycetes	Sordariomycetidae	Ophiostomatales	Ophiostomataceae	Sporothrix	Sporothrix globosa
1	root	cellular organisms	Eukaryota	Opisthokonta	Fungi	Dikarya	Ascomycota	saccharomyceta	Pezizomycotina	leotiomyceta	sordariomyceta	Sordariomycetes	Sordariomycetidae	Ophiostomatales	Ophiostomataceae	Ophiostoma	Ophiostoma piceae	Ophiostoma piceae UAMH 11346
1	root	cellular organisms	Eukaryota	Opisthokonta	Fungi	Dikarya	Ascomycota	saccharomyceta	Pezizomycotina	leotiomyceta	sordariomyceta	Sordariomycetes	Sordariomycetidae	Magnaporthales
1	root	cellular organisms	Eukaryota	Opisthokonta	Fungi	Dikarya	Ascomycota	saccharomyceta	Pezizomycotina	leotiomyceta	sordariomyceta	Sordariomycetes	Sordariomycetidae	Diaporthales	Valsaceae	Valsa	Valsa malicola
1	root	cellular organisms	Eukaryota	Opisthokonta	Fungi	Dikarya	Ascomycota	saccharomyceta	Pezizomycotina	leotiomyceta	sordariomyceta	Sordariomycetes	Sordariomycetidae	Diaporthales	Valsaceae	Valsa	Valsa mali	Valsa mali var. pyri
1	root	cellular organisms	Eukaryota	Opisthokonta	Fungi	Dikarya	Ascomycota	saccharomyceta	Pezizomycotina	leotiomyceta	sordariomyceta	Sordariomycetes	Sordariomycetidae	Diaporthales	Valsaceae	Valsa
1	root	cellular organisms	Eukaryota	Opisthokonta	Fungi	Dikarya	Ascomycota	saccharomyceta	Pezizomycotina	leotiomyceta	sordariomyceta	Sordariomycetes	Sordariomycetidae	Diaporthales	Diaporthaceae	Diaporthe	Diaporthe ampelina
1	root	cellular organisms	Eukaryota	Opisthokonta	Fungi	Dikarya	Ascomycota	saccharomyceta	Pezizomycotina	leotiomyceta	sordariomyceta	Sordariomycetes	Sordariomycetidae	Coniochaetales	Coniochaetaceae	Coniochaeta	Coniochaeta pulveracea
1	root	cellular organisms	Eukaryota	Opisthokonta	Fungi	Dikarya	Ascomycota	saccharomyceta	Pezizomycotina	leotiomyceta	sordariomyceta	Sordariomycetes	Hypocreomycetidae	Microascales	Ceratocystidaceae	Ceratocystis	Ceratocystis cacaofunesta
1	root	cellular organisms	Eukaryota	Opisthokonta	Fungi	Dikarya	Ascomycota	saccharomyceta	Pezizomycotina	leotiomyceta	sordariomyceta	Sordariomycetes	Hypocreomycetidae	Microascales	Ceratocystidaceae	Berkeleyomyces	Berkeleyomyces basicola
1	root	cellular organisms	Eukaryota	Opisthokonta	Fungi	Dikarya	Ascomycota	saccharomyceta	Pezizomycotina	leotiomyceta	sordariomyceta	Sordariomycetes	Hypocreomycetidae	Hypocreales	Stachybotryaceae	Stachybotrys	Stachybotrys chlorohalonata	Stachybotrys chlorohalonata IBT 40285
1	root	cellular organisms	Eukaryota	Opisthokonta	Fungi	Dikarya	Ascomycota	saccharomyceta	Pezizomycotina	leotiomyceta	sordariomyceta	Sordariomycetes	Hypocreomycetidae	Hypocreales	Stachybotryaceae	Stachybotrys	Stachybotrys chartarum	Stachybotrys chartarum IBT 7711
1	root	cellular organisms	Eukaryota	Opisthokonta	Fungi	Dikarya	Ascomycota	saccharomyceta	Pezizomycotina	leotiomyceta	sordariomyceta	Sordariomycetes	Hypocreomycetidae	Hypocreales	Stachybotryaceae	Stachybotrys
1	root	cellular organisms	Eukaryota	Opisthokonta	Fungi	Dikarya	Ascomycota	saccharomyceta	Pezizomycotina	leotiomyceta	sordariomyceta	Sordariomycetes	Hypocreomycetidae	Hypocreales	Ophiocordycipitaceae	Tolypocladium	Tolypocladium paradoxum
1	root	cellular organisms	Eukaryota	Opisthokonta	Fungi	Dikarya	Ascomycota	saccharomyceta	Pezizomycotina	leotiomyceta	sordariomyceta	Sordariomycetes	Hypocreomycetidae	Hypocreales	Ophiocordycipitaceae	Tolypocladium	Tolypocladium ophioglossoides	Tolypocladium ophioglossoides CBS 100239
1	root	cellular organisms	Eukaryota	Opisthokonta	Fungi	Dikarya	Ascomycota	saccharomyceta	Pezizomycotina	leotiomyceta	sordariomyceta	Sordariomycetes	Hypocreomycetidae	Hypocreales	Ophiocordycipitaceae	Purpureocillium	Purpureocillium lilacinum
1	root	cellular organisms	Eukaryota	Opisthokonta	Fungi	Dikarya	Ascomycota	saccharomyceta	Pezizomycotina	leotiomyceta	sordariomyceta	Sordariomycetes	Hypocreomycetidae	Hypocreales	Ophiocordycipitaceae	Ophiocordyceps	unclassified Ophiocordyceps	Ophiocordyceps camponoti-leonardi (nom. inval.)
1	root	cellular organisms	Eukaryota	Opisthokonta	Fungi	Dikarya	Ascomycota	saccharomyceta	Pezizomycotina	leotiomyceta	sordariomyceta	Sordariomycetes	Hypocreomycetidae	Hypocreales	Ophiocordycipitaceae	Ophiocordyceps	Ophiocordyceps sinensis	Ophiocordyceps sinensis CO18
1	root	cellular organisms	Eukaryota	Opisthokonta	Fungi	Dikarya	Ascomycota	saccharomyceta	Pezizomycotina	leotiomyceta	sordariomyceta	Sordariomycetes	Hypocreomycetidae	Hypocreales	Ophiocordycipitaceae	Ophiocordyceps	Ophiocordyceps sinensis
1	root	cellular organisms	Eukaryota	Opisthokonta	Fungi	Dikarya	Ascomycota	saccharomyceta	Pezizomycotina	leotiomyceta	sordariomyceta	Sordariomycetes	Hypocreomycetidae	Hypocreales	Ophiocordycipitaceae	Hirsutella	Hirsutella minnesotensis	Hirsutella minnesotensis 3608
1	root	cellular organisms	Eukaryota	Opisthokonta	Fungi	Dikarya	Ascomycota	saccharomyceta	Pezizomycotina	leotiomyceta	sordariomyceta	Sordariomycetes	Hypocreomycetidae	Hypocreales	Ophiocordycipitaceae
1	root	cellular organisms	Eukaryota	Opisthokonta	Fungi	Dikarya	Ascomycota	saccharomyceta	Pezizomycotina	leotiomyceta	sordariomyceta	Sordariomycetes	Hypocreomycetidae	Hypocreales	Nectriaceae	Sarcopodium	Sarcopodium circinatum
1	root	cellular organisms	Eukaryota	Opisthokonta	Fungi	Dikarya	Ascomycota	saccharomyceta	Pezizomycotina	leotiomyceta	sordariomyceta	Sordariomycetes	Hypocreomycetidae	Hypocreales	Nectriaceae	Fusarium	Fusarium staphyleae species complex	Fusarium zealandicum
1	root	cellular organisms	Eukaryota	Opisthokonta	Fungi	Dikarya	Ascomycota	saccharomyceta	Pezizomycotina	leotiomyceta	sordariomyceta	Sordariomycetes	Hypocreomycetidae	Hypocreales	Nectriaceae	Fusarium	Fusarium solani species complex	unclassified Fusarium solani species complex	Fusarium sp. AF-8
1	root	cellular organisms	Eukaryota	Opisthokonta	Fungi	Dikarya	Ascomycota	saccharomyceta	Pezizomycotina	leotiomyceta	sordariomyceta	Sordariomycetes	Hypocreomycetidae	Hypocreales	Nectriaceae	Fusarium	Fusarium solani species complex	unclassified Fusarium solani species complex	Fusarium sp. AF-6
1	root	cellular organisms	Eukaryota	Opisthokonta	Fungi	Dikarya	Ascomycota	saccharomyceta	Pezizomycotina	leotiomyceta	sordariomyceta	Sordariomycetes	Hypocreomycetidae	Hypocreales	Nectriaceae	Fusarium	Fusarium solani species complex	unclassified Fusarium solani species complex	Fusarium sp. AF-4
1	root	cellular organisms	Eukaryota	Opisthokonta	Fungi	Dikarya	Ascomycota	saccharomyceta	Pezizomycotina	leotiomyceta	sordariomyceta	Sordariomycetes	Hypocreomycetidae	Hypocreales	Nectriaceae	Fusarium	Fusarium sambucinum species complex	Fusarium poae
1	root	cellular organisms	Eukaryota	Opisthokonta	Fungi	Dikarya	Ascomycota	saccharomyceta	Pezizomycotina	leotiomyceta	sordariomyceta	Sordariomycetes	Hypocreomycetidae	Hypocreales	Nectriaceae	Fusarium	Fusarium oxysporum species complex	Fusarium oxysporum	Fusarium oxysporum f. sp. cubense
1	root	cellular organisms	Eukaryota	Opisthokonta	Fungi	Dikarya	Ascomycota	saccharomyceta	Pezizomycotina	leotiomyceta	sordariomyceta	Sordariomycetes	Hypocreomycetidae	Hypocreales	Nectriaceae	Fusarium	Fusarium oxysporum species complex	Fusarium oxysporum	Fusarium oxysporum f. sp. conglutinans
1	root	cellular organisms	Eukaryota	Opisthokonta	Fungi	Dikarya	Ascomycota	saccharomyceta	Pezizomycotina	leotiomyceta	sordariomyceta	Sordariomycetes	Hypocreomycetidae	Hypocreales	Nectriaceae	Fusarium	Fusarium oxysporum species complex	Fusarium oxysporum	Fusarium oxysporum f. sp. cepae
1	root	cellular organisms	Eukaryota	Opisthokonta	Fungi	Dikarya	Ascomycota	saccharomyceta	Pezizomycotina	leotiomyceta	sordariomyceta	Sordariomycetes	Hypocreomycetidae	Hypocreales	Nectriaceae	Fusarium	Fusarium oxysporum species complex	Fusarium oxysporum	Fusarium oxysporum Fo5176
1	root	cellular organisms	Eukaryota	Opisthokonta	Fungi	Dikarya	Ascomycota	saccharomyceta	Pezizomycotina	leotiomyceta	sordariomyceta	Sordariomycetes	Hypocreomycetidae	Hypocreales	Nectriaceae	Fusarium	Fusarium fujikuroi species complex	Fusarium mundagurra
1	root	cellular organisms	Eukaryota	Opisthokonta	Fungi	Dikarya	Ascomycota	saccharomyceta	Pezizomycotina	leotiomyceta	sordariomyceta	Sordariomycetes	Hypocreomycetidae	Hypocreales	Nectriaceae	Fusarium	Fusarium fujikuroi species complex	Fusarium mangiferae
1	root	cellular organisms	Eukaryota	Opisthokonta	Fungi	Dikarya	Ascomycota	saccharomyceta	Pezizomycotina	leotiomyceta	sordariomyceta	Sordariomycetes	Hypocreomycetidae	Hypocreales	Nectriaceae	Fusarium	Fusarium fujikuroi species complex	Fusarium denticulatum
1	root	cellular organisms	Eukaryota	Opisthokonta	Fungi	Dikarya	Ascomycota	saccharomyceta	Pezizomycotina	leotiomyceta	sordariomyceta	Sordariomycetes	Hypocreomycetidae	Hypocreales	Nectriaceae
1	root	cellular organisms	Eukaryota	Opisthokonta	Fungi	Dikarya	Ascomycota	saccharomyceta	Pezizomycotina	leotiomyceta	sordariomyceta	Sordariomycetes	Hypocreomycetidae	Hypocreales	Hypocreaceae	Trichoderma	Trichoderma reesei	Trichoderma reesei QM6a
1	root	cellular organisms	Eukaryota	Opisthokonta	Fungi	Dikarya	Ascomycota	saccharomyceta	Pezizomycotina	leotiomyceta	sordariomyceta	Sordariomycetes	Hypocreomycetidae	Hypocreales	Hypocreaceae	Trichoderma
1	root	cellular organisms	Eukaryota	Opisthokonta	Fungi	Dikarya	Ascomycota	saccharomyceta	Pezizomycotina	leotiomyceta	sordariomyceta	Sordariomycetes	Hypocreomycetidae	Hypocreales	Cordycipitaceae	Akanthomyces	Akanthomyces lecanii	Akanthomyces lecanii RCEF 1005
1	root	cellular organisms	Eukaryota	Opisthokonta	Fungi	Dikarya	Ascomycota	saccharomyceta	Pezizomycotina	leotiomyceta	sordariomyceta	Sordariomycetes	Hypocreomycetidae	Hypocreales	Clavicipitaceae	Pochonia	Pochonia chlamydosporia	Pochonia chlamydosporia 170
1	root	cellular organisms	Eukaryota	Opisthokonta	Fungi	Dikarya	Ascomycota	saccharomyceta	Pezizomycotina	leotiomyceta	sordariomyceta	Sordariomycetes	Hypocreomycetidae	Hypocreales	Clavicipitaceae	Metarhizium	Metarhizium guizhouense	Metarhizium guizhouense ARSEF 977
1	root	cellular organisms	Eukaryota	Opisthokonta	Fungi	Dikarya	Ascomycota	saccharomyceta	Pezizomycotina	leotiomyceta	sordariomyceta	Sordariomycetes	Hypocreomycetidae	Hypocreales	Clavicipitaceae	Metarhizium	Metarhizium album	Metarhizium album ARSEF 1941
1	root	cellular organisms	Eukaryota	Opisthokonta	Fungi	Dikarya	Ascomycota	saccharomyceta	Pezizomycotina	leotiomyceta	sordariomyceta	Sordariomycetes	Hypocreomycetidae	Hypocreales	Bionectriaceae	Clonostachys	Clonostachys rosea
1	root	cellular organisms	Eukaryota	Opisthokonta	Fungi	Dikarya	Ascomycota	saccharomyceta	Pezizomycotina	leotiomyceta	sordariomyceta	Sordariomycetes	Hypocreomycetidae	Glomerellales	Plectosphaerellaceae	Verticillium
1	root	cellular organisms	Eukaryota	Opisthokonta	Fungi	Dikarya	Ascomycota	saccharomyceta	Pezizomycotina	leotiomyceta	sordariomyceta	Sordariomycetes	Hypocreomycetidae	Glomerellales	Plectosphaerellaceae	Sodiomyces	Sodiomyces alkalinus	Sodiomyces alkalinus F11
1	root	cellular organisms	Eukaryota	Opisthokonta	Fungi	Dikarya	Ascomycota	saccharomyceta	Pezizomycotina	leotiomyceta	sordariomyceta	Sordariomycetes	Hypocreomycetidae	Glomerellales	Glomerellaceae	Colletotrichum	Colletotrichum spaethianum species complex
1	root	cellular organisms	Eukaryota	Opisthokonta	Fungi	Dikarya	Ascomycota	saccharomyceta	Pezizomycotina	leotiomyceta	sordariomyceta	Sordariomycetes	Hypocreomycetidae	Glomerellales	Glomerellaceae	Colletotrichum	Colletotrichum acutatum species complex
1	root	cellular organisms	Eukaryota	Opisthokonta	Fungi	Dikarya	Ascomycota	saccharomyceta	Pezizomycotina	leotiomyceta	sordariomyceta	Leotiomycetes	Helotiales	Sclerotiniaceae	Botryotinia	Botryotinia squamosa
1	root	cellular organisms	Eukaryota	Opisthokonta	Fungi	Dikarya	Ascomycota	saccharomyceta	Pezizomycotina	leotiomyceta	sordariomyceta	Leotiomycetes	Helotiales	Helotiales incertae sedis	Cadophora	unclassified Cadophora	Cadophora sp. DSE1049
1	root	cellular organisms	Eukaryota	Opisthokonta	Fungi	Dikarya	Ascomycota	saccharomyceta	Pezizomycotina	leotiomyceta	sordariomyceta	Leotiomycetes	Helotiales	Dermateaceae	Marssonina	Marssonina brunnea	Marssonina brunnea f. sp. 'multigermtubi'	Marssonina brunnea f. sp. 'multigermtubi' MB_m1
1	root	cellular organisms	Eukaryota	Opisthokonta	Fungi	Dikarya	Ascomycota	saccharomyceta	Pezizomycotina	leotiomyceta	dothideomyceta	Dothideomycetes	Pleosporomycetidae	Venturiales	Venturiaceae	Venturia	Venturia pyrina
1	root	cellular organisms	Eukaryota	Opisthokonta	Fungi	Dikarya	Ascomycota	saccharomyceta	Pezizomycotina	leotiomyceta	dothideomyceta	Dothideomycetes	Pleosporomycetidae	Venturiales	Venturiaceae	Venturia	Venturia inaequalis
1	root	cellular organisms	Eukaryota	Opisthokonta	Fungi	Dikarya	Ascomycota	saccharomyceta	Pezizomycotina	leotiomyceta	dothideomyceta	Dothideomycetes	Pleosporomycetidae	Pleosporales	Pleosporineae	Leptosphaeriaceae	Plenodomus	Plenodomus tracheiphilus	Plenodomus tracheiphilus IPT5
1	root	cellular organisms	Eukaryota	Opisthokonta	Fungi	Dikarya	Ascomycota	saccharomyceta	Pezizomycotina	leotiomyceta	dothideomyceta	Dothideomycetes	Pleosporomycetidae	Pleosporales	Pleosporineae	Leptosphaeriaceae	Ampelomyces	Ampelomyces quisqualis
1	root	cellular organisms	Eukaryota	Opisthokonta	Fungi	Dikarya	Ascomycota	saccharomyceta	Pezizomycotina	leotiomyceta	dothideomyceta	Dothideomycetes	Pleosporomycetidae	Pleosporales	Delitschiaceae	Delitschia	Delitschia confertaspora	Delitschia confertaspora ATCC 74209
1	root	cellular organisms	Eukaryota	Opisthokonta	Fungi	Dikarya	Ascomycota	saccharomyceta	Pezizomycotina	leotiomyceta	dothideomyceta	Dothideomycetes	Pleosporomycetidae
1	root	cellular organisms	Eukaryota	Opisthokonta	Fungi	Dikarya	Ascomycota	saccharomyceta	Pezizomycotina	leotiomyceta	dothideomyceta	Dothideomycetes	Dothideomycetidae	Mycosphaerellales	Teratosphaeriaceae	Hortaea	Hortaea werneckii
1	root	cellular organisms	Eukaryota	Opisthokonta	Fungi	Dikarya	Ascomycota	saccharomyceta	Pezizomycotina	leotiomyceta	dothideomyceta	Dothideomycetes	Dothideomycetidae	Mycosphaerellales	Teratosphaeriaceae	Hortaea	Hortaea thailandica
1	root	cellular organisms	Eukaryota	Opisthokonta	Fungi	Dikarya	Ascomycota	saccharomyceta	Pezizomycotina	leotiomyceta	dothideomyceta	Dothideomycetes	Dothideomycetidae	Mycosphaerellales	Teratosphaeriaceae	Friedmanniomyces	Friedmanniomyces endolithicus
1	root	cellular organisms	Eukaryota	Opisthokonta	Fungi	Dikarya	Ascomycota	saccharomyceta	Pezizomycotina	leotiomyceta	dothideomyceta	Dothideomycetes	Dothideomycetidae	Mycosphaerellales	Mycosphaerellaceae	Ramularia	Ramularia grevilleana
1	root	cellular organisms	Eukaryota	Opisthokonta	Fungi	Dikarya	Ascomycota	saccharomyceta	Pezizomycotina	leotiomyceta	dothideomyceta	Dothideomycetes	Dothideomycetidae	Dothideales	Saccotheciaceae	Aureobasidium	Aureobasidium subglaciale	Aureobasidium subglaciale EXF-2481
1	root	cellular organisms	Eukaryota	Opisthokonta	Fungi	Dikarya	Ascomycota	saccharomyceta	Pezizomycotina	leotiomyceta	dothideomyceta	Dothideomycetes	Dothideomycetidae	Dothideales	Saccotheciaceae	Aureobasidium	Aureobasidium pullulans
1	root	cellular organisms	Eukaryota	Opisthokonta	Fungi	Dikarya	Ascomycota	saccharomyceta	Pezizomycotina	leotiomyceta	dothideomyceta	Dothideomycetes	Dothideomycetidae	Dothideales	Saccotheciaceae	Aureobasidium
1	root	cellular organisms	Eukaryota	Opisthokonta	Fungi	Dikarya	Ascomycota	saccharomyceta	Pezizomycotina	leotiomyceta	dothideomyceta	Dothideomycetes	Dothideomycetidae	Cladosporiales	Cladosporiaceae	Rachicladosporium
1	root	cellular organisms	Eukaryota	Opisthokonta	Fungi	Dikarya	Ascomycota	saccharomyceta	Pezizomycotina	leotiomyceta	dothideomyceta	Dothideomycetes	Dothideomycetidae	Capnodiales	Piedraiaceae	Piedraia	Piedraia hortae	Piedraia hortae CBS 480.64
1	root	cellular organisms	Eukaryota	Opisthokonta	Fungi	Dikarya	Ascomycota	saccharomyceta	Pezizomycotina	leotiomyceta	dothideomyceta	Dothideomycetes	Dothideomycetes incertae sedis	Pseudoperisporiaceae	Lizonia	Lizonia empirigonia
1	root	cellular organisms	Eukaryota	Opisthokonta	Fungi	Dikarya	Ascomycota	saccharomyceta	Pezizomycotina	leotiomyceta	Lecanoromycetes	OSLEUM clade	Lecanoromycetidae	Lecanorales	Lecanorineae	Parmeliaceae	Menegazzia	Menegazzia cincinnata
1	root	cellular organisms	Eukaryota	Opisthokonta	Fungi	Dikarya	Ascomycota	saccharomyceta	Pezizomycotina	leotiomyceta	Eurotiomycetes	Eurotiomycetidae	Onygenales	Onygenales incertae sedis	Paracoccidioides	Paracoccidioides lutzii	Paracoccidioides lutzii Pb01
1	root	cellular organisms	Eukaryota	Opisthokonta	Fungi	Dikarya	Ascomycota	saccharomyceta	Pezizomycotina	leotiomyceta	Eurotiomycetes	Eurotiomycetidae	Onygenales	Onygenales incertae sedis	Paracoccidioides
1	root	cellular organisms	Eukaryota	Opisthokonta	Fungi	Dikarya	Ascomycota	saccharomyceta	Pezizomycotina	leotiomyceta	Eurotiomycetes	Eurotiomycetidae	Onygenales	Arthrodermataceae	Arthroderma	Arthroderma uncinatum
1	root	cellular organisms	Eukaryota	Opisthokonta	Fungi	Dikarya	Ascomycota	saccharomyceta	Pezizomycotina	leotiomyceta	Eurotiomycetes	Eurotiomycetidae	Onygenales	Arthrodermataceae
1	root	cellular organisms	Eukaryota	Opisthokonta	Fungi	Dikarya	Ascomycota	saccharomyceta	Pezizomycotina	leotiomyceta	Eurotiomycetes	Eurotiomycetidae	Eurotiales	Trichocomaceae	Talaromyces	Talaromyces sect. Islandici	Talaromyces islandicus
1	root	cellular organisms	Eukaryota	Opisthokonta	Fungi	Dikarya	Ascomycota	saccharomyceta	Pezizomycotina	leotiomyceta	Eurotiomycetes	Eurotiomycetidae	Eurotiales	Thermoascaceae	Byssochlamys	Byssochlamys spectabilis
1	root	cellular organisms	Eukaryota	Opisthokonta	Fungi	Dikarya	Ascomycota	saccharomyceta	Pezizomycotina	leotiomyceta	Eurotiomycetes	Eurotiomycetidae	Eurotiales	Aspergillaceae	Penicillium
1	root	cellular organisms	Eukaryota	Opisthokonta	Fungi	Dikarya	Ascomycota	saccharomyceta	Pezizomycotina	leotiomyceta	Eurotiomycetes	Eurotiomycetidae	Eurotiales	Aspergillaceae	Aspergillus	Aspergillus subgen. Polypaecilum	Aspergillus sclerotialis
1	root	cellular organisms	Eukaryota	Opisthokonta	Fungi	Dikarya	Ascomycota	saccharomyceta	Pezizomycotina	leotiomyceta	Eurotiomycetes	Eurotiomycetidae	Eurotiales	Aspergillaceae	Aspergillus	Aspergillus subgen. Nidulantes	Aspergillus ochraceoroseus	Aspergillus ochraceoroseus IBT 24754
1	root	cellular organisms	Eukaryota	Opisthokonta	Fungi	Dikarya	Ascomycota	saccharomyceta	Pezizomycotina	leotiomyceta	Eurotiomycetes	Eurotiomycetidae	Eurotiales	Aspergillaceae	Aspergillus	Aspergillus subgen. Circumdati	Aspergillus oryzae
1	root	cellular organisms	Eukaryota	Opisthokonta	Fungi	Dikarya	Ascomycota	saccharomyceta	Pezizomycotina	leotiomyceta	Eurotiomycetes	Eurotiomycetidae	Eurotiales	Aspergillaceae	Aspergillus	Aspergillus subgen. Circumdati	Aspergillus flavus
1	root	cellular organisms	Eukaryota	Opisthokonta	Fungi	Dikarya	Ascomycota	saccharomyceta	Pezizomycotina	leotiomyceta	Eurotiomycetes	Eurotiomycetidae	Eurotiales	Aspergillaceae	Aspergillus	Aspergillus eucalypticola	Aspergillus eucalypticola CBS 122712
1	root	cellular organisms	Eukaryota	Opisthokonta	Fungi	Dikarya	Ascomycota	saccharomyceta	Pezizomycotina	leotiomyceta	Eurotiomycetes	Eurotiomycetidae	Eurotiales	Aspergillaceae
1	root	cellular organisms	Eukaryota	Opisthokonta	Fungi	Dikarya	Ascomycota	saccharomyceta	Pezizomycotina	leotiomyceta	Eurotiomycetes	Chaetothyriomycetidae	Chaetothyriales	unclassified Chaetothyriales
1	root	cellular organisms	Eukaryota	Opisthokonta	Fungi	Dikarya	Ascomycota	saccharomyceta	Pezizomycotina	leotiomyceta	Eurotiomycetes	Chaetothyriomycetidae	Chaetothyriales	Herpotrichiellaceae	Exophiala	Exophiala mesophila
1	root	cellular organisms	Eukaryota	Opisthokonta	Fungi	Dikarya	Ascomycota	saccharomyceta	Pezizomycotina	leotiomyceta	Eurotiomycetes
1	root	cellular organisms	Eukaryota	Opisthokonta	Fungi	Dikarya	Ascomycota	saccharomyceta	Pezizomycotina	Pezizomycetes	Pezizales	Pyronemataceae	Pyronema	Pyronema omphalodes	Pyronema omphalodes CBS 100304
1	root	cellular organisms	Eukaryota	Opisthokonta	Fungi	Dikarya	Ascomycota	saccharomyceta	Pezizomycotina	Pezizomycetes	Pezizales
1	root	cellular organisms	Eukaryota	Opisthokonta	Fungi	Dikarya	Ascomycota	Taphrinomycotina	Pneumocystidomycetes	Pneumocystidales	Pneumocystidaceae	Pneumocystis	Pneumocystis jirovecii
1	root	cellular organisms	Eukaryota	Opisthokonta	Fungi	Dikarya	Ascomycota	Taphrinomycotina	Neolectomycetes	Neolectales	Neolectaceae	Neolecta	Neolecta irregularis	Neolecta irregularis DAH-3
1	root	cellular organisms	Eukaryota	Opisthokonta	Fungi	Dikarya	Ascomycota
1	root	cellular organisms	Bacteria	Proteobacteria	Gammaproteobacteria	Pseudomonadales	Pseudomonadaceae	Pseudomonas	Pseudomonas syringae group	Pseudomonas syringae group genomosp. 2	Pseudomonas savastanoi	Pseudomonas savastanoi pv. phaseolicola
1	root	cellular organisms	Bacteria	Proteobacteria	Gammaproteobacteria	Pseudomonadales	Pseudomonadaceae	Pseudomonas	Pseudomonas fluorescens group	Pseudomonas fluorescens
1	root	cellular organisms	Bacteria	Proteobacteria	Gammaproteobacteria	Pseudomonadales	Pseudomonadaceae	Pseudomonas
1	root	cellular organisms	Bacteria	Proteobacteria	Gammaproteobacteria	Pseudomonadales	Moraxellaceae	Acinetobacter	Acinetobacter calcoaceticus/baumannii complex	Acinetobacter baumannii
1	root	cellular organisms	Bacteria	Proteobacteria	Gammaproteobacteria	Pseudomonadales	Moraxellaceae	Acinetobacter
1	root	cellular organisms	Bacteria	Proteobacteria	Gammaproteobacteria	Legionellales	Legionellaceae	Legionella	Legionella feeleii
1	root	cellular organisms	Bacteria	Proteobacteria	Gammaproteobacteria	Legionellales	Legionellaceae	Legionella
1	root	cellular organisms	Bacteria	Proteobacteria	Gammaproteobacteria	Enterobacterales	Enterobacteriaceae	Shigella	Shigella sonnei
1	root	cellular organisms	Bacteria	Proteobacteria	Gammaproteobacteria	Enterobacterales	Enterobacteriaceae	Escherichia	Escherichia coli	Escherichia coli UMEA 3212-1
1	root	cellular organisms	Bacteria	Proteobacteria	Gammaproteobacteria	Enterobacterales	Enterobacteriaceae	Escherichia	Escherichia coli	Escherichia coli O25b:H4
1	root	cellular organisms	Bacteria	Proteobacteria	Gammaproteobacteria	Enterobacterales	Enterobacteriaceae	Escherichia	Escherichia coli	Escherichia coli HVH 104 (4-6977960)
1	root	cellular organisms	Bacteria	Proteobacteria	Gammaproteobacteria	Enterobacterales	Enterobacteriaceae
1	root	cellular organisms	Bacteria	Proteobacteria	Gammaproteobacteria	Aeromonadales	Aeromonadaceae	Aeromonas	Aeromonas dhakensis
1	root	cellular organisms	Bacteria	Proteobacteria
1	root	cellular organisms	Eukaryota	Sar	Alveolata	Perkinsozoa	Perkinsea	Perkinsida	Perkinsidae	Perkinsus	Perkinsus marinus	Perkinsus marinus ATCC 50983
1	root	cellular organisms	Eukaryota	Sar	Alveolata	Ciliophora	Intramacronucleata	Spirotrichea	Hypotrichia	Euplotida	Euplotidae	Euplotes	Euplotes vannus
1	root	cellular organisms	Bacteria	Terrabacteria group	Firmicutes	Bacilli	Lactobacillales	Streptococcaceae	Streptococcus	Streptococcus mutans	Streptococcus mutans G123
1	root	cellular organisms	Bacteria	Terrabacteria group	Cyanobacteria/Melainabacteria group	Cyanobacteria	Nostocales	Nostocaceae	Nostoc	unclassified Nostoc	Nostoc sp. LEGE 12447
1	root	cellular organisms	Bacteria
1	root	Viruses	Riboviria	Orthornavirae	Lenarviricota	Howeltoviricetes	Cryppavirales	Mitoviridae	Mitovirus	unclassified Mitovirus	Mitovirus sp.
1	root	Viruses	Riboviria	Orthornavirae	Duplornaviricota	Chrymotiviricetes	Ghabrivirales	Totiviridae	unclassified Totiviridae	Totiviridae sp.
1	root	Viruses	Riboviria	Orthornavirae	Duplornaviricota	Chrymotiviricetes	Ghabrivirales	Totiviridae	unclassified Totiviridae	Diatom colony associated virus-Like RNA Segment 4
1	root	Viruses	Riboviria	Orthornavirae	Duplornaviricota	Chrymotiviricetes	Ghabrivirales	Totiviridae	Victorivirus	unclassified Victorivirus	Nigrospora oryzae victorivirus 2
1	root	Viruses	Riboviria	Orthornavirae	Duplornaviricota	Chrymotiviricetes	Ghabrivirales	Totiviridae	Victorivirus	unclassified Victorivirus	Colletotrichum fructicola victorivirus 1
1	root	Viruses	Riboviria	Orthornavirae	Duplornaviricota	Chrymotiviricetes	Ghabrivirales	Totiviridae	Victorivirus	unclassified Victorivirus	Botryosphaeria dothidea victorivirus 2
1	root
3238	Unclassified
