# Supplementary material for: Uncovering a Complex Virome Associated with the Cacao Pathogens Ceratocystis cacaofunesta and Ceratocystis fimbriata
Source: Pathogens. 2023 Feb 9;12(2):287. doi: 10.3390/pathogens12020287 (PMC9967352; doi:10.3390/pathogens12020287)
Supplement: Supplementary file 1 [file pathogens-12-00287-s001.zip › tableS5_RNAi_related_genes.xlsx]

## Sheet: results
Class	Nuerospora Crassa protein ID	Identity (%)	Ceratocystis fimbriata protein ID	Tag	Transcript	TPM
DCL	Q7S8J7|DCL1_NEUCR	42.8	PHH50670.1	CFIMG_003413RA	APWK03000021.1_mrna_2919	0.292909
DCL	Q7SCC1|DCL2_NEUCR	34.4	PHH55345.1	CFIMG_001061RA	APWK03000012.1_mrna_993	12.4766
MRPL3	Q7SA88|Q7SA88_NEUCR	56.5	PHH51213.1	CFIMG_007246RA00001	APWK03000100.1_mrna_259	50.3618
QDE	Q7SDG4|Q7SDG4_NEUCR	44.3	PHH53977.1	CFIMG_000986RA	APWK03000033.1_mrna_4015	11.0962
QDE2/SMS2	V5IKU0|V5IKU0_NEUCR	36.5	PHH51584.1	CFIMG_008656RA00001	APWK03000090.1_mrna_6979	284.21
QIP	U9W4S9|U9W4S9_NEUCR	32.3	PHH54443.1	CFIMG_003042RA	PWK03000026.1_mrna_3424	24.5413
SAD-1	Q7S3A3|Q7S3A3_NEUCR	34.7	PHH50118.1	CFIMG_005029RA	APWK03000147.1_mrna_1717	5.11652
SAD	Q1K907|Q1K907_NEUCR	42.3	PHH50567.1	CFIMG_004538RA	APWK03000124.1_mrna_1118	0.858896
SMS2	Q1K660|Q1K660_NEUCR	40.4	PHH49922.1	CFIMG_002952RA	APWK03000161.1_mrna_2066	1.36315

## Sheet: domains
PHH50670.1	.	1	1634	.
PHH50670.1	Pfam	735	825	2.0E-18	signature_desc=Dicer dimerisation domain	Name=PF03368	status=T
PHH50670.1	Pfam	1182	1288	1.0E-19	signature_desc=Ribonuclease III domain	Name=PF00636		status=T	Dbxref="InterPro:IPR000999"
PHH50670.1	Pfam	1384	1509	1.7E-16	signature_desc=Ribonuclease III domain	Name=PF00636		status=T	Dbxref="InterPro:IPR000999",
PHH50670.1	Pfam	545	658	8.8E-18	signature_desc=Helicase conserved C-terminal domain	Name=PF00271	status=T	Dbxref="InterPro:IPR001650"
PHH50670.1	Pfam	232	385	2.3E-9	signature_desc=Type III restriction enzyme, res subunit	Name=PF04851		status=T	Dbxref="InterPro:IPR006935"
sp|Q7S8J7|DCL1_NEUCR	.	1	1584	.
sp|Q7S8J7|DCL1_NEUCR	Pfam	654	740	3.9E-21	signature_desc=Dicer dimerisation domain	Name=PF03368	status=T
sp|Q7S8J7|DCL1_NEUCR	Pfam	461	577	4.8E-17	signature_desc=Helicase conserved C-terminal domain	Name=PF00271	status=T	Dbxref="InterPro:IPR001650"
sp|Q7S8J7|DCL1_NEUCR	Pfam	1295	1423	4.5E-19	signature_desc=Ribonuclease III domain	Name=PF00636		status=T	Dbxref="InterPro:IPR000999"
sp|Q7S8J7|DCL1_NEUCR	Pfam	1099	1206	6.7E-20	signature_desc=Ribonuclease III domain	Name=PF00636		status=T	Dbxref="InterPro:IPR000999"
sp|Q7S8J7|DCL1_NEUCR	Pfam	124	292	2.0E-14	signature_desc=Type III restriction enzyme, res subunit	Name=PF04851		status=T	Dbxref="InterPro:IPR006935"
PHH55345.1	.	1	1430	.
PHH55345.1	Pfam	429	540	2.9E-16	signature_desc=Helicase conserved C-terminal domain	Name=PF00271	status=T	Dbxref="InterPro:IPR001650"
PHH55345.1	Pfam	616	708	5.2E-22	signature_desc=Dicer dimerisation domain	Name=PF03368	status=T
PHH55345.1	Pfam	70	236	2.4E-18	signature_desc=DEAD/DEAH box helicase	Name=PF00270		status=T	Dbxref="InterPro:IPR011545"
PHH55345.1	ProSiteProfiles	973	1115	27.608747	signature_desc=Ribonuclease III family domain profile.	Name=PS50142		status=T	Dbxref="InterPro:IPR000999"
sp|Q7SCC1|DCL2_NEUCR	.	1	1534	.
sp|Q7SCC1|DCL2_NEUCR	Pfam	108	200	1.2E-7	signature_desc=DEAD/DEAH box helicase	Name=PF00270		status=T	Dbxref="InterPro:IPR011545"
sp|Q7SCC1|DCL2_NEUCR	Pfam	597	694	9.4E-20	signature_desc=Dicer dimerisation domain	Name=PF03368	status=T
sp|Q7SCC1|DCL2_NEUCR	ProSiteProfiles	974	1107	24.232201	signature_desc=Ribonuclease III family domain profile.	Name=PS50142		status=T	Dbxref="InterPro:IPR000999"
sp|Q7SCC1|DCL2_NEUCR	Pfam	404	526	1.6E-16	signature_desc=Helicase conserved C-terminal domain	Name=PF00271	status=T	Dbxref="InterPro:IPR001650"
PHH51213.1	.	1	451	.
PHH51213.1	ProSiteProfiles	118	206	11.583844	signature_desc=Ribonuclease III family domain profile.		Name=PS50142	status=T	Dbxref="InterPro:IPR000999"
PHH51213.1	SUPERFAMILY	350	427	7.23E-11	Name=SSF54768	status=T
tr|Q7SA88|Q7SA88_NEUCR	.	1	439	.
tr|Q7SA88|Q7SA88_NEUCR	ProSiteProfiles	85	174	13.463758	signature_desc=Ribonuclease III family domain profile.		Name=PS50142	status=T	Dbxref="InterPro:IPR000999"
tr|Q7SA88|Q7SA88_NEUCR	SUPERFAMILY	333	415	5.62E-10	Name=SSF54768	status=T	dsRNA-binding domain-like
PHH51584.1	.	1	1004	.
PHH51584.1	Pfam	329	359	2.6E-9	signature_desc=Argonaute linker 1 domain	Name=PF08699	status=T	Dbxref="InterPro:IPR014811"
PHH51584.1	Pfam	664	972	5.0E-66	signature_desc=Piwi domain		Name=PF02171	status=T	Dbxref="InterPro:IPR003165"
PHH51584.1	Pfam	129	289	3.6E-11	signature_desc=N-terminal domain of argonaute	Name=PF16486	status=T	Dbxref="InterPro:IPR032474"
PHH51584.1	Pfam	526	572	4.4E-12	signature_desc=Argonaute linker 2 domain	Name=PF16488	status=T	Dbxref="InterPro:IPR032472"
PHH51584.1	ProSiteProfiles	450	500	9.1836	signature_desc=PAZ domain profile.		Name=PS50821	status=T	Dbxref="InterPro:IPR003100"
tr|V5IKU0|V5IKU0_NEUCR	.	1	1074	.
tr|V5IKU0|V5IKU0_NEUCR	Pfam	578	624	6.3E-10	signature_desc=Argonaute linker 2 domain	Name=PF16488	status=T	Dbxref="InterPro:IPR032472"
tr|V5IKU0|V5IKU0_NEUCR	Pfam	718	1035	1.6E-65	signature_desc=Piwi domain		Name=PF02171	status=T	Dbxref="InterPro:IPR003165"
tr|V5IKU0|V5IKU0_NEUCR	Pfam	328	377	7.9E-10	signature_desc=Argonaute linker 1 domain	Name=PF08699	status=T	Dbxref="InterPro:IPR014811"
tr|V5IKU0|V5IKU0_NEUCR	Pfam	163	309	1.2E-11	signature_desc=N-terminal domain of argonaute	Name=PF16486	status=T	Dbxref="InterPro:IPR032474
tr|V5IKU0|V5IKU0_NEUCR	ProSiteProfiles	507	551	8.77985	signature_desc=PAZ domain profile.		Name=PS50821	status=T	Dbxref="InterPro:IPR003100"
PHH53977.1	.	1	1774	.
PHH53977.1	Pfam	1101	1205	3.2E-15	signature_desc=Helicase conserved C-terminal domain	Name=PF00271	status=T	Dbxref="InterPro:IPR001650"
PHH53977.1	Pfam	889	1061	2.1E-22	signature_desc=DEAD/DEAH box helicase		Name=PF00270	status=T	Dbxref="InterPro:IPR011545"
PHH53977.1	Pfam	1303	1415	9.0E-11	signature_desc=RQC domain		Name=PF09382	status=T	Dbxref="InterPro:IPR018982"
PHH53977.1	Pfam	1218	1294	2.7E-13	signature_desc=RecQ zinc-binding	Name=PF16124	status=T	Dbxref="InterPro:IPR032284"
tr|Q7SDG4|Q7SDG4_NEUCR	.	1	2330	.
tr|Q7SDG4|Q7SDG4_NEUCR	Pfam	1284	1456	4.0E-20	signature_desc=DEAD/DEAH box helicase		Name=PF00270	status=T	Dbxref="InterPro:IPR011545"
tr|Q7SDG4|Q7SDG4_NEUCR	Pfam	1493	1601	4.8E-17	signature_desc=Helicase conserved C-terminal domain	Name=PF00271	status=T	Dbxref="InterPro:IPR001650"
tr|Q7SDG4|Q7SDG4_NEUCR	Pfam	1613	1679	1.8E-16	signature_desc=RecQ zinc-binding	Name=PF16124	status=T	Dbxref="InterPro:IPR032284"
tr|Q7SDG4|Q7SDG4_NEUCR	Pfam	1687	1796	2.7E-12	signature_desc=RQC domain		Name=PF09382	status=T	Dbxref="InterPro:IPR018982"
PHH54443.1	.	1	258	.
PHH54443.1	SUPERFAMILY	55	237	7.05E-11	Name=SSF53098	status=T	Dbxref="InterPro:IPR012337"
tr|U9W4S9|U9W4S9_NEUCR	.	1	508	.
tr|U9W4S9|U9W4S9_NEUCR	SUPERFAMILY	243	426	1.46E-12	Name=SSF53098	status=T	Dbxref="InterPro:IPR012337"
PHH50567.1	.	1	1672	.
PHH50567.1	Pfam	556	1132	0.0	signature_desc=RNA dependent RNA polymerase	RdRP	Name=PF05183	status=T	Dbxref="InterPro:IPR007855"
tr|Q1K907|Q1K907_NEUCR	.	1	1638	.
tr|Q1K907|Q1K907_NEUCR	Pfam	539	1103	0.0	signature_desc=RNA dependent RNA polymerase	RdRP	Name=PF05183	status=T	Dbxref="InterPro:IPR007855"
PHH49922.1	.	1	898	.
PHH49922.1	Pfam	551	845	9.1E-80	signature_desc=Piwi domain		Name=PF02171	status=T	Dbxref="InterPro:IPR003165"
PHH49922.1	Pfam	412	457	3.0E-11	signature_desc=Argonaute linker 2 domain	Name=PF16488	status=T	Dbxref="InterPro:IPR032472"
PHH49922.1	Pfam	334	401	4.7E-11	signature_desc=PAZ domain		Name=PF02170	status=T	Dbxref="InterPro:IPR003100"
PHH49922.1	Pfam	194	247	3.5E-11	signature_desc=Argonaute linker 1 domain	Name=PF08699	status=T	Dbxref="InterPro:IPR014811"
PHH49922.1	Pfam	46	182	2.3E-13	signature_desc=N-terminal domain of argonaute	Name=PF16486	status=T	Dbxref="InterPro:IPR032474"
tr|Q1K660|Q1K660_NEUCR	.	1	989	.
tr|Q1K660|Q1K660_NEUCR	Pfam	482	526	1.1E-10	signature_desc=Argonaute linker 2 domain	Name=PF16488	status=T	Dbxref="InterPro:IPR032472"
tr|Q1K660|Q1K660_NEUCR	Pfam	537	596	1.5E-6	signature_desc=Mid domain of argonaute	Name=PF16487	status=T	Dbxref="InterPro:IPR032473699 988	Ontology_term="GO:0003676"	ID=match$10_699_988	Name=G3DSA:3.30.420.10	status=T	Dbxref="InterPro:IPR036397"
tr|Q1K660|Q1K660_NEUCR	Pfam	630	927	3.0E-82	signature_desc=Piwi domain		Name=PF02171	status=T	Dbxref="InterPro:IPR003165"
tr|Q1K660|Q1K660_NEUCR	Pfam	256	309	3.6E-16	signature_desc=Argonaute linker 1 domain	Name=PF08699	status=T	Dbxref="InterPro:IPR014811"
tr|Q1K660|Q1K660_NEUCR	Pfam	110	246	1.3E-20	signature_desc=N-terminal domain of argonaute	Name=PF16486	status=T	Dbxref="InterPro:IPR032474"
tr|Q1K660|Q1K660_NEUCR	Pfam	361	472	1.1E-6	signature_desc=PAZ domain		Name=PF02170	status=T	Dbxref="InterPro:IPR003100"

## Sheet: IPR_N.crassa
sp|Q7S8J7|DCL1_NEUCR	.	polypeptide	1	1584	.	+	.	ID=sp|Q7S8J7|DCL1_NEUCR;md5=62dcfc223ea356b18334a1c9595605bc
sp|Q7S8J7|DCL1_NEUCR	Pfam	protein_match	654	740	3.9E-21	+	.	date=23-11-2022;Target=sp|Q7S8J7|DCL1_NEUCR 654 740;ID=match$5_654_740;signature_desc=Dicer dimerisation domain;Name=PF03368;status=T
sp|Q7S8J7|DCL1_NEUCR	Pfam	protein_match	461	577	4.8E-17	+	.	date=23-11-2022;Target=sp|Q7S8J7|DCL1_NEUCR 461 577;ID=match$9_461_577;signature_desc=Helicase conserved C-terminal domain;Name=PF00271;status=T;Dbxref="InterPro:IPR001650"
sp|Q7S8J7|DCL1_NEUCR	Pfam	protein_match	1295	1423	4.5E-19	+	.	date=23-11-2022;Target=sp|Q7S8J7|DCL1_NEUCR 1295 1423;Ontology_term="GO:0004525","GO:0006396";ID=match$28_1295_1423;signature_desc=Ribonuclease III domain;Name=PF00636;status=T;Dbxref="InterPro:IPR000999"
sp|Q7S8J7|DCL1_NEUCR	Pfam	protein_match	1099	1206	6.7E-20	+	.	date=23-11-2022;Target=sp|Q7S8J7|DCL1_NEUCR 1099 1206;Ontology_term="GO:0004525","GO:0006396";ID=match$28_1099_1206;signature_desc=Ribonuclease III domain;Name=PF00636;status=T;Dbxref="InterPro:IPR000999"
sp|Q7S8J7|DCL1_NEUCR	Pfam	protein_match	124	292	2.0E-14	+	.	date=23-11-2022;Target=sp|Q7S8J7|DCL1_NEUCR 124 292;Ontology_term="GO:0003677","GO:0005524","GO:0016787";ID=match$29_124_292;signature_desc=Type III restriction enzyme, res subunit;Name=PF04851;status=T;Dbxref="InterPro:IPR006935"
sp|Q7S8J7|DCL1_NEUCR	ProSitePatterns	protein_match	1099	1107	.	+	.	date=23-11-2022;Target=sp|Q7S8J7|DCL1_NEUCR 1099 1107;Ontology_term="GO:0004525","GO:0006396";ID=match$16_1099_1107;signature_desc=Ribonuclease III family signature.;Name=PS00517;status=T;Dbxref="InterPro:IPR000999"
sp|Q7S8J7|DCL1_NEUCR	ProSitePatterns	protein_match	1295	1303	.	+	.	date=23-11-2022;Target=sp|Q7S8J7|DCL1_NEUCR 1295 1303;Ontology_term="GO:0004525","GO:0006396";ID=match$23_1295_1303;signature_desc=Ribonuclease III family signature.;Name=PS00517;status=T;Dbxref="InterPro:IPR000999"
sp|Q7S8J7|DCL1_NEUCR	ProSiteProfiles	protein_match	1258	1424	29.926701	+	.	date=23-11-2022;Target=sp|Q7S8J7|DCL1_NEUCR 1258 1424;Ontology_term="GO:0004525","GO:0006396";ID=match$8_1258_1424;signature_desc=Ribonuclease III family domain profile.;Name=PS50142;status=T;Dbxref="InterPro:IPR000999"
sp|Q7S8J7|DCL1_NEUCR	ProSiteProfiles	protein_match	129	310	18.720427	+	.	date=23-11-2022;Target=sp|Q7S8J7|DCL1_NEUCR 129 310;ID=match$11_129_310;signature_desc=Superfamilies 1 and 2 helicase ATP-binding type-1 domain profile.;Name=PS51192;status=T;Dbxref="InterPro:IPR014001"
sp|Q7S8J7|DCL1_NEUCR	ProSiteProfiles	protein_match	1067	1207	22.334036	+	.	date=23-11-2022;Target=sp|Q7S8J7|DCL1_NEUCR 1067 1207;Ontology_term="GO:0004525","GO:0006396";ID=match$18_1067_1207;signature_desc=Ribonuclease III family domain profile.;Name=PS50142;status=T;Dbxref="InterPro:IPR000999"
sp|Q7S8J7|DCL1_NEUCR	ProSiteProfiles	protein_match	654	744	20.84059	+	.	date=23-11-2022;Target=sp|Q7S8J7|DCL1_NEUCR 654 744;Ontology_term="GO:0016891";ID=match$25_654_744;signature_desc=Dicer double-stranded RNA-binding fold domain profile.;Name=PS51327;status=T;Dbxref="InterPro:IPR005034"
sp|Q7S8J7|DCL1_NEUCR	ProSiteProfiles	protein_match	448	621	14.74142	+	.	date=23-11-2022;Target=sp|Q7S8J7|DCL1_NEUCR 448 621;ID=match$26_448_621;signature_desc=Superfamilies 1 and 2 helicase C-terminal domain profile.;Name=PS51194;status=T;Dbxref="InterPro:IPR001650"
sp|Q7S8J7|DCL1_NEUCR	SUPERFAMILY	protein_match	174	592	3.48E-39	+	.	date=23-11-2022;Target=sp|Q7S8J7|DCL1_NEUCR 174 592;ID=match$7_174_592;Name=SSF52540;status=T;Dbxref="InterPro:IPR027417"
sp|Q7S8J7|DCL1_NEUCR	SUPERFAMILY	protein_match	1257	1449	6.63E-39	+	.	date=23-11-2022;Target=sp|Q7S8J7|DCL1_NEUCR 1257 1449;Ontology_term="GO:0004525","GO:0006396";ID=match$10_1257_1449;Name=SSF69065;status=T;Dbxref="InterPro:IPR036389"
sp|Q7S8J7|DCL1_NEUCR	SUPERFAMILY	protein_match	1045	1218	3.49E-28	+	.	date=23-11-2022;Target=sp|Q7S8J7|DCL1_NEUCR 1045 1218;Ontology_term="GO:0004525","GO:0006396";ID=match$17_1045_1218;Name=SSF69065;status=T;Dbxref="InterPro:IPR036389"
sp|Q7SCC1|DCL2_NEUCR	.	polypeptide	1	1534	.	+	.	ID=sp|Q7SCC1|DCL2_NEUCR;md5=b6b6491ddccd92133b9466c341af5fef
sp|Q7SCC1|DCL2_NEUCR	Pfam	protein_match	108	200	1.2E-7	+	.	date=23-11-2022;Target=sp|Q7SCC1|DCL2_NEUCR 108 200;Ontology_term="GO:0003676","GO:0005524";ID=match$2_108_200;signature_desc=DEAD/DEAH box helicase;Name=PF00270;status=T;Dbxref="InterPro:IPR011545"
sp|Q7SCC1|DCL2_NEUCR	Pfam	protein_match	597	694	9.4E-20	+	.	date=23-11-2022;Target=sp|Q7SCC1|DCL2_NEUCR 597 694;ID=match$9_597_694;signature_desc=Dicer dimerisation domain;Name=PF03368;status=T
sp|Q7SCC1|DCL2_NEUCR	Pfam	protein_match	1190	1353	2.0E-12	+	.	date=23-11-2022;Target=sp|Q7SCC1|DCL2_NEUCR 1190 1353;Ontology_term="GO:0004525","GO:0006396";ID=match$27_1190_1353;signature_desc=Ribonuclease III domain;Name=PF00636;status=T;Dbxref="InterPro:IPR000999"
sp|Q7SCC1|DCL2_NEUCR	Pfam	protein_match	998	1106	7.1E-19	+	.	date=23-11-2022;Target=sp|Q7SCC1|DCL2_NEUCR 998 1106;Ontology_term="GO:0004525","GO:0006396";ID=match$27_998_1106;signature_desc=Ribonuclease III domain;Name=PF00636;status=T;Dbxref="InterPro:IPR000999"
sp|Q7SCC1|DCL2_NEUCR	Pfam	protein_match	404	526	1.6E-16	+	.	date=23-11-2022;Target=sp|Q7SCC1|DCL2_NEUCR 404 526;ID=match$30_404_526;signature_desc=Helicase conserved C-terminal domain;Name=PF00271;status=T;Dbxref="InterPro:IPR001650"
sp|Q7SCC1|DCL2_NEUCR	ProSitePatterns	protein_match	1190	1198	.	+	.	date=23-11-2022;Target=sp|Q7SCC1|DCL2_NEUCR 1190 1198;Ontology_term="GO:0004525","GO:0006396";ID=match$28_1190_1198;signature_desc=Ribonuclease III family signature.;Name=PS00517;status=T;Dbxref="InterPro:IPR000999"
sp|Q7SCC1|DCL2_NEUCR	ProSiteProfiles	protein_match	404	575	15.025245	+	.	date=23-11-2022;Target=sp|Q7SCC1|DCL2_NEUCR 404 575;ID=match$4_404_575;signature_desc=Superfamilies 1 and 2 helicase C-terminal domain profile.;Name=PS51194;status=T;Dbxref="InterPro:IPR001650"
sp|Q7SCC1|DCL2_NEUCR	ProSiteProfiles	protein_match	65	249	15.048586	+	.	date=23-11-2022;Target=sp|Q7SCC1|DCL2_NEUCR 65 249;ID=match$13_65_249;signature_desc=Superfamilies 1 and 2 helicase ATP-binding type-1 domain profile.;Name=PS51192;status=T;Dbxref="InterPro:IPR014001"
sp|Q7SCC1|DCL2_NEUCR	ProSiteProfiles	protein_match	1383	1483	9.027947	+	.	date=23-11-2022;Target=sp|Q7SCC1|DCL2_NEUCR 1383 1483;ID=match$14_1383_1483;signature_desc=Double stranded RNA-binding domain (dsRBD) profile.;Name=PS50137;status=T;Dbxref="InterPro:IPR014720"
sp|Q7SCC1|DCL2_NEUCR	ProSiteProfiles	protein_match	597	700	22.199074	+	.	date=23-11-2022;Target=sp|Q7SCC1|DCL2_NEUCR 597 700;Ontology_term="GO:0016891";ID=match$20_597_700;signature_desc=Dicer double-stranded RNA-binding fold domain profile.;Name=PS51327;status=T;Dbxref="InterPro:IPR005034"
sp|Q7SCC1|DCL2_NEUCR	ProSiteProfiles	protein_match	974	1107	24.232201	+	.	date=23-11-2022;Target=sp|Q7SCC1|DCL2_NEUCR 974 1107;Ontology_term="GO:0004525","GO:0006396";ID=match$24_974_1107;signature_desc=Ribonuclease III family domain profile.;Name=PS50142;status=T;Dbxref="InterPro:IPR000999"
sp|Q7SCC1|DCL2_NEUCR	ProSiteProfiles	protein_match	1153	1353	16.931562	+	.	date=23-11-2022;Target=sp|Q7SCC1|DCL2_NEUCR 1153 1353;Ontology_term="GO:0004525","GO:0006396";ID=match$26_1153_1353;signature_desc=Ribonuclease III family domain profile.;Name=PS50142;status=T;Dbxref="InterPro:IPR000999"
sp|Q7SCC1|DCL2_NEUCR	SUPERFAMILY	protein_match	1151	1366	3.79E-25	+	.	date=23-11-2022;Target=sp|Q7SCC1|DCL2_NEUCR 1151 1366;Ontology_term="GO:0004525","GO:0006396";ID=match$5_1151_1366;Name=SSF69065;status=T;Dbxref="InterPro:IPR036389"
sp|Q7SCC1|DCL2_NEUCR	SUPERFAMILY	protein_match	976	1119	3.14E-27	+	.	date=23-11-2022;Target=sp|Q7SCC1|DCL2_NEUCR 976 1119;Ontology_term="GO:0004525","GO:0006396";ID=match$22_976_1119;Name=SSF69065;status=T;Dbxref="InterPro:IPR036389"
sp|Q7SCC1|DCL2_NEUCR	SUPERFAMILY	protein_match	108	536	7.04E-39	+	.	date=23-11-2022;Target=sp|Q7SCC1|DCL2_NEUCR 108 536;ID=match$25_108_536;Name=SSF52540;status=T;Dbxref="InterPro:IPR027417"
tr|Q7SA88|Q7SA88_NEUCR	.	polypeptide	1	439	.	+	.	ID=tr|Q7SA88|Q7SA88_NEUCR;md5=4ce0823809bd71ae5743c9b374b31bb0
tr|Q7SA88|Q7SA88_NEUCR	ProSiteProfiles	protein_match	85	174	13.463758	+	.	date=23-11-2022;Target=tr|Q7SA88|Q7SA88_NEUCR 85 174;Ontology_term="GO:0004525","GO:0006396";ID=match$5_85_174;signature_desc=Ribonuclease III family domain profile.;Name=PS50142;status=T;Dbxref="InterPro:IPR000999"
tr|Q7SA88|Q7SA88_NEUCR	SUPERFAMILY	protein_match	78	335	7.15E-25	+	.	date=23-11-2022;Target=tr|Q7SA88|Q7SA88_NEUCR 78 335;Ontology_term="GO:0004525","GO:0006396";ID=match$15_78_335;Name=SSF69065;status=T;Dbxref="InterPro:IPR036389"
tr|Q7SA88|Q7SA88_NEUCR	SUPERFAMILY	protein_match	333	415	5.62E-10	+	.	date=23-11-2022;Target=tr|Q7SA88|Q7SA88_NEUCR 333 415;ID=match$17_333_415;Name=SSF54768;status=T
tr|V5IKU0|V5IKU0_NEUCR	.	polypeptide	1	1074	.	+	.	ID=tr|V5IKU0|V5IKU0_NEUCR;md5=63659684d2129e53172ab944a13e4fc7
tr|V5IKU0|V5IKU0_NEUCR	Pfam	protein_match	578	624	6.3E-10	+	.	date=23-11-2022;Target=tr|V5IKU0|V5IKU0_NEUCR 578 624;ID=match$7_578_624;signature_desc=Argonaute linker 2 domain;Name=PF16488;status=T;Dbxref="InterPro:IPR032472"
tr|V5IKU0|V5IKU0_NEUCR	Pfam	protein_match	718	1035	1.6E-65	+	.	date=23-11-2022;Target=tr|V5IKU0|V5IKU0_NEUCR 718 1035;Ontology_term="GO:0003676";ID=match$8_718_1035;signature_desc=Piwi domain;Name=PF02171;status=T;Dbxref="InterPro:IPR003165"
tr|V5IKU0|V5IKU0_NEUCR	Pfam	protein_match	328	377	7.9E-10	+	.	date=23-11-2022;Target=tr|V5IKU0|V5IKU0_NEUCR 328 377;ID=match$11_328_377;signature_desc=Argonaute linker 1 domain;Name=PF08699;status=T;Dbxref="InterPro:IPR014811"
tr|V5IKU0|V5IKU0_NEUCR	Pfam	protein_match	163	309	1.2E-11	+	.	date=23-11-2022;Target=tr|V5IKU0|V5IKU0_NEUCR 163 309;ID=match$16_163_309;signature_desc=N-terminal domain of argonaute;Name=PF16486;status=T;Dbxref="InterPro:IPR032474
tr|V5IKU0|V5IKU0_NEUCR	ProSiteProfiles	protein_match	507	551	8.77985	+	.	date=23-11-2022;Target=tr|V5IKU0|V5IKU0_NEUCR 507 551;Ontology_term="GO:0005515";ID=match$6_507_551;signature_desc=PAZ domain profile.;Name=PS50821;status=T;Dbxref="InterPro:IPR003100"
tr|V5IKU0|V5IKU0_NEUCR	ProSiteProfiles	protein_match	718	1037	31.743767	+	.	date=23-11-2022;Target=tr|V5IKU0|V5IKU0_NEUCR 718 1037;Ontology_term="GO:0003676";ID=match$17_718_1037;signature_desc=Piwi domain profile.;Name=PS50822;status=T;Dbxref="InterPro:IPR003165
tr|V5IKU0|V5IKU0_NEUCR	SUPERFAMILY	protein_match	376	590	4.08E-23	+	.	date=23-11-2022;Target=tr|V5IKU0|V5IKU0_NEUCR 376 590;Ontology_term="GO:0005515";ID=match$2_376_590;Name=SSF101690;status=T;Dbxref="InterPro:IPR036085"
tr|V5IKU0|V5IKU0_NEUCR	SUPERFAMILY	protein_match	714	1038	1.69E-71	+	.	date=23-11-2022;Target=tr|V5IKU0|V5IKU0_NEUCR 714 1038;ID=match$13_714_1038;Name=SSF53098;status=T;Dbxref="InterPro:IPR012337"
tr|Q7SDG4|Q7SDG4_NEUCR	.	polypeptide	1	2330	.	+	.	ID=tr|Q7SDG4|Q7SDG4_NEUCR;md5=1d1127364600dd2e1bdeaea9335f5e3a
tr|Q7SDG4|Q7SDG4_NEUCR	Pfam	protein_match	1284	1456	4.0E-20	+	.	date=23-11-2022;Target=tr|Q7SDG4|Q7SDG4_NEUCR 1284 1456;Ontology_term="GO:0003676","GO:0005524";ID=match$20_1284_1456;signature_desc=DEAD/DEAH box helicase;Name=PF00270;status=T;Dbxref="InterPro:IPR011545"
tr|Q7SDG4|Q7SDG4_NEUCR	Pfam	protein_match	1493	1601	4.8E-17	+	.	date=23-11-2022;Target=tr|Q7SDG4|Q7SDG4_NEUCR 1493 1601;ID=match$24_1493_1601;signature_desc=Helicase conserved C-terminal domain;Name=PF00271;status=T;Dbxref="InterPro:IPR001650"
tr|Q7SDG4|Q7SDG4_NEUCR	Pfam	protein_match	1613	1679	1.8E-16	+	.	date=23-11-2022;Target=tr|Q7SDG4|Q7SDG4_NEUCR 1613 1679;ID=match$39_1613_1679;signature_desc=RecQ zinc-binding;Name=PF16124;status=T;Dbxref="InterPro:IPR032284"
tr|Q7SDG4|Q7SDG4_NEUCR	Pfam	protein_match	1687	1796	2.7E-12	+	.	date=23-11-2022;Target=tr|Q7SDG4|Q7SDG4_NEUCR 1687 1796;Ontology_term="GO:0006260","GO:0006281","GO:0043138";ID=match$42_1687_1796;signature_desc=RQC domain;Name=PF09382;status=T;Dbxref="InterPro:IPR018982"
tr|Q7SDG4|Q7SDG4_NEUCR	ProSitePatterns	protein_match	1409	1418	.	+	.	date=23-11-2022;Target=tr|Q7SDG4|Q7SDG4_NEUCR 1409 1418;ID=match$5_1409_1418;signature_desc=DEAH-box subfamily ATP-dependent helicases signature.;Name=PS00690;status=T;Dbxref="InterPro:IPR002464"
tr|Q7SDG4|Q7SDG4_NEUCR	ProSiteProfiles	protein_match	1289	1470	20.594072	+	.	date=23-11-2022;Target=tr|Q7SDG4|Q7SDG4_NEUCR 1289 1470;ID=match$14_1289_1470;signature_desc=Superfamilies 1 and 2 helicase ATP-binding type-1 domain profile.;Name=PS51192;status=T;Dbxref="InterPro:IPR014001"
tr|Q7SDG4|Q7SDG4_NEUCR	ProSiteProfiles	protein_match	1957	2037	10.648483	+	.	date=23-11-2022;Target=tr|Q7SDG4|Q7SDG4_NEUCR 1957 2037;Ontology_term="GO:0003676";ID=match$22_1957_2037;signature_desc=HRDC domain profile.;Name=PS50967;status=T;Dbxref="InterPro:IPR002121"
tr|Q7SDG4|Q7SDG4_NEUCR	ProSiteProfiles	protein_match	1491	1643	19.880161	+	.	date=23-11-2022;Target=tr|Q7SDG4|Q7SDG4_NEUCR 1491 1643;ID=match$51_1491_1643;signature_desc=Superfamilies 1 and 2 helicase C-terminal domain profile.;Name=PS51194;status=T;Dbxref="InterPro:IPR001650"
tr|Q7SDG4|Q7SDG4_NEUCR	SUPERFAMILY	protein_match	1977	2031	4.01E-5	+	.	date=23-11-2022;Target=tr|Q7SDG4|Q7SDG4_NEUCR 1977 2031;Ontology_term="GO:0000166","GO:0044237";ID=match$13_1977_2031;Name=SSF47819;status=T;Dbxref="InterPro:IPR010997"
tr|Q7SDG4|Q7SDG4_NEUCR	SUPERFAMILY	protein_match	1688	1792	9.79E-6	+	.	date=23-11-2022;Target=tr|Q7SDG4|Q7SDG4_NEUCR 1688 1792;ID=match$19_1688_1792;Name=SSF46785;status=T;Dbxref="InterPro:IPR036390"
tr|Q7SDG4|Q7SDG4_NEUCR	SUPERFAMILY	protein_match	1325	1622	8.38E-56	+	.	date=23-11-2022;Target=tr|Q7SDG4|Q7SDG4_NEUCR 1325 1622;ID=match$28_1325_1622;Name=SSF52540;status=T;Dbxref="InterPro:IPR027417"
tr|U9W4S9|U9W4S9_NEUCR	.	polypeptide	1	508	.	+	.	ID=tr|U9W4S9|U9W4S9_NEUCR;md5=b5d2a67f109a0ff1fb5c242d5279d7db
tr|U9W4S9|U9W4S9_NEUCR	SUPERFAMILY	protein_match	243	426	1.46E-12	+	.	date=23-11-2022;Target=tr|U9W4S9|U9W4S9_NEUCR 243 426;ID=match$3_243_426;Name=SSF53098;status=T;Dbxref="InterPro:IPR012337"
tr|Q7S3A3|Q7S3A3_NEUCR	.	polypeptide	1	1160	.	+	.	ID=tr|Q7S3A3|Q7S3A3_NEUCR;md5=6032cffcc14d667a5cf6ded4496d8e31
tr|Q7S3A3|Q7S3A3_NEUCR	Pfam	protein_match	686	877	2.5E-35	+	.	date=23-11-2022;Target=tr|Q7S3A3|Q7S3A3_NEUCR 686 877;ID=match$2_686_877;signature_desc=AAA domain;Name=PF13087;status=T;Dbxref="InterPro:IPR041679"
tr|Q7S3A3|Q7S3A3_NEUCR	Pfam	protein_match	296	672	9.9E-21	+	.	date=23-11-2022;Target=tr|Q7S3A3|Q7S3A3_NEUCR 296 672;Ontology_term="GO:0004386";ID=match$4_296_672;signature_desc=AAA domain;Name=PF13086;status=T;Dbxref="InterPro:IPR041677"
tr|Q7S3A3|Q7S3A3_NEUCR	SUPERFAMILY	protein_match	294	901	9.84E-51	+	.	date=23-11-2022;Target=tr|Q7S3A3|Q7S3A3_NEUCR 294 901;ID=match$5_294_901;Name=SSF52540;status=T;Dbxref="InterPro:IPR027417"
tr|Q1K907|Q1K907_NEUCR	.	polypeptide	1	1638	.	+	.	ID=tr|Q1K907|Q1K907_NEUCR;md5=3ebb0115a878b42cc74a42a6e91e6f2a
tr|Q1K907|Q1K907_NEUCR	Pfam	protein_match	539	1103	0.0	+	.	date=23-11-2022;Target=tr|Q1K907|Q1K907_NEUCR 539 1103;Ontology_term="GO:0003968";ID=match$10_539_1103;signature_desc=RNA dependent RNA polymerase;Name=PF05183;status=T;Dbxref="InterPro:IPR007855"
tr|Q1K907|Q1K907_NEUCR	SUPERFAMILY	protein_match	40	141	2.04E-6	+	.	date=23-11-2022;Target=tr|Q1K907|Q1K907_NEUCR 40 141;Ontology_term="GO:0003676";ID=match$5_40_141;Name=SSF54928;status=T;Dbxref="InterPro:IPR035979"
tr|Q1K660|Q1K660_NEUCR	.	polypeptide	1	989	.	+	.	ID=tr|Q1K660|Q1K660_NEUCR;md5=2c1e747d32f80bcbb2286dc3a1eca0aa
tr|Q1K660|Q1K660_NEUCR	Pfam	protein_match	482	526	1.1E-10	+	.	date=23-11-2022;Target=tr|Q1K660|Q1K660_NEUCR 482 526;ID=match$6_482_526;signature_desc=Argonaute linker 2 domain;Name=PF16488;status=T;Dbxref="InterPro:IPR032472"
tr|Q1K660|Q1K660_NEUCR	Pfam	protein_match	537	596	1.5E-6	+	.	date=23-11-2022;Target=tr|Q1K660|Q1K660_NEUCR 537 596;ID=match$9_537_596;signature_desc=Mid domain of argonaute;Name=PF16487;status=T;Dbxref="InterPro:IPR032473699 988;Ontology_term="GO:0003676";ID=match$10_699_988;Name=G3DSA:3.30.420.10;status=T;Dbxref="InterPro:IPR036397"
tr|Q1K660|Q1K660_NEUCR	Pfam	protein_match	630	927	3.0E-82	+	.	date=23-11-2022;Target=tr|Q1K660|Q1K660_NEUCR 630 927;Ontology_term="GO:0003676";ID=match$11_630_927;signature_desc=Piwi domain;Name=PF02171;status=T;Dbxref="InterPro:IPR003165"
tr|Q1K660|Q1K660_NEUCR	Pfam	protein_match	256	309	3.6E-16	+	.	date=23-11-2022;Target=tr|Q1K660|Q1K660_NEUCR 256 309;ID=match$12_256_309;signature_desc=Argonaute linker 1 domain;Name=PF08699;status=T;Dbxref="InterPro:IPR014811"
tr|Q1K660|Q1K660_NEUCR	Pfam	protein_match	110	246	1.3E-20	+	.	date=23-11-2022;Target=tr|Q1K660|Q1K660_NEUCR 110 246;ID=match$13_110_246;signature_desc=N-terminal domain of argonaute;Name=PF16486;status=T;Dbxref="InterPro:IPR032474"
tr|Q1K660|Q1K660_NEUCR	Pfam	protein_match	361	472	1.1E-6	+	.	date=23-11-2022;Target=tr|Q1K660|Q1K660_NEUCR 361 472;Ontology_term="GO:0005515";ID=match$23_361_472;signature_desc=PAZ domain;Name=PF02170;status=T;Dbxref="InterPro:IPR003100"
tr|Q1K660|Q1K660_NEUCR	ProSiteProfiles	protein_match	629	929	38.380322	+	.	date=23-11-2022;Target=tr|Q1K660|Q1K660_NEUCR 629 929;Ontology_term="GO:0003676";ID=match$2_629_929;signature_desc=Piwi domain profile.;Name=PS50822;status=T;Dbxref="InterPro:IPR003165"
tr|Q1K660|Q1K660_NEUCR	ProSiteProfiles	protein_match	374	456	11.372351	+	.	date=23-11-2022;Target=tr|Q1K660|Q1K660_NEUCR 374 456;Ontology_term="GO:0005515";ID=match$24_374_456;signature_desc=PAZ domain profile.;Name=PS50821;status=T;Dbxref="InterPro:IPR003100"
tr|Q1K660|Q1K660_NEUCR	SUPERFAMILY	protein_match	627	930	3.54E-78	+	.	date=23-11-2022;Target=tr|Q1K660|Q1K660_NEUCR 627 930;ID=match$8_627_930;Name=SSF53098;status=T;Dbxref="InterPro:IPR012337"
tr|Q1K660|Q1K660_NEUCR	SUPERFAMILY	protein_match	344	496	4.24E-34	+	.	date=23-11-2022;Target=tr|Q1K660|Q1K660_NEUCR 344 496;Ontology_term="GO:0005515";ID=match$22_344_496;Name=SSF101690;status=T;Dbxref="InterPro:IPR036085"

## Sheet: IPR_C.fimbriata
PHH50670.1	.	polypeptide	1	1634	.	+	.	ID=PHH50670.1;md5=475b10915700c6217a980db9296b7465
PHH50670.1	Pfam	protein_match	735	825	2.0E-18	+	.	date=23-11-2022;Target=PHH50670.1 735 825;ID=match$1_735_825;signature_desc=Dicer dimerisation domain;Name=PF03368;status=T
PHH50670.1	Pfam	protein_match	1182	1288	1.0E-19	+	.	date=23-11-2022;Target=PHH50670.1 1182 1288;Ontology_term="GO:0004525","GO:0006396";ID=match$9_1182_1288;signature_desc=Ribonuclease III domain;Name=PF00636;status=T;Dbxref="InterPro:IPR000999"
PHH50670.1	Pfam	protein_match	1384	1509	1.7E-16	+	.	date=23-11-2022;Target=PHH50670.1 1384 1509;Ontology_term="GO:0004525","GO:0006396";ID=match$9_1384_1509;signature_desc=Ribonuclease III domain;Name=PF00636;status=T;Dbxref="InterPro:IPR000999",
PHH50670.1	Pfam	protein_match	545	658	8.8E-18	+	.	date=23-11-2022;Target=PHH50670.1 545 658;ID=match$20_545_658;signature_desc=Helicase conserved C-terminal domain;Name=PF00271;status=T;Dbxref="InterPro:IPR001650"
PHH50670.1	Pfam	protein_match	232	385	2.3E-9	+	.	date=23-11-2022;Target=PHH50670.1 232 385;Ontology_term="GO:0003677","GO:0005524","GO:0016787";ID=match$27_232_385;signature_desc=Type III restriction enzyme, res subunit;Name=PF04851;status=T;Dbxref="InterPro:IPR006935"
PHH50670.1	ProSiteProfiles	protein_match	238	403	13.545898	+	.	date=23-11-2022;Target=PHH50670.1 238 403;ID=match$2_238_403;signature_desc=Superfamilies 1 and 2 helicase ATP-binding type-1 domain profile.;Name=PS51192;status=T;Dbxref="InterPro:IPR014001"
PHH50670.1	ProSiteProfiles	protein_match	1349	1509	27.225464	+	.	date=23-11-2022;Target=PHH50670.1 1349 1509;Ontology_term="GO:0004525","GO:0006396";ID=match$12_1349_1509;signature_desc=Ribonuclease III family domain profile.;Name=PS50142;status=T;Dbxref="InterPro:IPR000999"
PHH50670.1	ProSiteProfiles	protein_match	1176	1290	22.169771	+	.	date=23-11-2022;Target=PHH50670.1 1176 1290;Ontology_term="GO:0004525","GO:0006396";ID=match$14_1176_1290;signature_desc=Ribonuclease III family domain profile.;Name=PS50142;status=T;Dbxref="InterPro:IPR000999"
PHH50670.1	ProSiteProfiles	protein_match	735	829	18.297047	+	.	date=23-11-2022;Target=PHH50670.1 735 829;Ontology_term="GO:0016891";ID=match$17_735_829;signature_desc=Dicer double-stranded RNA-binding fold domain profile.;Name=PS51327;status=T;Dbxref="InterPro:IPR005034"
PHH50670.1	ProSiteProfiles	protein_match	545	713	14.034345	+	.	date=23-11-2022;Target=PHH50670.1 545 713;ID=match$25_545_713;signature_desc=Superfamilies 1 and 2 helicase C-terminal domain profile.;Name=PS51194;status=T;Dbxref="InterPro:IPR001650"
PHH50670.1	SUPERFAMILY	protein_match	270	678	4.18E-40	+	.	date=23-11-2022;Target=PHH50670.1 270 678;ID=match$4_270_678;Name=SSF52540;status=T;Dbxref="InterPro:IPR027417"
PHH50670.1	SUPERFAMILY	protein_match	1131	1288	8.37E-24	+	.	date=23-11-2022;Target=PHH50670.1 1131 1288;Ontology_term="GO:0004525","GO:0006396";ID=match$11_1131_1288;Name=SSF69065;status=T;Dbxref="InterPro:IPR036389",
PHH55345.1	.	polypeptide	1	1430	.	+	.	ID=PHH55345.1;md5=208ff9cda43a5fc9ac867e017dba1dfb
PHH55345.1	Pfam	protein_match	429	540	2.9E-16	+	.	date=23-11-2022;Target=PHH55345.1 429 540;ID=match$11_429_540;signature_desc=Helicase conserved C-terminal domain;Name=PF00271;status=T;Dbxref="InterPro:IPR001650"
PHH55345.1	Pfam	protein_match	616	708	5.2E-22	+	.	date=23-11-2022;Target=PHH55345.1 616 708;ID=match$15_616_708;signature_desc=Dicer dimerisation domain;Name=PF03368;status=T
PHH55345.1	Pfam	protein_match	70	236	2.4E-18	+	.	date=23-11-2022;Target=PHH55345.1 70 236;Ontology_term="GO:0003676","GO:0005524";ID=match$28_70_236;signature_desc=DEAD/DEAH box helicase;Name=PF00270;status=T;Dbxref="InterPro:IPR011545"
PHH55345.1	ProSiteProfiles	protein_match	419	579	15.284174	+	.	date=23-11-2022;Target=PHH55345.1 419 579;ID=match$3_419_579;signature_desc=Superfamilies 1 and 2 helicase C-terminal domain profile.;Name=PS51194;status=T;Dbxref="InterPro:IPR001650"
PHH55345.1	ProSiteProfiles	protein_match	973	1115	27.608747	+	.	date=23-11-2022;Target=PHH55345.1 973 1115;Ontology_term="GO:0004525","GO:0006396";ID=match$16_973_1115;signature_desc=Ribonuclease III family domain profile.;Name=PS50142;status=T;Dbxref="InterPro:IPR000999"
PHH55345.1	ProSiteProfiles	protein_match	75	251	19.85216	+	.	date=23-11-2022;Target=PHH55345.1 75 251;ID=match$21_75_251;signature_desc=Superfamilies 1 and 2 helicase ATP-binding type-1 domain profile.;Name=PS51192;status=T;Dbxref="InterPro:IPR014001"
PHH55345.1	ProSiteProfiles	protein_match	616	713	23.037287	+	.	date=23-11-2022;Target=PHH55345.1 616 713;Ontology_term="GO:0016891";ID=match$22_616_713;signature_desc=Dicer double-stranded RNA-binding fold domain profile.;Name=PS51327;status=T;Dbxref="InterPro:IPR005034"
PHH55345.1	SUPERFAMILY	protein_match	111	559	8.21E-45	+	.	date=23-11-2022;Target=PHH55345.1 111 559;ID=match$5_111_559;Name=SSF52540;status=T;Dbxref="InterPro:IPR027417"
PHH55345.1	SUPERFAMILY	protein_match	1150	1345	1.05E-28	+	.	date=23-11-2022;Target=PHH55345.1 1150 1345;Ontology_term="GO:0004525","GO:0006396";ID=match$7_1150_1345;Name=SSF69065;status=T;Dbxref="InterPro:IPR036389"
PHH55345.1	SUPERFAMILY	protein_match	1311	1423	1.91E-5	+	.	date=23-11-2022;Target=PHH55345.1 1311 1423;ID=match$10_1311_1423;Name=SSF54768;status=T
PHH55345.1	SUPERFAMILY	protein_match	984	1129	1.36E-27	+	.	date=23-11-2022;Target=PHH55345.1 984 1129;Ontology_term="GO:0004525","GO:0006396";ID=match$18_984_1129;Name=SSF69065;status=T;Dbxref="InterPro:IPR036389"
PHH51213.1	.	polypeptide	1	451	.	+	.	ID=PHH51213.1;md5=7e743ea4c0b058e99867ef6fe766e5b5
PHH51213.1	Pfam	protein_match	353	415	1.1E-5	+	.	date=23-11-2022;Target=PHH51213.1 353 415;ID=match$16_353_415;signature_desc=Double-stranded RNA binding motif;Name=PF00035;status=T;Dbxref="InterPro:IPR014720"
PHH51213.1	ProSiteProfiles	protein_match	118	206	11.583844	+	.	date=23-11-2022;Target=PHH51213.1 118 206;Ontology_term="GO:0004525","GO:0006396";ID=match$4_118_206;signature_desc=Ribonuclease III family domain profile.;Name=PS50142;status=T;Dbxref="InterPro:IPR000999"
PHH51213.1	ProSiteProfiles	protein_match	349	419	9.149329	+	.	date=23-11-2022;Target=PHH51213.1 349 419;ID=match$8_349_419;signature_desc=Double stranded RNA-binding domain (dsRBD) profile.;Name=PS50137;status=T;Dbxref="InterPro:IPR014720"
PHH51213.1	SUPERFAMILY	protein_match	350	427	7.23E-11	+	.	date=23-11-2022;Target=PHH51213.1 350 427;ID=match$6_350_427;Name=SSF54768;status=T
PHH51213.1	SUPERFAMILY	protein_match	113	340	1.31E-22	+	.	date=23-11-2022;Target=PHH51213.1 113 340;Ontology_term="GO:0004525","GO:0006396";ID=match$15_113_340;Name=SSF69065;status=T;Dbxref="InterPro:IPR036389"
PHH51584.1	.	polypeptide	1	1004	.	+	.	ID=PHH51584.1;md5=ced07cfe63734834996684461c28854e
PHH51584.1	Pfam	protein_match	329	359	2.6E-9	+	.	date=23-11-2022;Target=PHH51584.1 329 359;ID=match$9_329_359;signature_desc=Argonaute linker 1 domain;Name=PF08699;status=T;Dbxref="InterPro:IPR014811"
PHH51584.1	Pfam	protein_match	664	972	5.0E-66	+	.	date=23-11-2022;Target=PHH51584.1 664 972;Ontology_term="GO:0003676";ID=match$11_664_972;signature_desc=Piwi domain;Name=PF02171;status=T;Dbxref="InterPro:IPR003165"
PHH51584.1	Pfam	protein_match	129	289	3.6E-11	+	.	date=23-11-2022;Target=PHH51584.1 129 289;ID=match$14_129_289;signature_desc=N-terminal domain of argonaute;Name=PF16486;status=T;Dbxref="InterPro:IPR032474"
PHH51584.1	Pfam	protein_match	526	572	4.4E-12	+	.	date=23-11-2022;Target=PHH51584.1 526 572;ID=match$15_526_572;signature_desc=Argonaute linker 2 domain;Name=PF16488;status=T;Dbxref="InterPro:IPR032472"
PHH51584.1	ProSiteProfiles	protein_match	663	976	31.411146	+	.	date=23-11-2022;Target=PHH51584.1 663 976;Ontology_term="GO:0003676";ID=match$1_663_976;signature_desc=Piwi domain profile.;Name=PS50822;status=T;Dbxref="InterPro:IPR003165"
PHH51584.1	ProSiteProfiles	protein_match	450	500	9.1836	+	.	date=23-11-2022;Target=PHH51584.1 450 500;Ontology_term="GO:0005515";ID=match$5_450_500;signature_desc=PAZ domain profile.;Name=PS50821;status=T;Dbxref="InterPro:IPR003100"
PHH51584.1	SUPERFAMILY	protein_match	405	533	6.75E-16	+	.	date=23-11-2022;Target=PHH51584.1 405 533;Ontology_term="GO:0005515";ID=match$2_405_533;Name=SSF101690;status=T;Dbxref="InterPro:IPR036085"
PHH51584.1	SUPERFAMILY	protein_match	649	974	4.05E-74	+	.	date=23-11-2022;Target=PHH51584.1 649 974;ID=match$4_649_974;Name=SSF53098;status=T;Dbxref="InterPro:IPR012337"
PHH53977.1	.	polypeptide	1	1774	.	+	.	ID=PHH53977.1;md5=ee7de32d21ffc3904a4e2be1b8b07f86
PHH53977.1	Pfam	protein_match	1101	1205	3.2E-15	+	.	date=23-11-2022;Target=PHH53977.1 1101 1205;ID=match$6_1101_1205;signature_desc=Helicase conserved C-terminal domain;Name=PF00271;status=T;Dbxref="InterPro:IPR001650"
PHH53977.1	Pfam	protein_match	889	1061	2.1E-22	+	.	date=23-11-2022;Target=PHH53977.1 889 1061;Ontology_term="GO:0003676","GO:0005524";ID=match$14_889_1061;signature_desc=DEAD/DEAH box helicase;Name=PF00270;status=T;Dbxref="InterPro:IPR011545"
PHH53977.1	Pfam	protein_match	1303	1415	9.0E-11	+	.	date=23-11-2022;Target=PHH53977.1 1303 1415;Ontology_term="GO:0006260","GO:0006281","GO:0043138";ID=match$24_1303_1415;signature_desc=RQC domain;Name=PF09382;status=T;Dbxref="InterPro:IPR018982"
PHH53977.1	Pfam	protein_match	1218	1294	2.7E-13	+	.	date=23-11-2022;Target=PHH53977.1 1218 1294;ID=match$39_1218_1294;signature_desc=RecQ zinc-binding;Name=PF16124;status=T;Dbxref="InterPro:IPR032284"
PHH53977.1	ProSitePatterns	protein_match	1014	1023	.	+	.	date=23-11-2022;Target=PHH53977.1 1014 1023;ID=match$42_1014_1023;signature_desc=DEAH-box subfamily ATP-dependent helicases signature.;Name=PS00690;status=T;Dbxref="InterPro:IPR002464"
PHH53977.1	ProSiteProfiles	protein_match	894	1075	23.517714	+	.	date=23-11-2022;Target=PHH53977.1 894 1075;ID=match$29_894_1075;signature_desc=Superfamilies 1 and 2 helicase ATP-binding type-1 domain profile.;Name=PS51192;status=T;Dbxref="InterPro:IPR014001"
PHH53977.1	ProSiteProfiles	protein_match	1507	1590	9.706033	+	.	date=23-11-2022;Target=PHH53977.1 1507 1590;Ontology_term="GO:0003676";ID=match$31_1507_1590;signature_desc=HRDC domain profile.;Name=PS50967;status=T;Dbxref="InterPro:IPR002121"
PHH53977.1	ProSiteProfiles	protein_match	1101	1256	21.279373	+	.	date=23-11-2022;Target=PHH53977.1 1101 1256;ID=match$35_1101_1256;signature_desc=Superfamilies 1 and 2 helicase C-terminal domain profile.;Name=PS51194;status=T;Dbxref="InterPro:IPR001650"
PHH53977.1	SUPERFAMILY	protein_match	1302	1414	1.05E-5	+	.	date=23-11-2022;Target=PHH53977.1 1302 1414;ID=match$8_1302_1414;Name=SSF46785;status=T;Dbxref="InterPro:IPR036390"
PHH53977.1	SUPERFAMILY	protein_match	929	1226	1.47E-60	+	.	date=23-11-2022;Target=PHH53977.1 929 1226;ID=match$44_929_1226;Name=SSF52540;status=T;Dbxref="InterPro:IPR027417"
PHH54443.1	.	polypeptide	1	258	.	+	.	ID=PHH54443.1;md5=1cdfece2dbb7f8b94110594a65f65faa
PHH54443.1	SUPERFAMILY	protein_match	55	237	7.05E-11	+	.	date=23-11-2022;Target=PHH54443.1 55 237;ID=match$2_55_237;Name=SSF53098;status=T;Dbxref="InterPro:IPR012337"
PHH50118.1	Pfam	protein_match	266	642	5.0E-20	+	.	date=23-11-2022;Target=PHH50118.1 266 642;Ontology_term="GO:0004386";ID=match$3_266_642;signature_desc=AAA domain;Name=PF13086;status=T;Dbxref="InterPro:IPR041677"
PHH50118.1	Pfam	protein_match	656	849	1.5E-34	+	.	date=23-11-2022;Target=PHH50118.1 656 849;ID=match$5_656_849;signature_desc=AAA domain;Name=PF13087;status=T;Dbxref="InterPro:IPR041679"
PHH50118.1	SUPERFAMILY	protein_match	264	871	4.3E-51	+	.	date=23-11-2022;Target=PHH50118.1 264 871;ID=match$9_264_871;Name=SSF52540;status=T;Dbxref="InterPro:IPR027417"
PHH50567.1	.	polypeptide	1	1672	.	+	.	ID=PHH50567.1;md5=a3403e83493b94c72500b2053f190db0
PHH50567.1	Pfam	protein_match	556	1132	0.0	+	.	date=23-11-2022;Target=PHH50567.1 556 1132;Ontology_term="GO:0003968";ID=match$8_556_1132;signature_desc=RNA dependent RNA polymerase;Name=PF05183;status=T;Dbxref="InterPro:IPR007855"
PHH49922.1	.	polypeptide	1	898	.	+	.	ID=PHH49922.1;md5=5791afc11bd9e57a8de637ebe5befc71
PHH49922.1	Pfam	protein_match	551	845	9.1E-80	+	.	date=23-11-2022;Target=PHH49922.1 551 845;Ontology_term="GO:0003676";ID=match$5_551_845;signature_desc=Piwi domain;Name=PF02171;status=T;Dbxref="InterPro:IPR003165"
PHH49922.1	Pfam	protein_match	412	457	3.0E-11	+	.	date=23-11-2022;Target=PHH49922.1 412 457;ID=match$10_412_457;signature_desc=Argonaute linker 2 domain;Name=PF16488;status=T;Dbxref="InterPro:IPR032472"
PHH49922.1	Pfam	protein_match	334	401	4.7E-11	+	.	date=23-11-2022;Target=PHH49922.1 334 401;Ontology_term="GO:0005515";ID=match$11_334_401;signature_desc=PAZ domain;Name=PF02170;status=T;Dbxref="InterPro:IPR003100"
PHH49922.1	Pfam	protein_match	194	247	3.5E-11	+	.	date=23-11-2022;Target=PHH49922.1 194 247;ID=match$14_194_247;signature_desc=Argonaute linker 1 domain;Name=PF08699;status=T;Dbxref="InterPro:IPR014811"
PHH49922.1	Pfam	protein_match	46	182	2.3E-13	+	.	date=23-11-2022;Target=PHH49922.1 46 182;ID=match$17_46_182;signature_desc=N-terminal domain of argonaute;Name=PF16486;status=T;Dbxref="InterPro:IPR032474"
PHH49922.1	ProSiteProfiles	protein_match	338	385	17.1311	+	.	date=23-11-2022;Target=PHH49922.1 338 385;Ontology_term="GO:0005515";ID=match$2_338_385;signature_desc=PAZ domain profile.;Name=PS50821;status=T;Dbxref="InterPro:IPR003100"
PHH49922.1	ProSiteProfiles	protein_match	551	847	31.395308	+	.	date=23-11-2022;Target=PHH49922.1 551 847;Ontology_term="GO:0003676";ID=match$12_551_847;signature_desc=Piwi domain profile.;Name=PS50822;status=T;Dbxref="InterPro:IPR003165"
PHH49922.1	SUPERFAMILY	protein_match	281	425	1.48E-32	+	.	date=23-11-2022;Target=PHH49922.1 281 425;Ontology_term="GO:0005515";ID=match$3_281_425;Name=SSF101690;status=T;Dbxref="InterPro:IPR036085"
PHH49922.1	SUPERFAMILY	protein_match	537	847	9.61E-70	+	.	date=23-11-2022;Target=PHH49922.1 537 847;ID=match$6_537_847;Name=SSF53098;status=T;Dbxref="InterPro:IPR012337"
